# Supplementary material for: The miR-199a/214 Cluster Controls Nephrogenesis and Vascularization in a Human Embryonic Stem Cell Model
Source: PubMed Central journal article supplement — Stem Cell Reports. 2020 Dec 10;16(1):134–48. doi: 10.1016/j.stemcr.2020.11.007 (PMC7897558; doi:10.1016/j.stemcr.2020.11.007), 2020-12-10
Supplement: mmc1.pdf [file mmc1.pdf]

**Stem Cell Reports, Volume 16**

**Supplemental Information**

**The *miR-199a/214* Cluster Controls Nephrogenesis and Vascularization  
in a Human Embryonic Stem Cell Model**

**Ioannis Bantounas, Filipa M. Lopes, Kirsty M. Rooney, Adrian S. Woolf, and Susan J. Kimber**

**Figure S1**

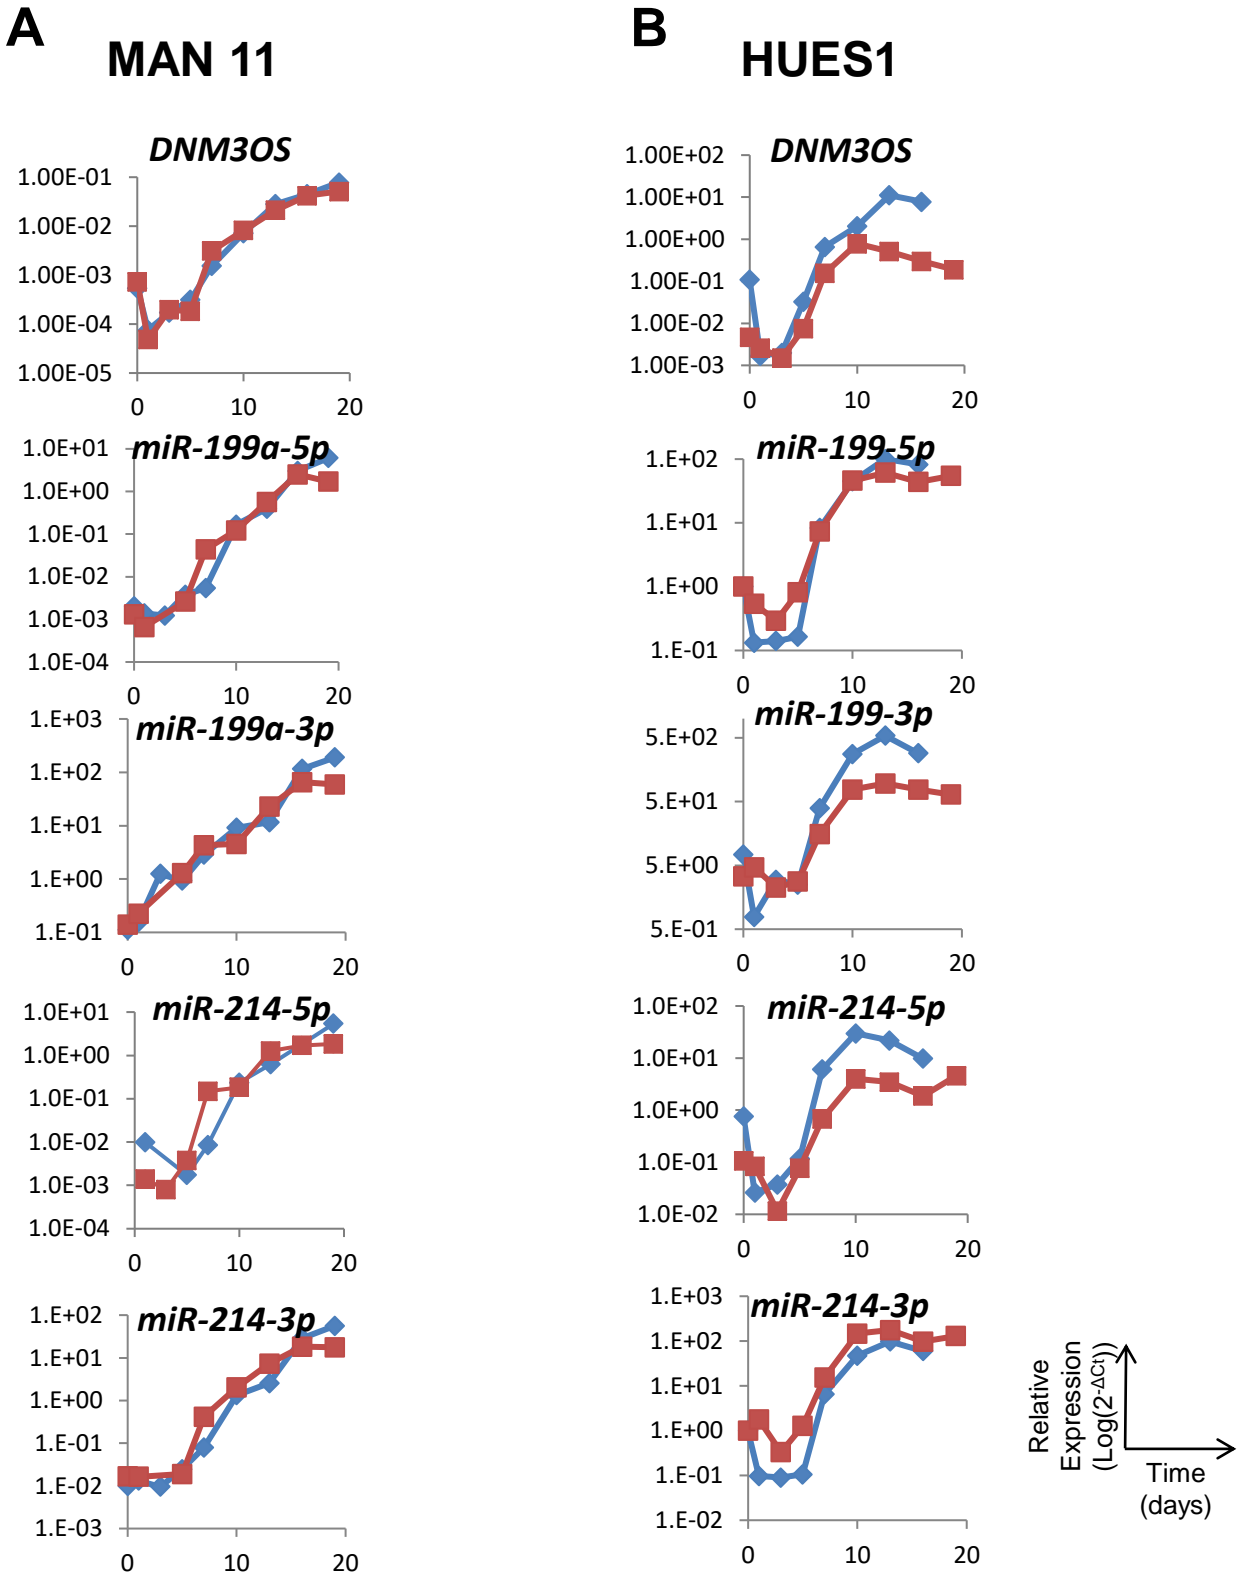

**Figure S1.** qPCR analysis of *miR-199a/214* cluster expression during 2D kidney differentiation

## Figure S2

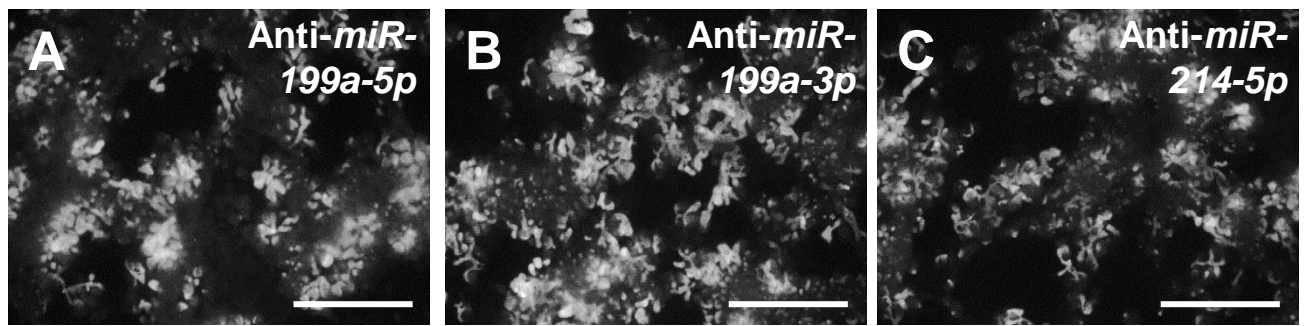

**Figure S2.** Inhibition of *miR-199a-5p*, *miR-199a-3p* or *miR-214-5p* by miRNA sponges in MAN13 differentiating 2D cultures

# Figure S3

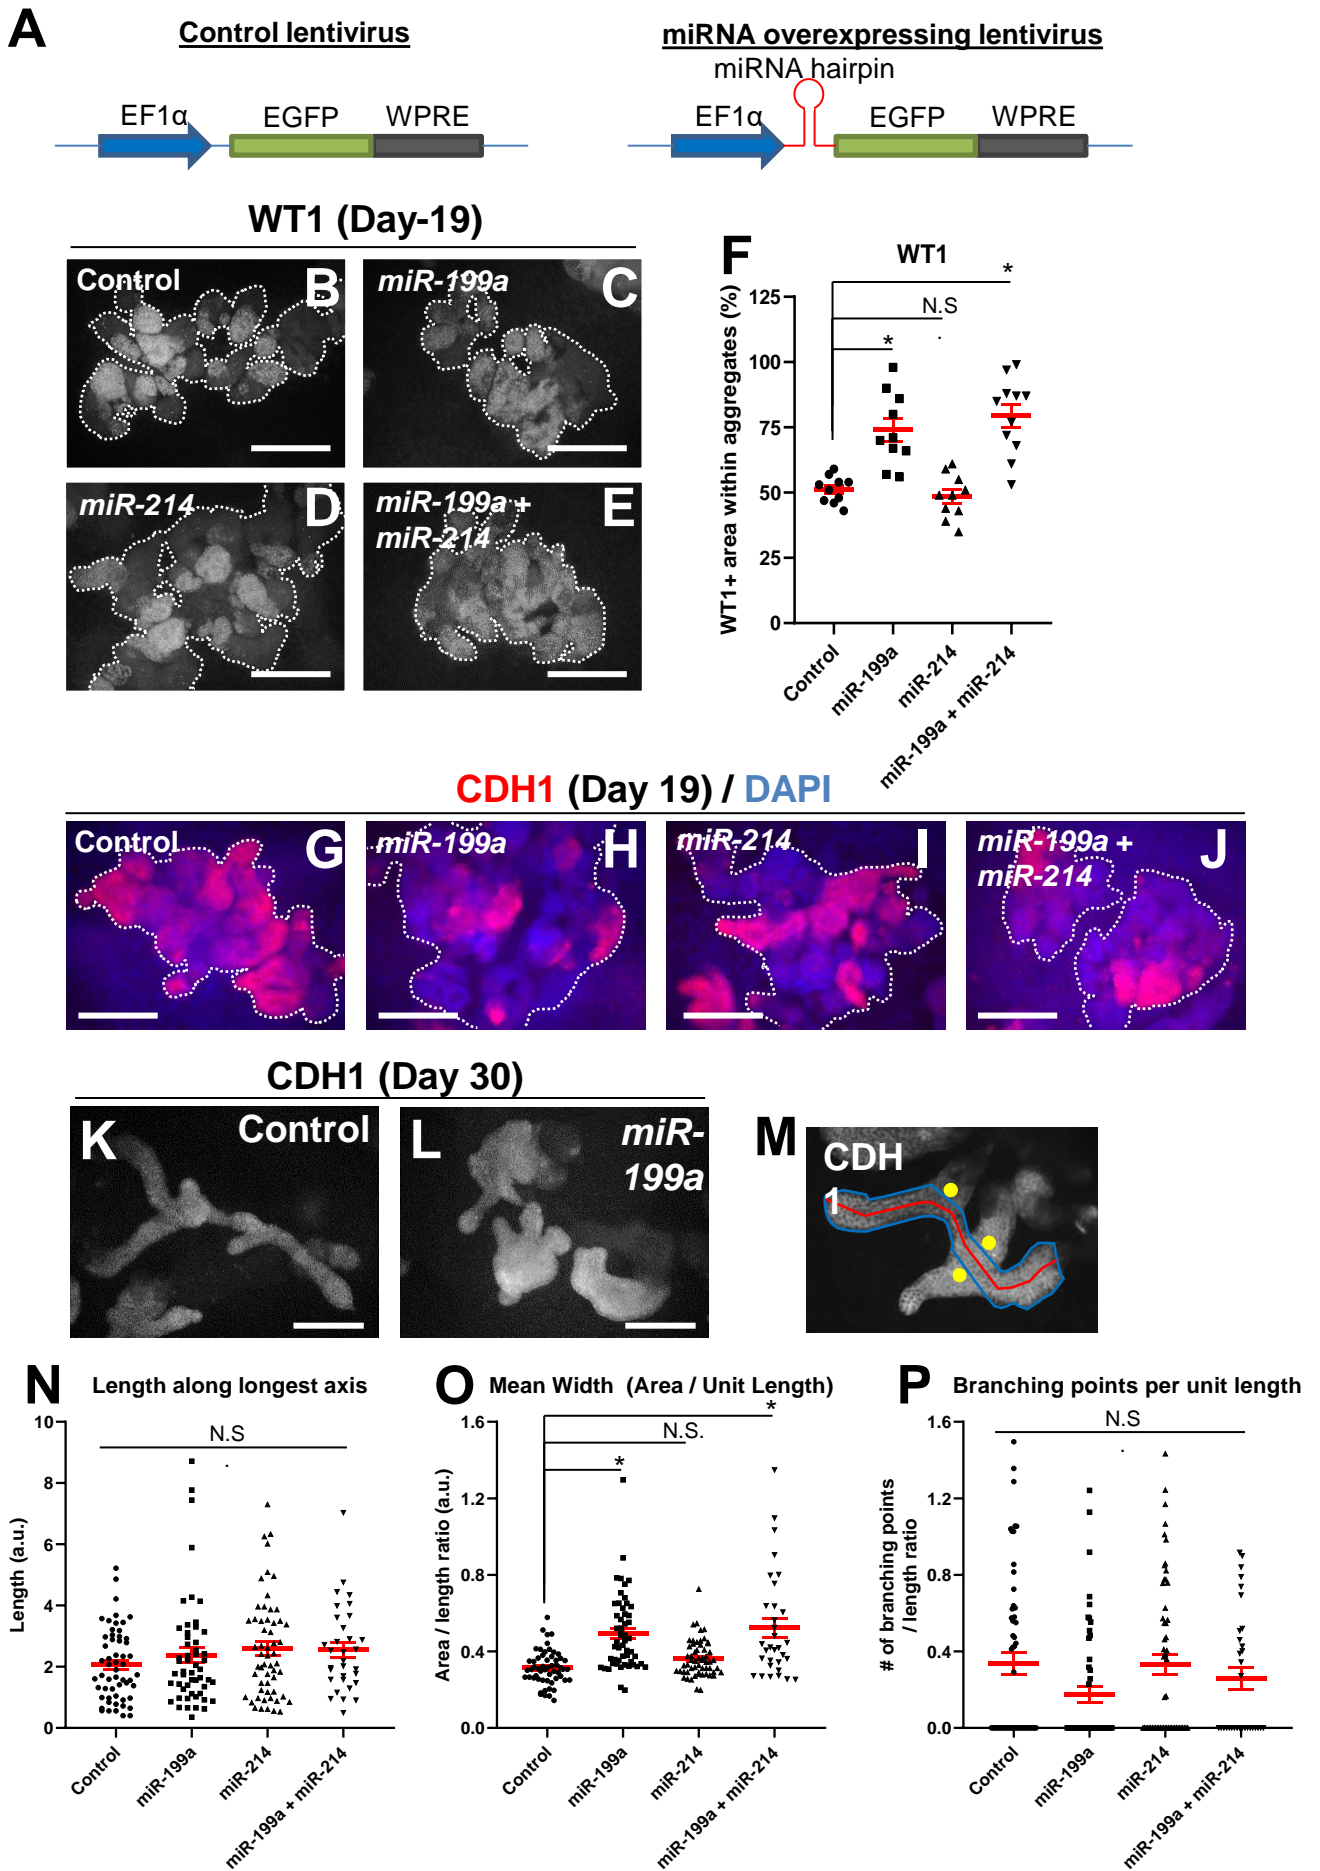

## Figure S4

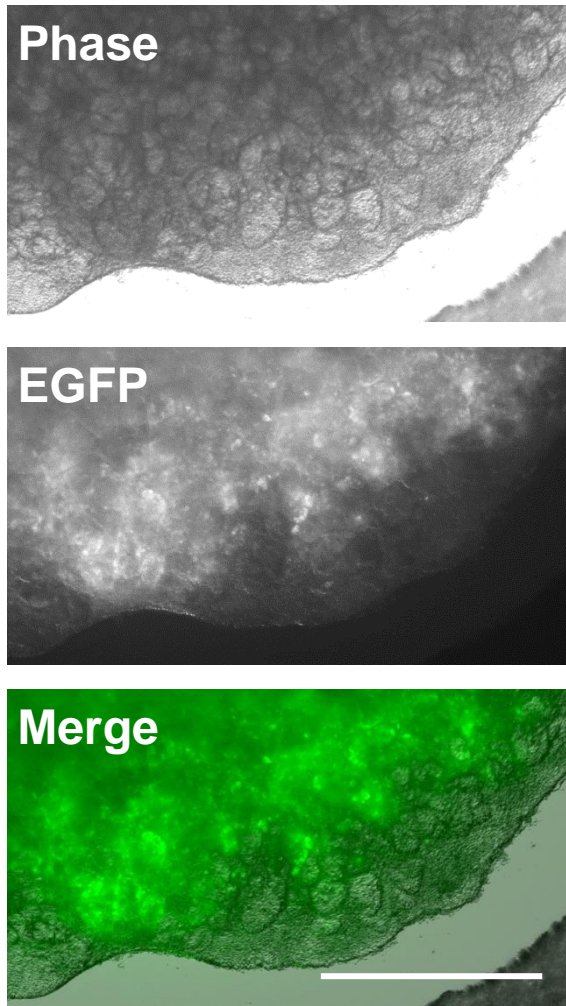

**Figure S4.** Lentiviral-mediated expression in 3D organoids.

**Figure S5**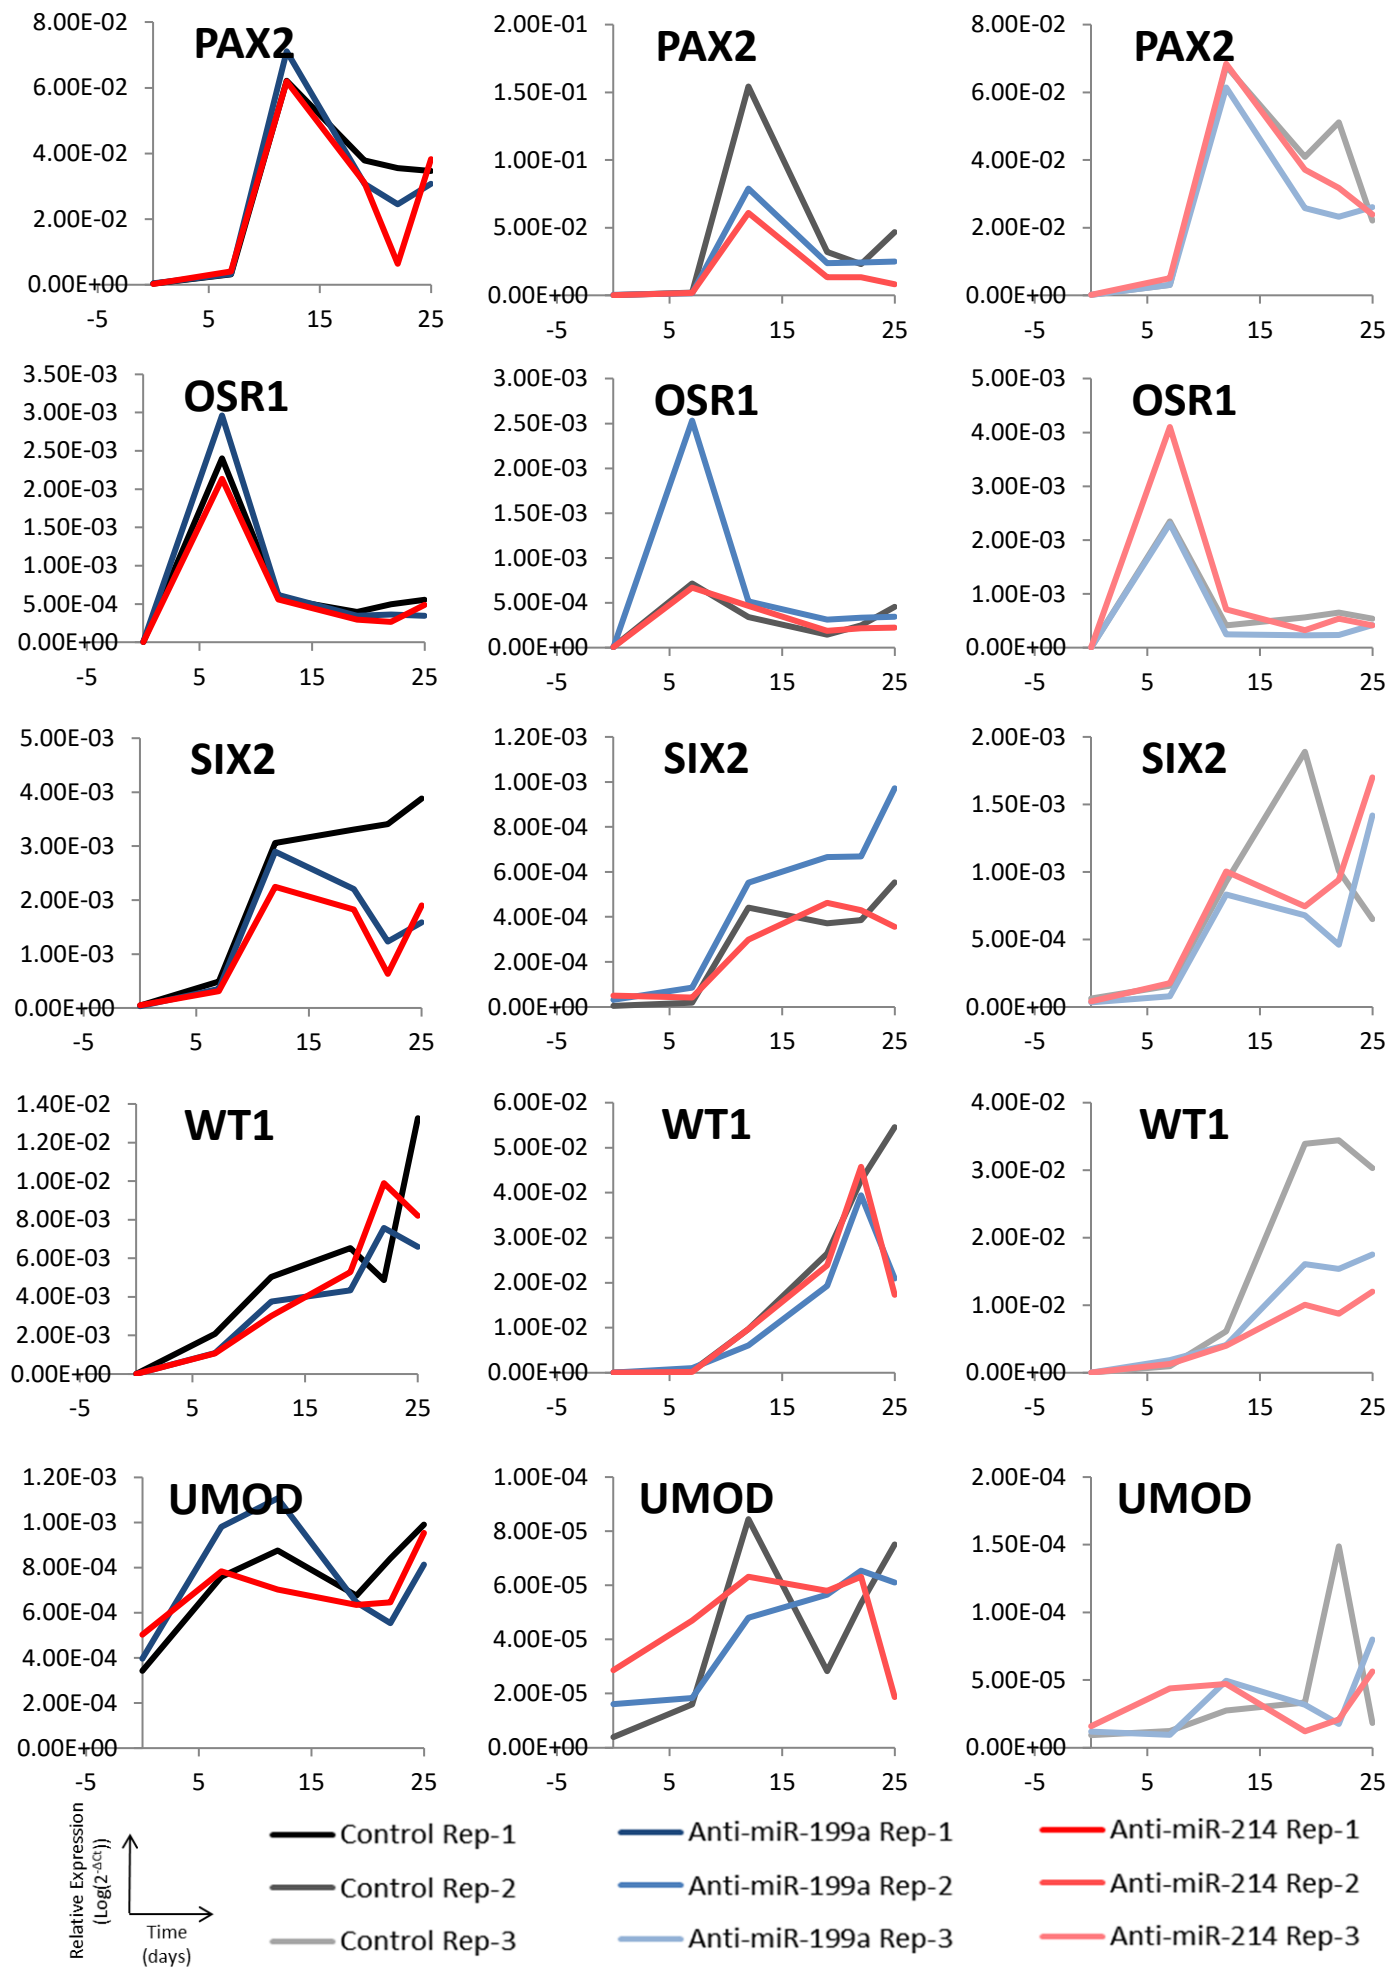

**Figure S5 (Continued)**

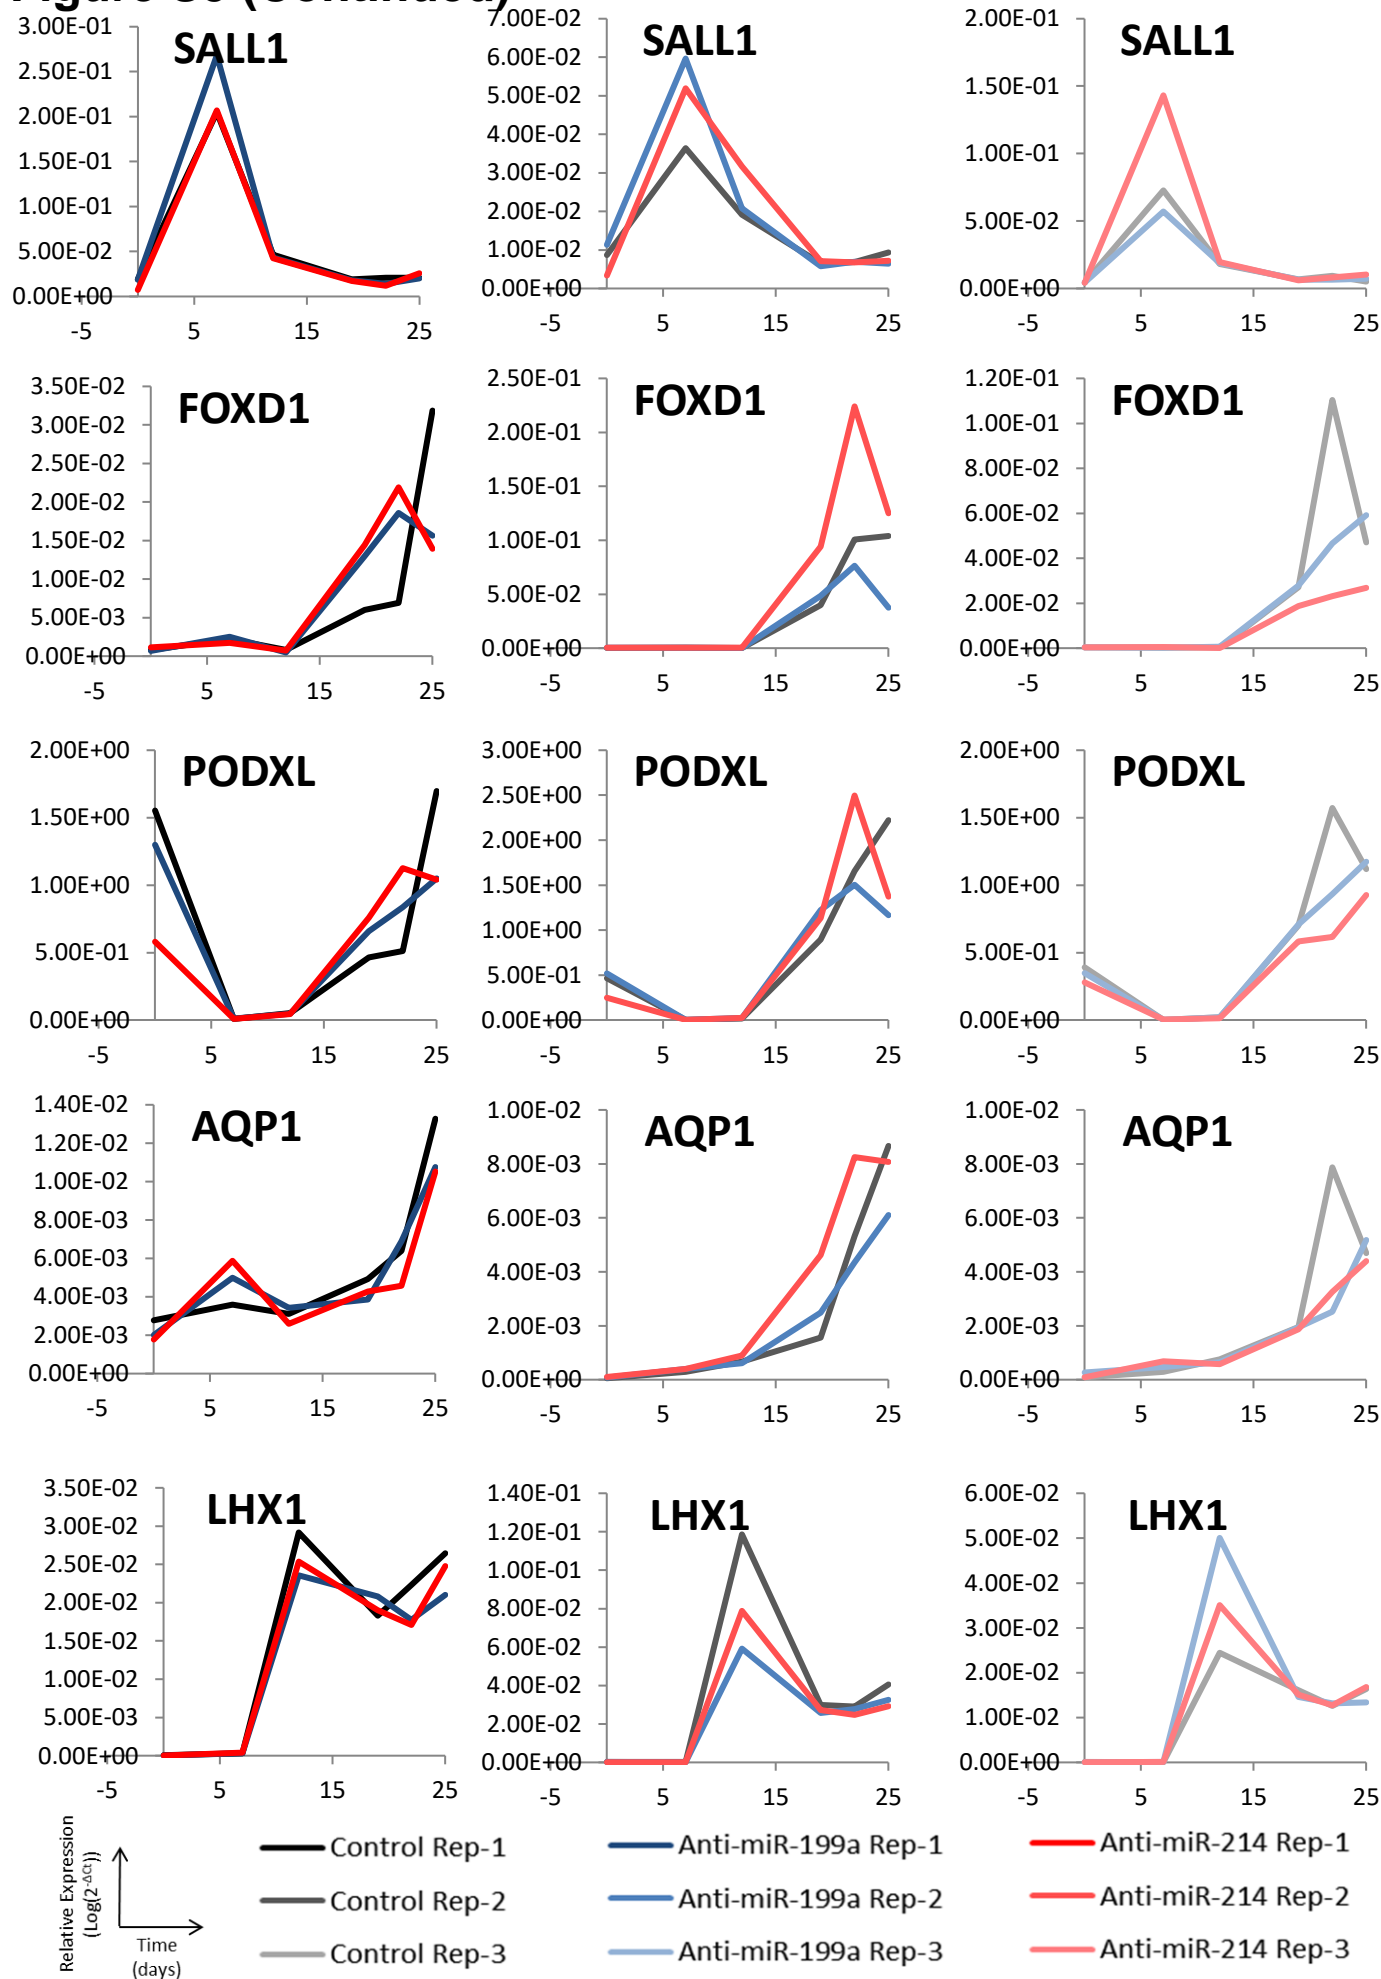

**Figure S5 (Continued)**

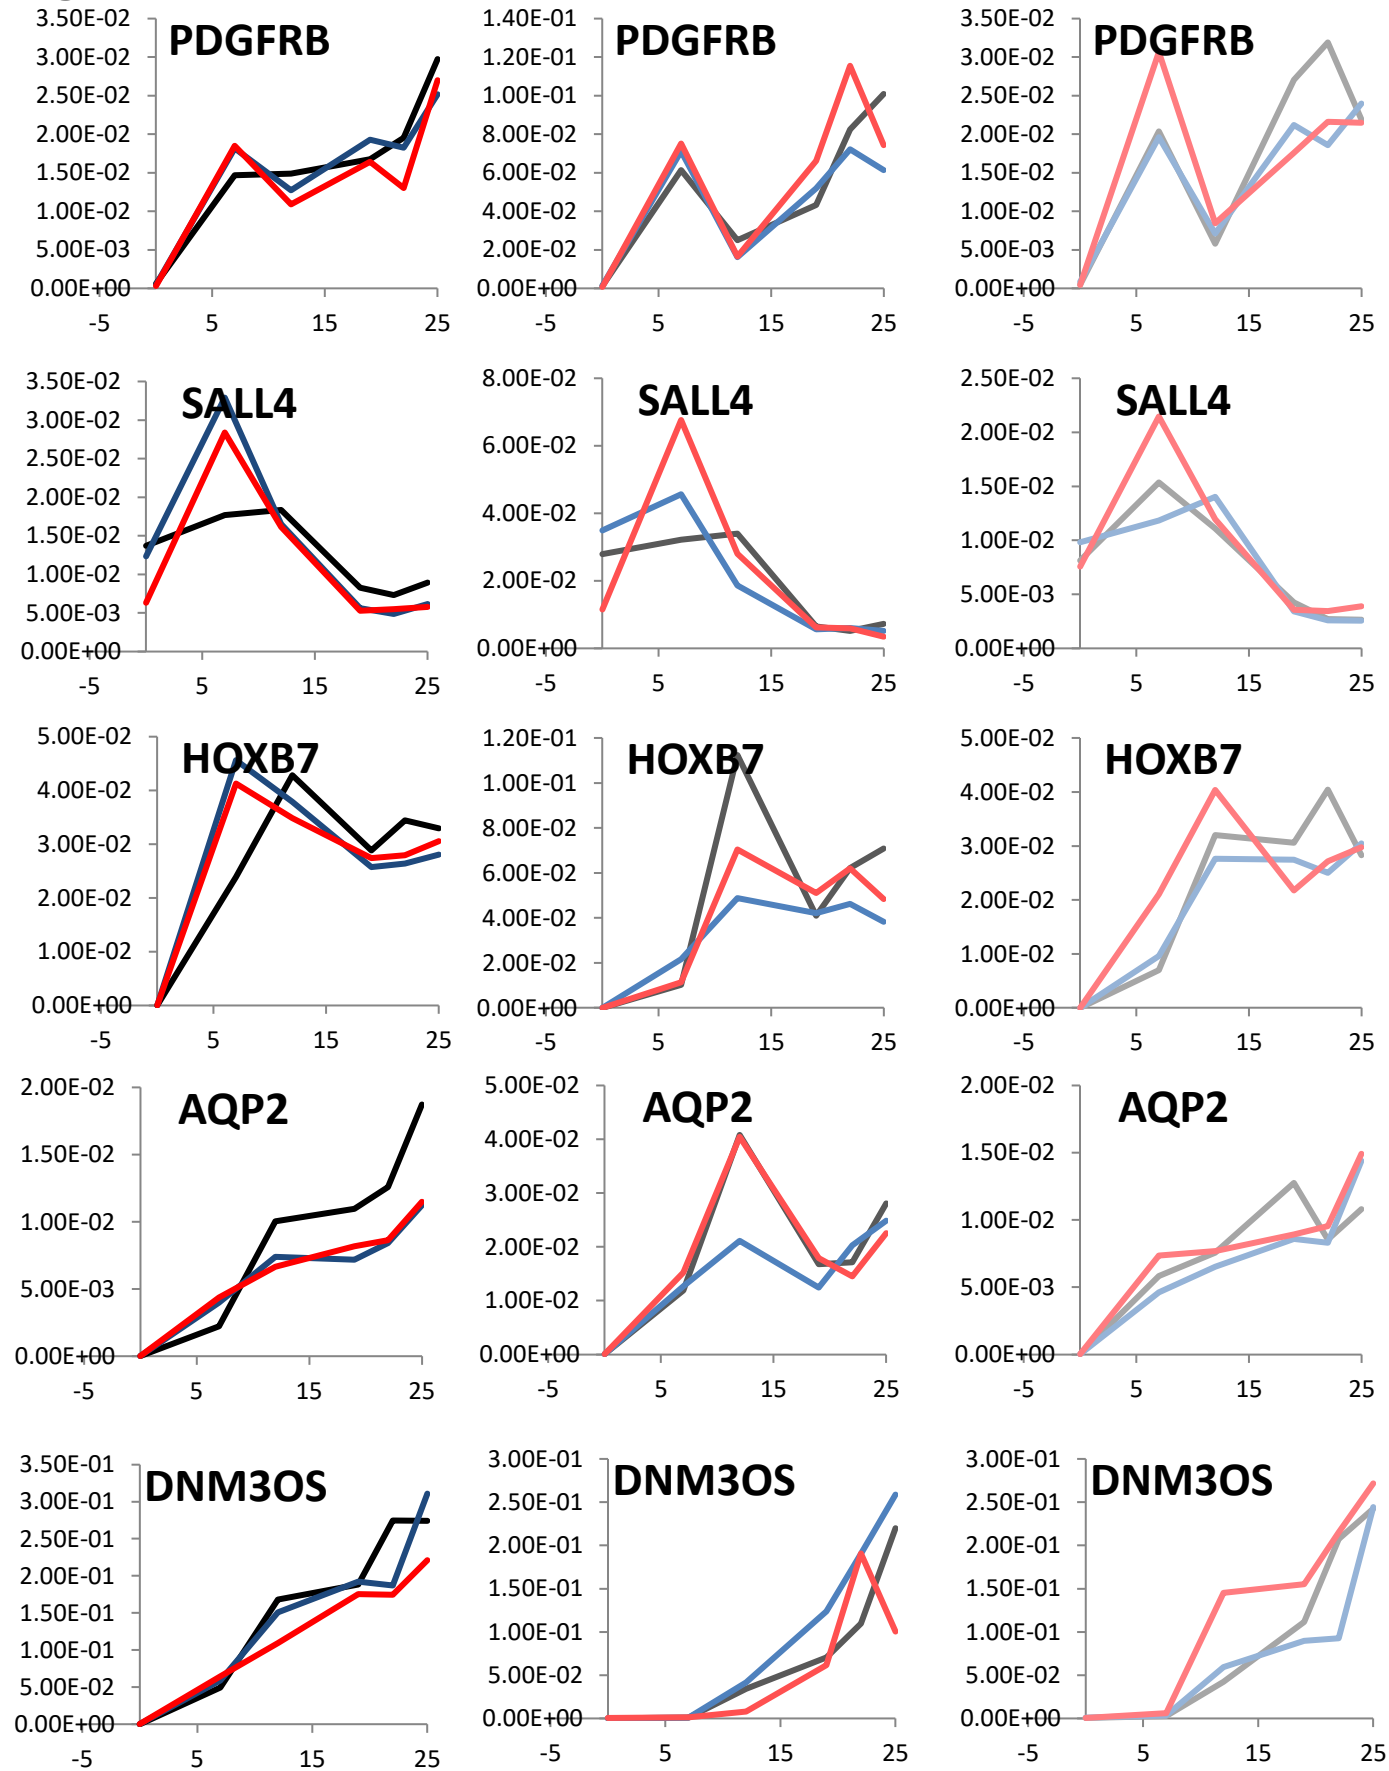

Relative Expression  
(Log<sub>2</sub><sup>-ΔC<sub>T</sub></sup>)

Time  
(days)

— Control Rep-1  
— Control Rep-2  
— Control Rep-3

— Anti-miR-199a Rep-1  
— Anti-miR-199a Rep-2  
— Anti-miR-199a Rep-3

— Anti-miR-214 Rep-1  
— Anti-miR-214 Rep-2  
— Anti-miR-214 Rep-3



**Figure S5 (Continued)**

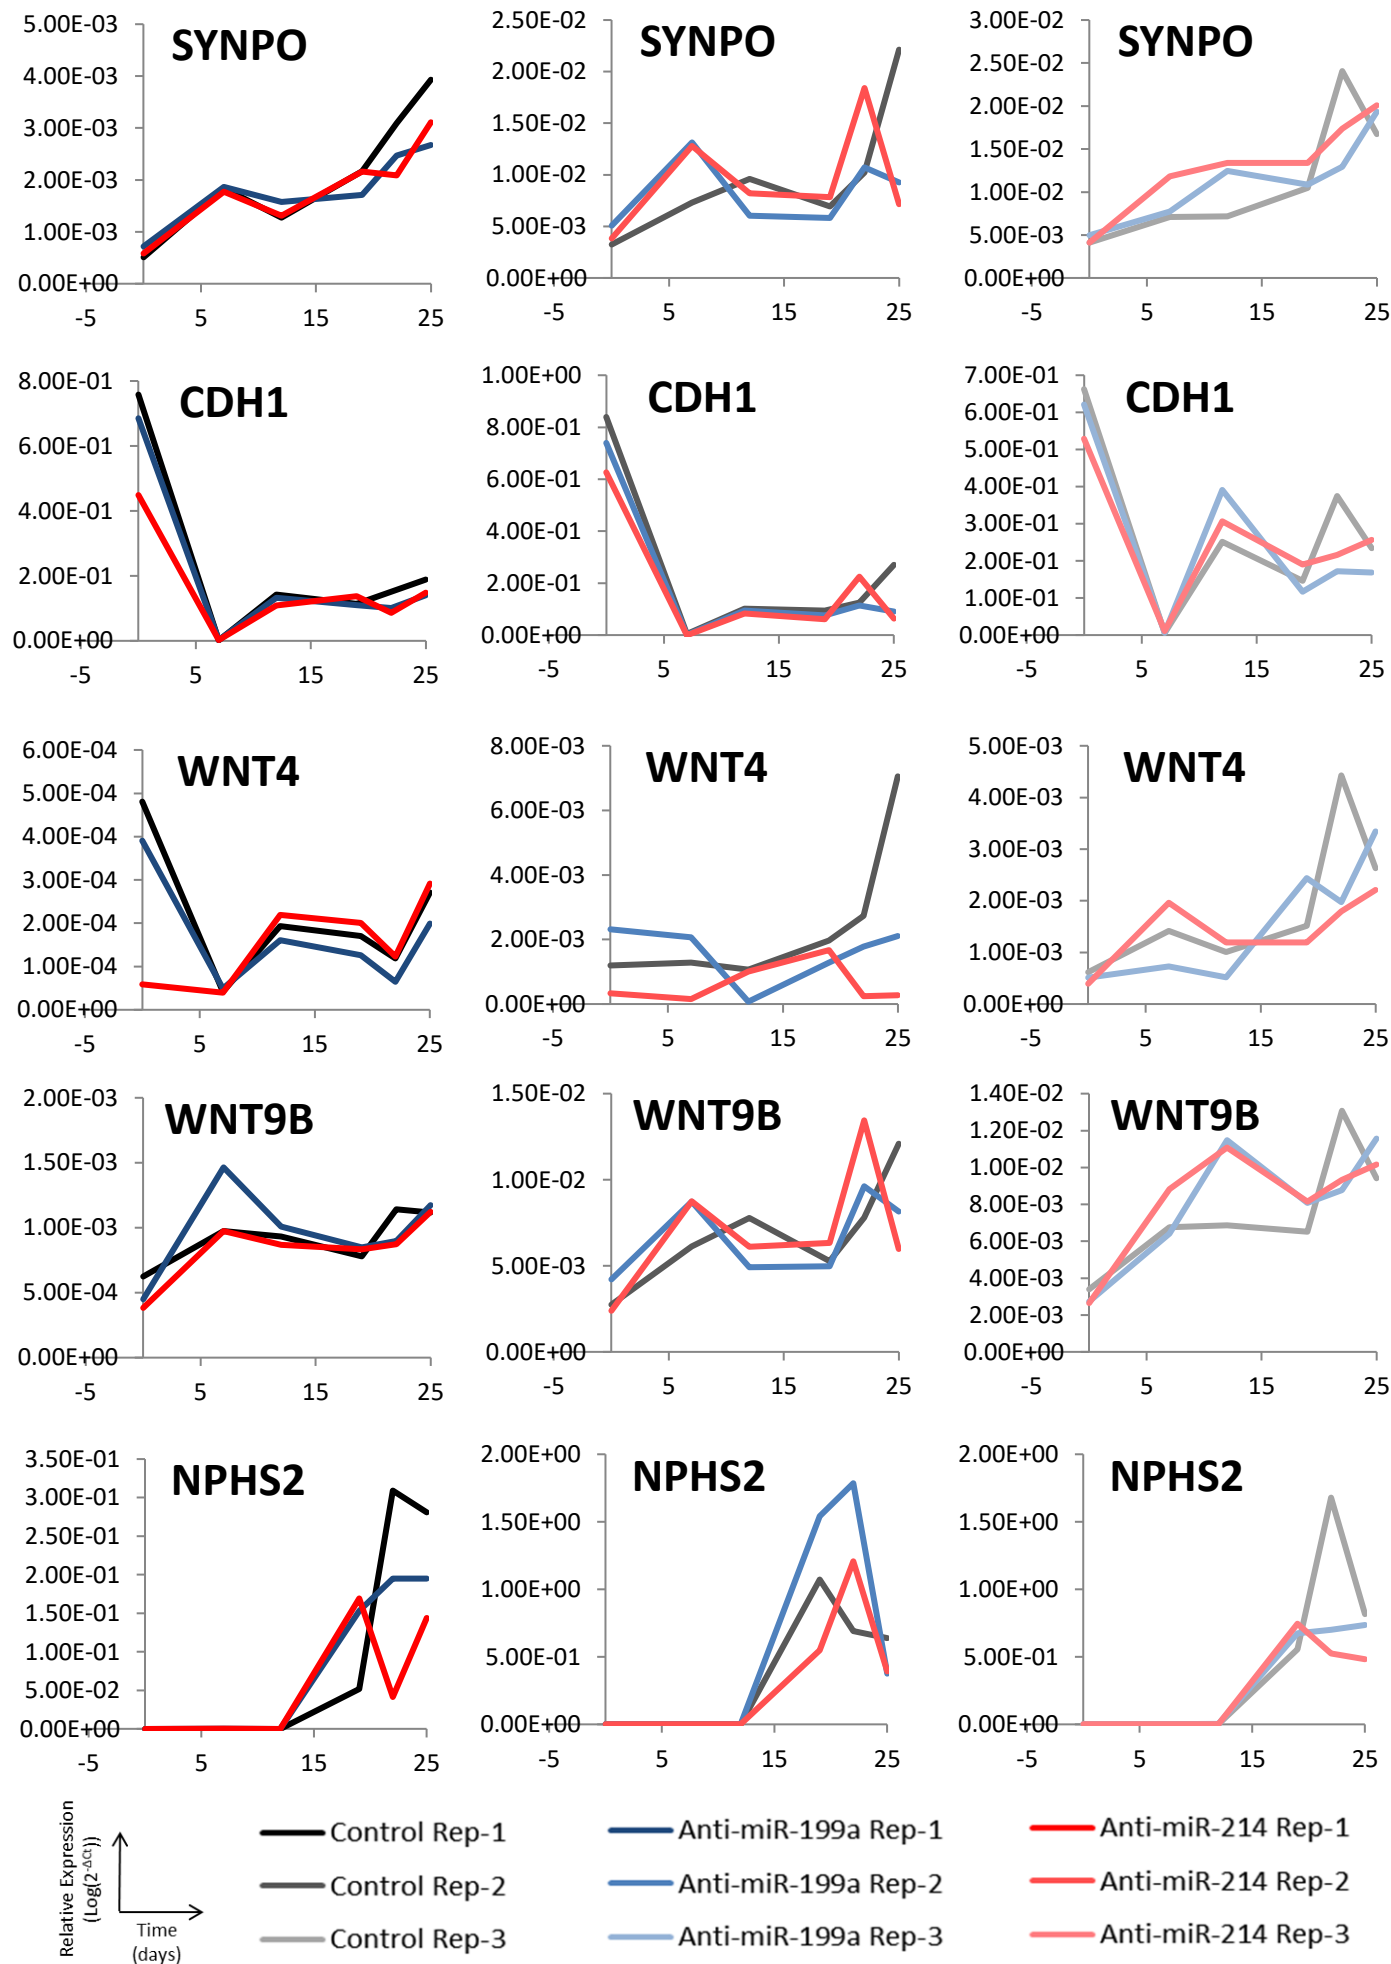

# Figure S5 (Continued)

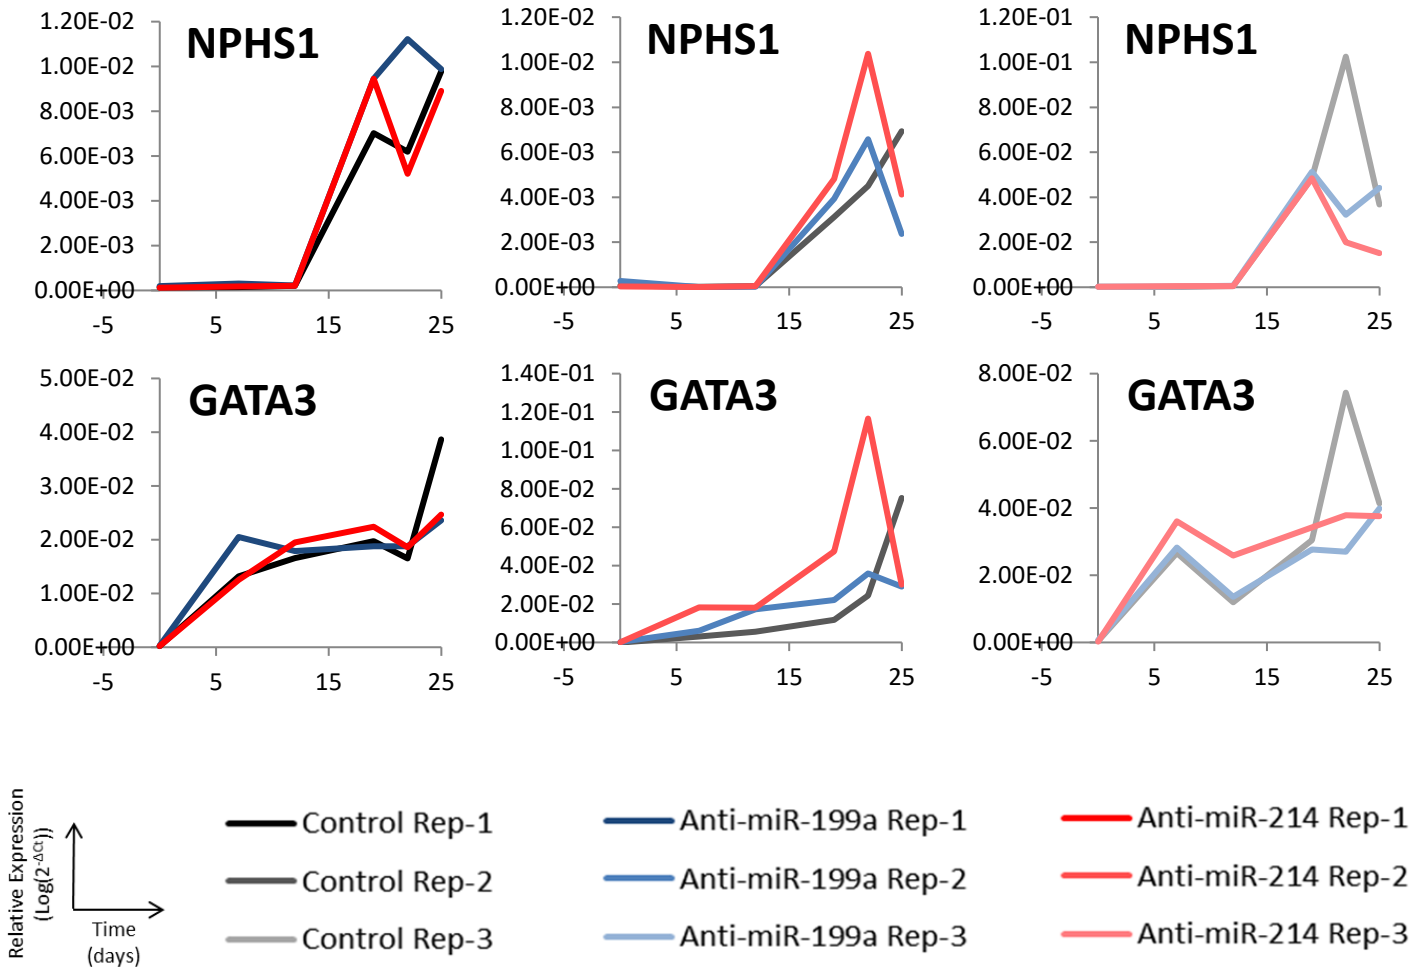

**Figure S5.** QPCR analysis of key marker gene expression in developing 3D kidney organoids derived from MAN13 hESCs transduced with either control or anti-miRNA sponge-expressing lentiviruses.

**Figure S6**

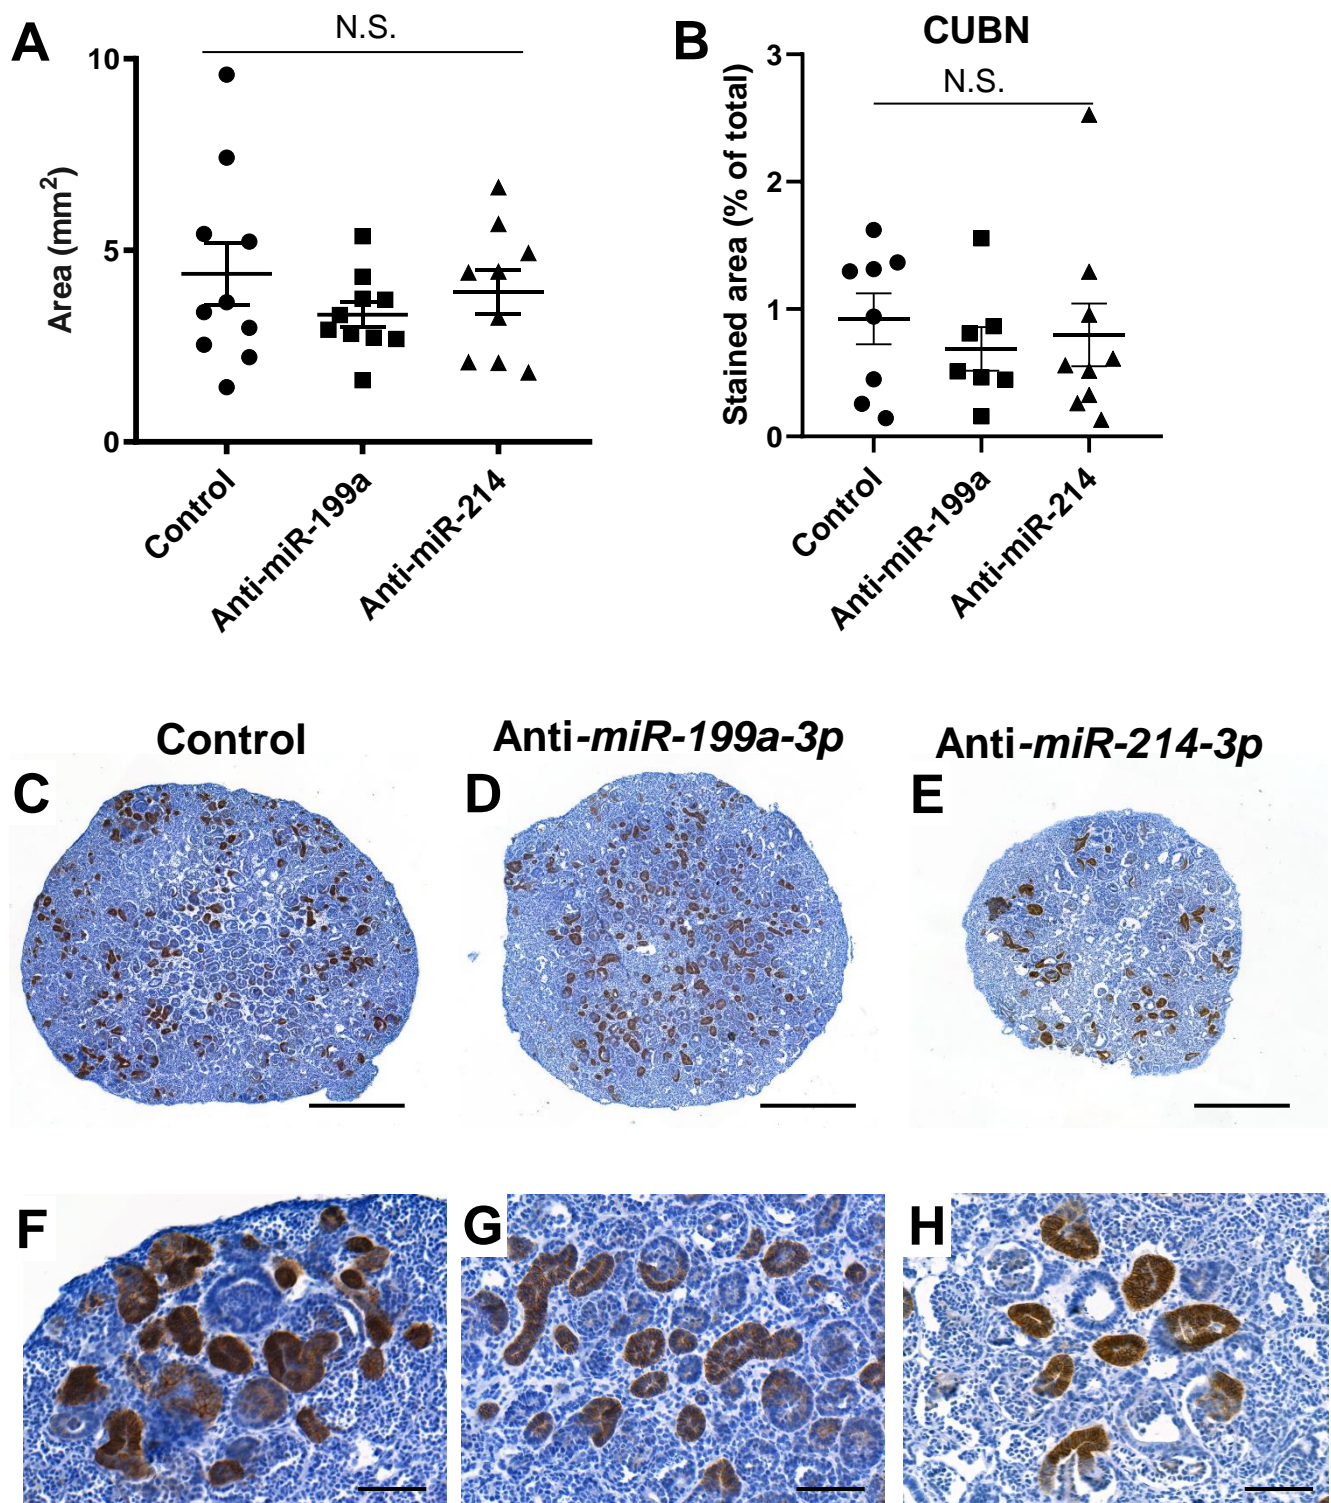

**Figure S6.** Size, total CUBN expression and CDH1 expression of anti-miRNA sponge-treated organoids.

**Figure S7**

**A**

**Anti-*miR-199a-3p***

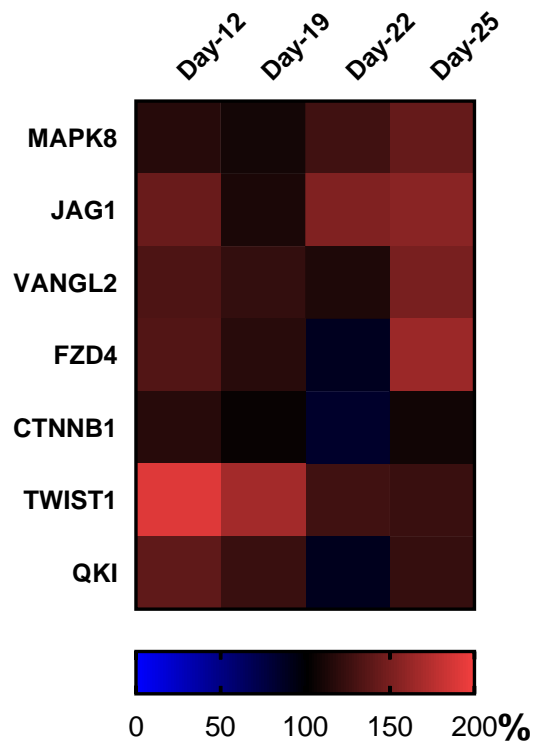

**B**

**Anti-*miR-214-3p***

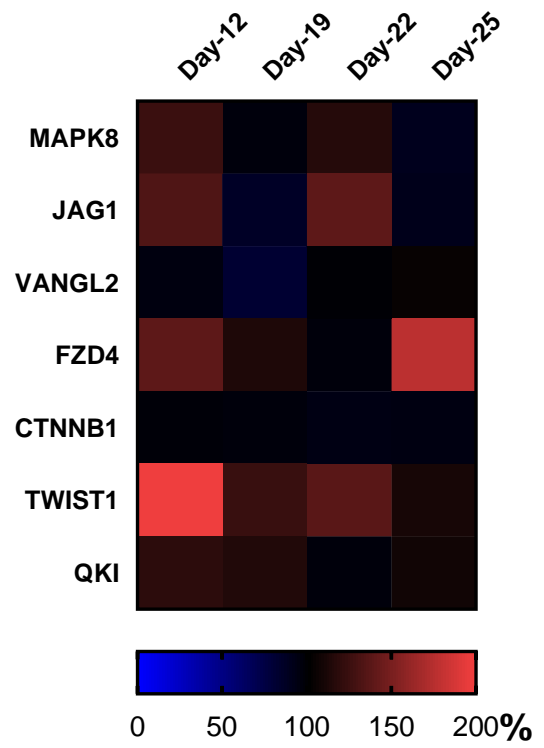

**Figure S7.** Derepression of targets of the *miR-199a/214* cluster, in the presence of anti-miRNA sponges..

## SUPPLEMENTAL FIGURE LEGENDS

**Figure S1** (Related to Figure 3). qPCR analysis of *miR-199a/214* cluster expression during 2D kidney differentiation in (A) MAN11 and (B) HUES1 hESCs. Different colours denote separate runs of the experiment.

**Figure S2** (Related to Figure 4). Inhibition of *miR-199a-5p*, *miR-199a-3p* or *miR-214-5p* by miRNA sponges in MAN13 differentiating 2D cultures did not alter the morphology of the developing epithelium, as shown by immunostaining with an anti-CDH1 antibody (compare to control in Figure 4).

**Figure S3.** (Related to Figure 4). Overexpression of *miR-199a* and *miR-214* in differentiating 2D cultures. MAN11 hESCs were transduced with either control or miRNA-overexpressing lentiviral vectors and differentiated to kidney in 2D (schematically shown in (A)). (B-E) Cultures were fixed at day 19 of differentiation and stained with antibodies against WT1. Overexpression of *miR-199a* or *miR-199a and miR-214 together* resulted in an increase of the WT1<sup>+</sup> cell population (MM) in emanating cell aggregates. Scale bars: 120µm. (F) Quantification of WT1<sup>+</sup> in kidney cell aggregates (one differentiation experiment; dots represent separate images taken from the same run of the experiment; mean±S.E.M. \*P<0.001, ANOVA followed by post-hoc t-tests). (G-J) Day 19 cultures were also immunostained for CDH1. Overexpression of *miR-199a* or *miR-199a and miR-214 together* resulted in a decrease of the CDH1<sup>+</sup> epithelia in emanating cell aggregates. (K-L) Cultures were also fixed at day 30 (end of protocol) and immunostained for CDH1, revealing a change in morphology of the epithelial structures, towards a more rounded, compact shape after *miR-199a overexpression*. Scale bar: 60µm. (M) Example cell aggregate with schematic overlay explaining the metrics used to quantify its shape, following overexpression of the miRNAs. Parameters measured were: The length of the aggregate along its longest CDH1<sup>+</sup> axis (red), quantified in (N); the ratio of the area of the main axis (blue) divided by the length (red), as a measure of how wide or elongated the aggregate was, quantified in (O); the number of branching points (yellow) per unit length of the main axis, quantified in (P). Overall, *miR-199a* overexpression (or overexpression of both miRNAs together) resulted in more rounded aggregates. Results in (N-P) are from one differentiation experiment, with between 32 and 57 aggregates measured per experimental group. Mean±S.E.M; \*P<0.001, Kruskal-Wallis followed by post-hoc Dunn's tests.

**Figure S4.** (Related to Figures 6 and 7). Lentiviral-mediated expression in 3D organoids. Example of a day 25 organoid, derived from MAN13 hESCs that were transduced with a lentiviral vector expressing an anti-miR-199a-3p sponge and an EGFP tag (see schematic representation of the vector in figure 3A). The transgenes continue to be expressed through to the end of the differentiation protocol, as shown by the persistence of the EGFP signal. Scale bars: 600µm.

**Figure S5.** (Related to Figures 6 and 7). QPCR analysis of key marker gene expression in developing 3D kidney organoids derived from MAN13 hESCs transduced with either control or anti-miRNA sponge-expressing lentiviruses. The results of three independent differentiation experiments are shown in each case. At least three organoids were pooled for each RNA sample, at each time point. Expression shown as  $2^{-\Delta Ct}$  relative to GAPDH against time.

**Figure S6.** (Related to Figures 6 and 7). Size, total CUBN expression and CDH1 expression of anti-miRNA sponge-treated organoids. (A) Quantification of the size of histological sections used in IHC experiments, showed that inhibition of *miRNA-199a-3p* or *miR-214-3p* activity had no effect on the overall mid-section area of organoids, reflecting their size. (Mean ± S.E.M.; each dot represents a separate organoid; organoids from three independent experiments were used; N.S.: Not significant, ANOVA). (B) Quantification of the extent of CUBN staining over entire histological sections showed that there was no significant change in the proportional area of CUBN<sup>+</sup> tubules (Mean ± S.E.M.; each dot represents a separate organoid; organoids from three independent experiments were used; N.S.: Not significant, ANOVA). (C-E) Low and (F-H) higher magnification representative images of sections from control and anti-miRNA sponge-treated organoids, immunostained for CDH1 (brown, over haematoxylin (blue) counterstain). Scale bars: A-C, 500µm; D-F, 100µm.

**Figure S7.** (Related to figures 6 and 7). Derepression of targets of the *miR-199a/214* cluster, in the presence of anti-miRNA sponges. (A, B) Heatmaps showing the derepression of key kidney developmental genes in anti-miRNA sponge treated organoids, during their differentiation. Gene expression was determined at different time points by qPCR, and each box of the map represents the change of expression relative to untreated controls (set at 100%, in each case). Each box on the map is the median of three independent differentiation experiments.

**SUPPLEMENTAL TABLES**

**Table S1. Antibodies used in immunocytochemical (ICC) and immunohistochemical (IHC) analyses. (Related to Experimental Procedures).**

| <b>Antibody</b> | <b>Host</b> | <b>Source</b>   | <b>Catalogue #</b> | <b>Application</b> | <b>Dilution</b> |
|-----------------|-------------|-----------------|--------------------|--------------------|-----------------|
| CUBN            | Goat        | Santa Cruz      | sc-20607           | IHC                | 1:100           |
| CDH1            | Mouse       | Abcam           | 76055              | ICC                | 1:300           |
|                 |             |                 |                    | IHC                | 1:1000          |
| MEIS1/2/3       | Mouse       | Active Motif    | 39796              | IHC                | 1:200           |
| PODXL           | Mouse       | R&D Systems     | MAB1658            | IHC                | 1:200           |
| PECAM1 (CD31)   | Mouse       | Cell Signalling | 3528               | IHC                | 1:100           |
| SYNPO (H-140)   | Rabbit      | Santa Cruz      | sc-50459           | IHC                | 1:200           |
| WT1             | Rabbit      | Santa Cruz      | sc-192             | ICC                | 1:100           |
| WT1             | Rabbit      | Calbiochem      | CA1026             | IHC                | 1:1000          |

**Table S2. Primers used for quantitative PCR. (Related to Experimental Procedures).**

| <b>Gene Name</b> | <b>Forward or Reverse</b> | <b>Sequence</b>           |
|------------------|---------------------------|---------------------------|
| AQP1             | Fwd                       | ATTAACCCTGCTCGGTCCTT      |
| AQP1             | Rev                       | ACCCTGGAGTTGATGTCGTC      |
| AQP2             | Fwd                       | GTGCGCCGAAAATTTCCA        |
| AQP2             | Rev                       | CCTCGACTTCTCCTTGAAGCA     |
| CDH1             | Fwd                       | CAATACATCTCCCTTCACAGCA    |
| CDH1             | Rev                       | AATGATAGATTCTTGGGTGGGTC   |
| CITED2           | Fwd                       | CACCAATGGGCTGCACCATCAC    |
| CITED2           | Rev                       | GCCGCTCGTGGCATTTCATGTTG   |
| CTNNB1           | Fwd                       | GCCACAAGATTACAAGAAACGG    |
| CTNNB1           | Rev                       | CAAGATCAGCAGTCTCATTTCCA   |
| DNM3OS           | Fwd                       | CTTACAATGCTTCCACTTCTCTG   |
| DNM3OS           | Rev                       | TCTGCCTTCGTTTACAAATTC     |
| FZD4             | Fwd                       | CTGACAACCTTTCACACCGCT     |
| FZD4             | Rev                       | CATTGGCACATAAACAGAACAAAGG |
| GAPDH            | Fwd                       | AGCCACATCGCTCAGACAC       |
| GAPDH            | Rev                       | GCCAATACGACCAAATCC        |
| GATA3            | Fwd                       | GCCCCTCATTAAGCCCAAG       |
| GATA3            | Rev                       | TTGTGGTGGTCTGACAGTTTCG    |
| HOXB7            | Fwd                       | GCCTACAAATCATCCGGCCA      |
| HOXB7            | Rev                       | GGTTGGAAGCAAACGCACAA      |
| JAG1             | Fwd                       | CTTACCTTGTGCCTTTGGA       |
| JAG1             | Rev                       | GGTCTCCCTGAAACTTCCTG      |
| LHX1             | Fwd                       | ATGCAACCTGACCGAGAAGT      |

|        |     |                           |
|--------|-----|---------------------------|
| LHX1   | Rev | CAGGTCGCTAGGGGAGATG       |
| MAPK8  | Fwd | CTCTCCTTTAGGTGCAGCAG      |
| MAPK8  | Rev | CGGATCTGTTGACATTGAAGAC    |
| NPHS1  | Fwd | AGTGTGGCTAAGGGATTACCC     |
| NPHS1  | Rev | TCACCGTGAATGTTCTGTTCC     |
| NPHS2  | Fwd | CAAAGTGCGGATGATTGCTG      |
| NPHS2  | Rev | GTGTGGAGGTATCGAAGCTG      |
| OSR1   | Fwd | CTCCTCGAGATCCGGATTGAG     |
| OSR1   | Rev | GTTCACTGCCTGAAGGAAGG      |
| PAX2   | Fwd | GCAACCCCGCCTTACTAAT       |
| PAX2   | Rev | AACTAGTGGCGGTCATAGGC      |
| PDGFRB | Fwd | GCCGTCAAGATGCTTAAATCC     |
| PDGFRB | Rev | TATAGATGGGTCCTCCTTTGGT    |
| PODXL  | Fwd | TCATCATCACCATCGTCTGC      |
| PODXL  | Rev | CCACCTTCTTCTCCTGCATC      |
| QKI    | Fwd | CTGATGAACGACAAGAAGCTC     |
| QKI    | Rev | CGTACTCTGCTAATTTCTTCGTC   |
| SALL1  | Fwd | AGCGAAGCCTCAACATTTCCAATCC |
| SALL1  | Rev | AATTCAAAGAACTCGGCACAGCACC |
| SALL4  | Fwd | CAGATCCACGAGCGGACTCA      |
| SALL4  | Rev | CCCCGTGTGTCATGTAGTGA      |
| SIX2   | Fwd | CGCCCATGTGGGTCAGTGGG      |
| SIX2   | Rev | AGCCGGGAGCGCTGTAGTCA      |
| SYNPO  | Fwd | CATGGTGGAAAGGAGGATGATGG   |
| SYNPO  | Rev | ACTTGGGGTTCGGAGCTGGGATAC  |
| TWIST1 | Fwd | CTTCTCGGTCTGGAGGATGG      |
| TWIST1 | Rev | TTCTCCTTCTCTGGAAACAATGAC  |
| UMOD   | Fwd | AACATCACTGATATCTCCCTCCT   |
| UMOD   | Rev | TTGTCTCTGTCATTGAAGCCC     |
| VANGL2 | Fwd | GATGAGCGGGATGACAACCTG     |
| VANGL2 | Rev | GTGTGAGGTCATCATGGGAG      |
| WNT4   | Fwd | ACCTGGAAGTCATGGACTCG      |
| WNT4   | Rev | TCAGAGCATCCTGACCACTG      |
| WNT9B  | Fwd | AGTACAGCACCAAGTTTCTGAG    |
| WNT9B  | Rev | ACTCTTCACAGCCTTGATGC      |
| WT1    | Fwd | GGCAGCACAGTGTGTGAACT      |
| WT1    | Rev | CCAGGCACACCTGGTAGTTT      |

## SUPPLEMENTAL EXPERIMENTAL PROCEDURES

### *Quantitative PCR*

QPCR for the *DNM3OS* and protein-coding transcripts was performed using the TaqMan® RNA-to-Ct™ 1-Step Kit (ThermoFisher, #4392653) according to the manufacturer's instructions, on a BioRad C1000™ Thermal Cycler fitted with a CFX384™ Real Time System, using 15ng of RNA per reaction. GAPDH was used as the housekeeping gene to normalise readings between samples. Primers used are listed in Table S2.

For mature miRNA detection, the following TaqMan™ miRNA Assays (ThermoFisher, #4366597) were used: *hsa-miR-199a* (assay number #000498), *hsa-miR-199a\** (assay number #000499), *hsa-miR-214* (assay number #002306), *hsa-miR-214\** (assay number #002293). All readings were normalised against the *RNU6b* (assay number #001093). Ten ng of RNA were reverse transcribed in a 15µl reaction, using the TaqMan™ MicroRNA Reverse Transcription kit (ThermoFisher #4366596) and the RT primer of the appropriate miRNA assay according to the manufacturer's instructions. For the PCR, 1µl of the RT reaction was amplified in a total volume of 15µl, using the appropriate miRNA Assay mix and TaqMan™ Universal Mastermix II, no UNG (ThermoFisher, #4440040) according to the manufacturer's instructions.

### *In situ hybridisation of miRNA in kidney tissue and 3D organoid sections*

3D organoids were fixed in 4% paraformaldehyde, embedded in paraffin and sectioned at 5 µm. Digoxigenin-labelled miRCURY LNA® probes against *miR-199a-3p* (#YD00615410) and *miR-214-3p* (#YD00611471) and a control scrambled probe (#YD00699004) were purchased from QIAGEN and used according to the manufacturer's instructions. Proteinase K (QIAGEN, miRCURY LNA miRNA ISH Buffer Set (FFPE), #339450) treatment was for 10min, at 0.33x strength, at 37°C. Scrambled and anti-*miR-199a* probes were used at a final concentration of 40nM, whereas the anti-*miR-214-3p* probe was used at 1nM at a hybridisation temperature of 55°C. An alkaline phosphatase-linked, sheep anti-digoxigenin antibody (Sigma-Aldrich, #11093274910) was then used at 1:400 dilution. The alkaline phosphatase catalysed reaction was allowed to proceed for 2h followed by counterstaining with Nuclear Fast Red. Images were acquired on a 3D-Histech Panoramic-250 microscope slide-scanner using a 40x/0.95 Plan Apochromat objective (Zeiss). Snapshots of the slide-scans were taken using the Case Viewer software (3D-Histech).

### *Immunostaining of 2D cultures*

Cells were washed twice in PBS and then fixed in 4% paraformaldehyde (PFA) for 20 minutes, followed by another two PBS washes. The fixed cells were blocked and permeabilised for 30 min with 3% bovine serum albumin (BSA)/0.3% Triton-X in PBS before overnight incubation at 4°C with primary antibodies (Table S1) diluted in 3% BSA/PBS. They were then washed three times with PBS/0.1% Triton-X, followed by Alexa-Fluor™-488- or Alexa-Fluor™-594-labelled, anti-mouse or anti-rabbit (as needed) (Life Technologies; 1:300 dilution in 3% BSA/PBS). Images were captured on an Olympus IX-71 inverted fluorescence microscope and captured using a QImaging Retiga SRV camera. Images were then processed and analysed using ImageJ (<http://imagej.net/Fiji/Downloads>).

### *Immunohistochemistry on 3D organoid sections*

Tissue was fixed in 4% paraformaldehyde, embedded in paraffin and sectioned at 5 µm. Sections were dewaxed and rehydrated. After rehydration, slides were boiled in an 800W microwave in 10 mM sodium citrate buffer (pH 6.0). After cooling to room temperature, endogenous peroxidase activity was blocked using 0.3% H<sub>2</sub>O<sub>2</sub> in PBS for 10 minutes. Sections were permeabilized using 0.2% Triton X-100 (Sigma-Aldrich) for 10 minutes and blocked using 1% bovine serum albumin (BSA) with 10% serum from the species in which the secondary antibody was raised. Sections were incubated overnight at 4°C with the primary antibody + 1% BSA. Primary antibodies used are listed in Table S1. Biotin-conjugated species specific secondary antibodies with 1% BSA were incubated at room temperature for 2 hours. Following



PBS washes, slides were incubated in avidin-biotin enzyme complex (Vector Laboratories VECTASTAIN Elite ABC Reagent, PK-6100) for 1 hour at room temperature. Peroxidase activity was detected with the 3, 3'-diaminobenzidine (DAB) peroxidase substrate solution (Vector Laboratories, SK4100). Images were acquired on a 3D-Histech Panoramic-250 microscope slide-scanner using a 40x/0.95 Plan Apochromat objective (Zeiss). Snapshots of the slide-scans were taken using the Case Viewer software (3D-Histech).

#### *Lentiviral vector production and hESC transduction*

Briefly, HEK-293T cells were transfected by calcium phosphate precipitation, in 15cm dishes, at 50% confluency, with 10 $\mu$ g shuttle plasmid, 10 $\mu$ g pMDLg-pRRE, 3.4 $\mu$ g pMD2.G and 2 $\mu$ g pRSV-Rev per dish. Cell medium was collected over two days and centrifuged at 6,000g overnight, the pellet resuspended in PBS and the new suspension centrifuged in a SW40-Ti rotor (Beckman Coulter Ltd, High Wycombe, UK) at 50,000g for 90min. Finally, the resulting pellet was resuspended in PBS, at 1:2,000 of the original medium volume. The viral titre was calculated by FACS (detecting EGFP fluorescence) on HEK-293T cells transduced with serial dilutions of the viral preparations.

#### *Combined KEGG pathway / miRNA-target prediction analysis*

Version 2 of the DIANA miRPath software was used (Vlachos et al., 2012). The four mature species of the human *miR-199a/214* cluster (*hsa-miR-199a-5p*, *hsa-miR-199a-3p*, *has-miR-214-5p*, *hsa-miR-214-3p*) were used as input.
