# Supplementary material for: The miR-199a/214 Cluster Controls Nephrogenesis and Vascularization in a Human Embryonic Stem Cell Model
Source: PubMed Central journal article supplement — Stem Cell Reports. 2020 Dec 10;16(1):134–48. doi: 10.1016/j.stemcr.2020.11.007 (PMC7897558; doi:10.1016/j.stemcr.2020.11.007), 2020-12-10
Supplement: mmc2.pdf [file mmc2.pdf]

# The *miR-199a/214* Cluster Controls Nephrogenesis and Vascularization in a Human Embryonic Stem Cell Model

Ioannis Bantounas,<sup>1,\*</sup> Filipa M. Lopes,<sup>1</sup> Kirsty M. Rooney,<sup>1</sup> Adrian S. Woolf,<sup>1,2</sup> and Susan J. Kimber<sup>1,\*</sup>

<sup>1</sup>Division of Cell Matrix Biology and Regenerative Medicine, Faculty of Biology, Medicine and Health, University of Manchester, and the Manchester Academic Health Science Centre, Manchester, UK

<sup>2</sup>Royal Manchester Children's Hospital, Manchester University NHS Foundation Trust, Manchester, UK

\*Correspondence: [ioannis.bantounas@manchester.ac.uk](mailto:ioannis.bantounas@manchester.ac.uk) (I.B.), [sue.kimber@manchester.ac.uk](mailto:sue.kimber@manchester.ac.uk) (S.J.K.)

<https://doi.org/10.1016/j.stemcr.2020.11.007>

## SUMMARY

MicroRNAs (miRNAs) are gene expression regulators and they have been implicated in acquired kidney diseases and in renal development, mostly through animal studies. We hypothesized that the *miR-199a/214* cluster regulates human kidney development. We detected its expression in human embryonic kidneys by *in situ* hybridization. To mechanistically study the cluster, we used 2D and 3D human embryonic stem cell (hESC) models of kidney development. After confirming expression in each model, we inhibited the miRNAs using lentivirally transduced miRNA sponges. This reduced the WT1<sup>+</sup> metanephric mesenchyme domain in 2D cultures. Sponges did not prevent the formation of 3D kidney-like organoids. These organoids, however, contained dysmorphic glomeruli, downregulated *WT1*, aberrant proximal tubules, and increased interstitial capillaries. Thus, the *miR-199a/214* cluster fine-tunes differentiation of both metanephric mesenchymal-derived nephrons and kidney endothelia. While clinical implications require further study, it is noted that patients with heterozygous deletions encompassing this miRNA locus can have malformed kidneys.

## INTRODUCTION

MicroRNAs (miRNAs) are small (20–25 nucleotides) RNAs that regulate gene expression by binding to the 3' UTRs of their target gene mRNA and inhibiting their translation and/or causing their degradation (Bartel, 2009; Filipowicz et al., 2008). Diverse studies, mostly in animal models, are implicating miRNAs in acquired kidney diseases and in renal development (Jones et al., 2018; Nakagawa et al., 2015; Sankrityayan et al., 2019; Shaffi et al., 2018; Trionfini et al., 2015; Zhao et al., 2019). *MiR-199a* and *miR-214* are transcribed as part of the long non-coding RNA *dynamin 3 opposite strand (DNM3OS)*, from which they are excised to yield their mature forms (Lee et al., 2009) and they have been found to be involved in the development and disease of various tissues. As examples, *miR-199a* is involved in osteogenesis, chondrogenesis, and adipogenesis, and in the stress response to hypoxia in the heart, lung, and brain (Gu and Chan, 2012), while *miR-214* participates in muscle, bone, pancreatic, and nervous system development (Chen et al., 2010; Flynt et al., 2007; Joglekar et al., 2007; Shi et al., 2013; Sun et al., 2018; Watanabe et al., 2008) and protects against heart ischemia (Aurora et al., 2012). More recently, expression and possible roles for miRNAs have begun to be investigated in the kidney. Indeed, a number of groups have recently implicated miRNAs in genetic diseases of the kidney (Trionfini et al., 2015). The *miR-17-92* cluster has been shown to be important in the regulation of nephron progenitors in mice. *miR-19b* in the cluster suppresses the *cystic fibrosis transmembrane conductance regulator (Cftr)* gene, in murine nephron pro-

genitors, and misregulation of this gene causes changes in proliferation of the progenitors (Marrone et al., 2014; Phua et al., 2019). Knockout studies revealed a requirement for *miR-210* through its regulation of Wnt signaling in the development of normal nephron numbers in male mice (Hemker et al., 2020). An anti-inflammatory/anti-cystic role for *miR-214* in autosomal dominant polycystic kidney disease has also been identified (Lakhia et al., 2020). *MiR-214* also promotes kidney fibrosis in experimental animals (Denby et al., 2014), which may be linked to its ability to promote epithelial-to-mesenchymal transition (EMT) in tubular epithelial cells (Liu et al., 2018c). *MiR-199a* expression is downregulated in human renal cell carcinoma (He et al., 2015; Liu et al., 2018b) and deregulated in rodent genetic models of polycystic kidney disease (Dweep et al., 2013), in lupus nephritis (Ye et al., 2018), and in ischemia/reperfusion injury (Godwin et al., 2010).

While the role and mechanisms of action of *miR-199a/214* in the kidney have begun to be elucidated, functional studies that focus on human kidney development have yet to be undertaken. We hypothesized that the *miR-199a/214* cluster regulates human kidney development and elected to use human embryonic stem cell (hESC)-based models (Bantounas et al., 2018; Takasato et al., 2014, 2016) to investigate its function. Following confirmation of *miR-199a/214* expression in histological sections of human embryonic kidneys and in hESC-derived kidney tissues, we differentiated hESCs in 2D and 3D in the presence or absence of competitive inhibitors of the miRNAs (miRNA “sponges”), which bind to and mask miRNAs thus preventing the latter from accessing their targets (Ebert et al., 2007;

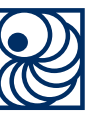

Week 12

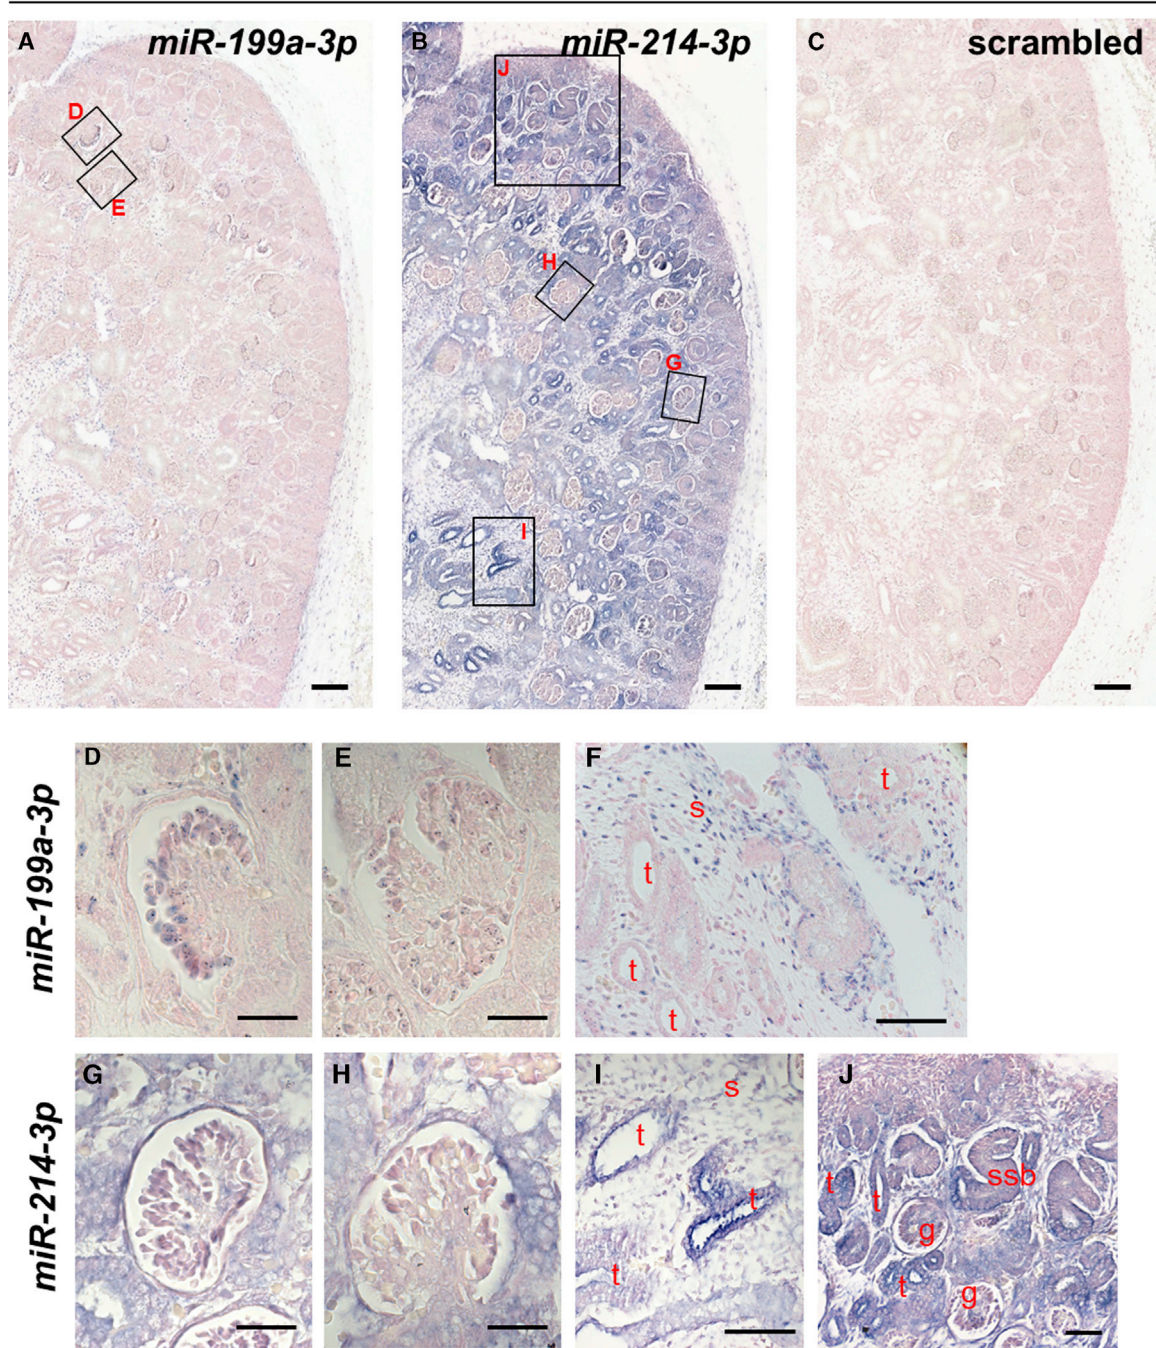

**Figure 1. *In Situ* Hybridization for the *miR-199a/214* Cluster in Human Embryonic Kidney at Week 12 of Gestation**

(A–C) Low-magnification images showing part of the cortical region of week 12 human embryonic kidney sections probed with a *miR-199a-3p*, *miR-214-3p*, or scrambled control probe. Squares show the positions of the high-magnification images in (D, E, and G–J).

(D–F) *MiR-199a-3p* was present in outer cortical, maturing (D), but not in more mature, deeper layer (E) glomeruli, and was also present in interstitial cells (F).

(G–I) *MiR-214-3p* was also present in early maturing (G) but not more mature (H) glomeruli and was additionally expressed in interstitial cells and some tubules (I).

(legend continued on next page)

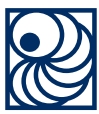

Ebert and Sharp, 2010). We found that inhibiting this miRNA cluster resulted in aberrations of the metanephric mesenchyme (MM) domain in 2D cultures. Sponges did not prevent the formation of 3D kidney-like organoids. Histological and molecular analyses of these organoids, however, revealed glomerular dysmorphology and an increase of the capillary network between tubules. Thus, the *miR-199a/214* cluster fine-tunes the differentiation of the human kidney.

## RESULTS

### Expression of the *miR-199a/214* Cluster in the Developing Human Kidney

To determine expression of the *miR-199a/214* cluster in the developing kidney, we performed *in situ* hybridization (ISH) experiments, using digoxigenin-labeled locked nucleic acid (LNA) probes, firstly on 12-week gestation human embryonic kidney sections (Figure 1). We focused on *miR-199a-3p* and *miR-214-3p* because these are the dominant mature strands stemming from their corresponding pre-miRNA hairpins in most tissues, according to the miRBase database (Kozomara and Griffiths-Jones, 2011). *MiR-214-3p* expression appeared more widespread than that of *miR-199a-3p* (Figures 1A–1C). On higher-power images, both were expressed in less mature more superficial glomerular tufts, including in presumptive podocytes (Figures 1D and 1G), but they appeared downregulated in the most mature (i.e., deepest) glomeruli (Figures 1E and 1H). In addition, both miRNAs were expressed in the interstitium between tubules (Figures 1F and 1I). *MiR-214-3p* but not *miR-199a-3p* was expressed in cortical tubules (Figures 1F and 1I) and in the nephrogenic zone, where it was prominent in S-shaped bodies, nephron precursors (Figure 1J). We also examined expression of the miRNAs in week 7 human embryonic sections (Figures 2A and 2B) and stained for WT1, CDH1, and MEIS1 to identify MM, tubules, and interstitium, respectively (Figures 2C–2E). We detected both *miR-214-3p* and *miR-199a-3p* in the interstitium within the rudimentary metanephros and around the ureter stalk at 7 weeks gestation, in a similar location to MEIS1 immunostaining.

### Expression of the *miR-199a/214* Cluster in hESC-Kidney Development

Having confirmed expression of *miR-199a* and *miR-214* *in vivo*, we wanted to investigate their potential roles in the developing kidney. To this end, we first used a previ-

ously established method of hESC differentiation to kidney in 2D culture, capable of modeling early events in kidney development (Bantounas et al., 2018; Takasato et al., 2014) (Figure 3A). In this model, stem cells are first differentiated, through intermediate mesoderm, to precursor cells forming multilayered structures emanating from the cell monolayer. Cells within these immature structures initially express both epithelial (CDH1 [E-cadherin]) and MM (WT1 [Wilms tumor 1]) markers (Figure 3B). As the cells mature, these structures are divided into mutually exclusive WT1<sup>+</sup> and CDH1<sup>+</sup> domains (Figure 3C). We traced the expression of the primary transcript (*DNM3OS*) as well as individual mature miRNAs of the cluster by qPCR in three different hESC lines: MAN13, MAN11, and HUES1 during kidney differentiation (Figures 3D, 3E and S1). In each line, we observed a similar pattern of expression, with both the primary and mature transcripts being expressed simultaneously, starting between days 7 and 10 of differentiation and increasing thereafter, reaching a plateau in HUES1 and MAN13 during the second half of the differentiation protocol. *MiR-199a-3p* and *miR-214-3p* were the dominant mature species for *miR-199a* and *miR-214*, respectively, while expression of the 5p strands was at least 10-fold lower in both cases.

### Inhibition of *miR-199a/214* Decreases the Amount of MM and Alters Epithelial Morphology in Differentiating hESC Cultures

We next wanted to know whether inhibiting either of these miRNAs would have an effect on the differentiating cultures. We constructed lentiviral vectors expressing miRNA inhibitors (sponges) against each of the four mature species of the miRNA cluster (*miR-199a-5p*, *miR-199a-3p*, *miR-214-5p*, and *miR-214-3p*), previously shown to be effective by Tsujimura et al. (2015), under the control of a U6 promoter (Figure 4A). These inhibitors act by binding to the mature miRNAs, thereby preventing the latter from accessing their intracellular targets (Ebert et al., 2007). MAN13 hESCs were transduced with the sponge-expressing lentiviral vectors (or with control lentivirus expressing only EGFP) on the day of plating and then differentiated. At the end of the 2D protocol (day 30), the cultures were immunostained for WT1, as a marker of MM in the developing multilayered kidney tissue, and also for CDH1 to assess the extent of epithelialization. Inhibiting *miR-199a-3p* significantly decreased the extent of the MM domain, as judged by the proportion of multilayered kidney tissue masses that immunostained positive for WT1 (Figures 4B–4G). Moreover, inhibition of *miR-214-3p* (but not of *miR-199a-3p*)

(J) Higher-magnification view of the nephrogenic zone showing strong *miR-214-3p* expression. Scale bars, 100  $\mu$ m (A–C); 50  $\mu$ m (D, E, G, H); 200  $\mu$ m (F, I); and 40  $\mu$ m (J). t, tubule; s, stroma; g, glomerulus; ssb, S-shaped body. Stained areas appear purple, over Nuclear Fast Red (pink) counterstain.



### Week 7

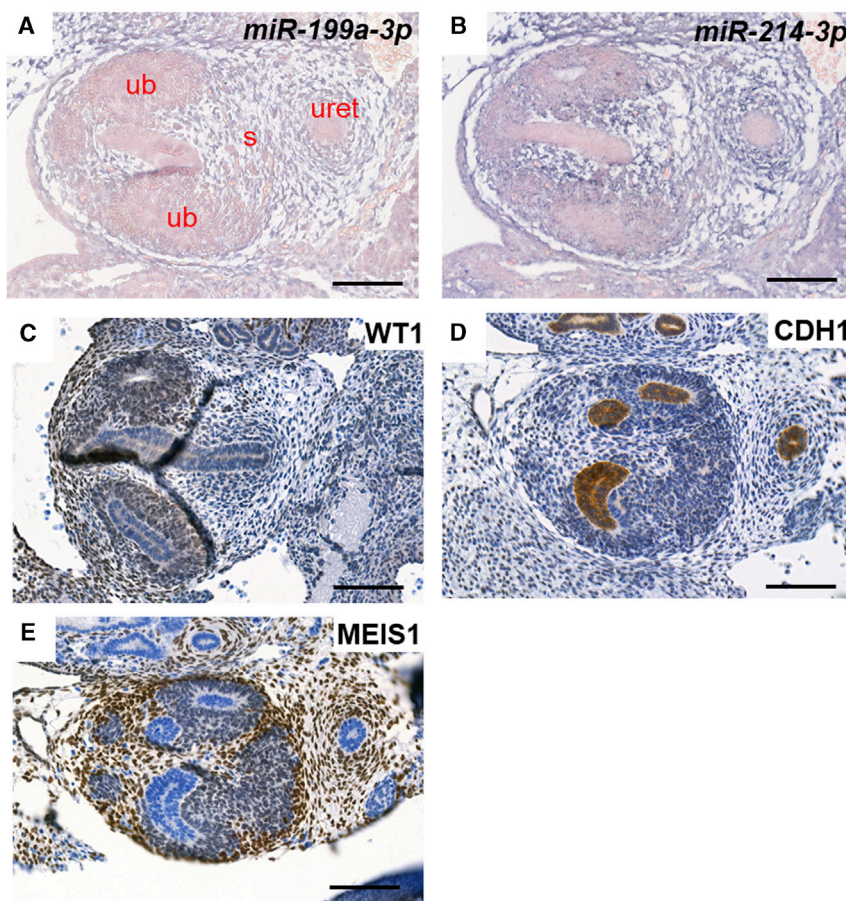

**Figure 2. Expression of Members of the *miR-199a/214* Cluster in Human Embryonic Kidney at Week 7 of Gestation**

(A and B) *In situ* hybridization with LNA probes against *miR-199a-3p* and *miR-214-3p*, revealing expression of both miRNAs mainly in the stroma. Stained areas appear purple, over Nuclear Fast Red (pink) counterstain. (C–E) Sections of week 7 human embryonic kidneys were stained for different lineage markers (WT1 for MM; CDH1 for tubules; MEIS1 for stroma). Scale bars, 100  $\mu\text{m}$ . s, stroma; ub, ureteric bud tip; uret, ureter. Stained areas are brown, over hematoxylin (blue) counterstain.

appeared to change the morphology of the epithelia making these structures more elongated compared with controls (Figures 4H–4K and S2).

Following this, we tested if overexpressing *miR-199a*, using a lentiviral vector in a different hESC line, MAN11, which normally generates a lower proportion of the WT1<sup>+</sup> (MM) domain than MAN13, had opposite effects. Indeed, overexpression of *miR-199a* increased the extent of the WT1<sup>+</sup> domain, while by the end of the differentiation protocol, it made CDH1<sup>+</sup> tubules appear less thin/elongated; the opposite of the effects elicited by the sponge (Figure S3).

#### Effects of Downregulating *miR-199a/214* in Organoids

We next investigated whether the perturbation of the WT1<sup>+</sup> domain observed in 2D culture correlated with defects in nephron maturation in more mature tissues. As the 2D differentiation method that we employed does not progress beyond the condensation of MM around branching tubules (Bantounas et al., 2018), we differentiated hESCs into 3D kidney organoids (Figures 5A–5D). We and others have previously shown that this method

predominantly yields MM-derived nephrons with immature glomeruli and proximal tubules, as well as minor populations of distal-like tubules and collecting duct-like structures (Bantounas et al., 2018; Takasato et al., 2016). To ascertain that this was a suitable model for our investigation, we first differentiated MAN13 hESCs using this method and determined the level of both the pre-miRNA (*DNM3OS*) and the mature miRNAs of the *miR-199a/214* cluster during differentiation by qPCR. Similarly to the 2D model, the expression of all molecular species increased with time and *miR-199a-3p* and *miR-214-3p* were the dominant strands (Figures 5E and 5F). We also performed LNA probe ISH with probes against *miR-199a-3p* and *miR-214-3p*, finding that interstitial cells, tubules, and glomeruli expressed these miRNAs (Figures 5G–5L).

#### Inhibition of *miR-199a-3p* or *miR-214-3p* Results in Formation of Dysplastic Nephrons and a Denser Vascular Network

After verifying expression of the miRNAs in the 3D organoid model, we proceeded to inhibit their activity in this

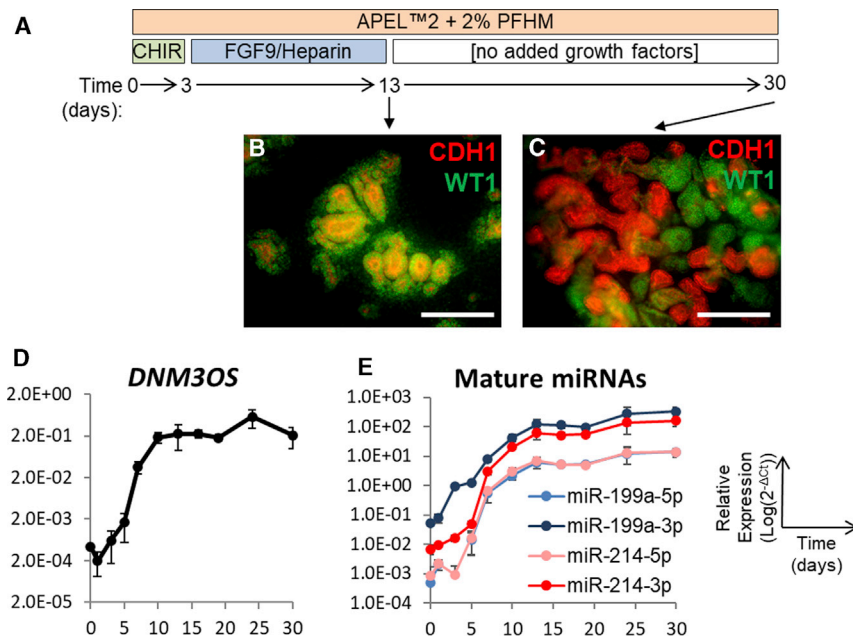

### Figure 3. Expression of the *miR-199a/214* Cluster in MAN13 hESC Cultures Differentiating to Kidney in 2D

(A) Schematic representation of the 2D differentiation protocol.

(B and C) 2D cultures immunostained for CDH1 and WT1 at day 13 (B) and day 30 (C) of the differentiation protocol, showing the eventual separation of CDH1<sup>+</sup> (epithelial cells) and WT1<sup>+</sup> (MM) to discrete areas of the developing structures. Scale bars, 120 μm.

(D and E) Time course of the primary transcript (D) and mature miRNAs (E) of the *miR-199a/214* cluster during 2D differentiation, assessed by qPCR (mean ± SEM; n = 3 independent differentiation experiments).

See also Figure S1.

system. We transduced MAN13 hESCs with lentiviruses expressing sponges against *miR-199a-3p* or *miR-214-3p*, or a control EGFP lentivirus (Figure 4A), then differentiated them as 3D organoids. We confirmed transgene expression from the vectors through to the end of the differentiation protocol (day 25), as shown by the persistence of EGFP signal (Figure S4), at which point we undertook immunohistochemical and molecular analyses. In control organoids, we detected round glomerular profiles with delicate fronds in their tufts, and these glomeruli immunostained for SYNPO (Synaptopodin), PODXL (Podocalyxin), and WT1. In contrast, subsets of glomeruli were dysmorphic in organoids in which *miR-199a-3p* or *miR-214-3p* was inhibited (Figures 6A–6I). These glomeruli appeared to have irregular, sometimes square-shaped outlines and lacked delicate fronds in their tufts, and it was difficult to discern discrete junctions between the Bowman space and the adjacent tubule. There was, however, no difference in proportions of each organoid that immunostained for the three glomerular markers, suggesting that the total mass of glomeruli was not affected. Interestingly, as measured by qPCR, transcripts for *PODXL* were significantly lower than in controls when *miR-214-3p* was inhibited, and *WT1* transcripts were significantly downregulated when either miRNA was inhibited (Figures 6M–6O). Numerous other kidney differentiation transcripts were not affected by miRNA inhibition (Figure S5), suggesting a specific effect. Moreover, our manipulations had no significant effect on the average size of the organoids, as assessed by measuring the areas of their transverse mid-sections on histology (Figure S6A).

Organoid sections were then immunostained for the proximal tubule apical protein Cubilin (CUBN) (Nielsen et al., 2016) to determine whether miRNA inhibition had any adverse effects on proximal tubules (Figures 6J–6L). The proportions of organoid cross-sections with positive CUBN staining did not differ significantly between the three groups (Figure S6B). On close inspection, however, the normal apical linear pattern of CUBN seen in control organoids (Figure 6J) was difficult to discern in sponge-treated organoids, in which the pattern appeared more diffuse, sometimes granular and cytoplasmic, pointing to a loss of its proper cellular polarity (Figures 6K and 6L). To examine more distal parts of the nephron and presumptive collecting ducts, we immunostained for CDH1, but observed no differences between control and sponge-treated organoids (Figures S6C–S6H).

We further asked if our miRNA manipulations had an effect on the development of blood vessels in the organoids. Compared with controls, PECAM1 immunostaining (marking vascular endothelial cells) revealed a significantly denser network of vessels in both anti-*miR-199a-3p*- and anti-*miR-214-3p*-treated organoids compared with controls (Figure 7). Vasculature was observed surrounding the developing Bowman capsule but in no condition did we observe glomerular tufts with capillary loops. Thus, the over-abundant capillaries remain confined to the interstitial space.

### Molecular Sponges that Target the *miR-199a/214* Cluster Result in a Tendency for Increases in Key Kidney Developmental Transcripts

Finally, to gain insight into the mechanism of action of the *miR-199a/214* cluster, we measured the levels of several

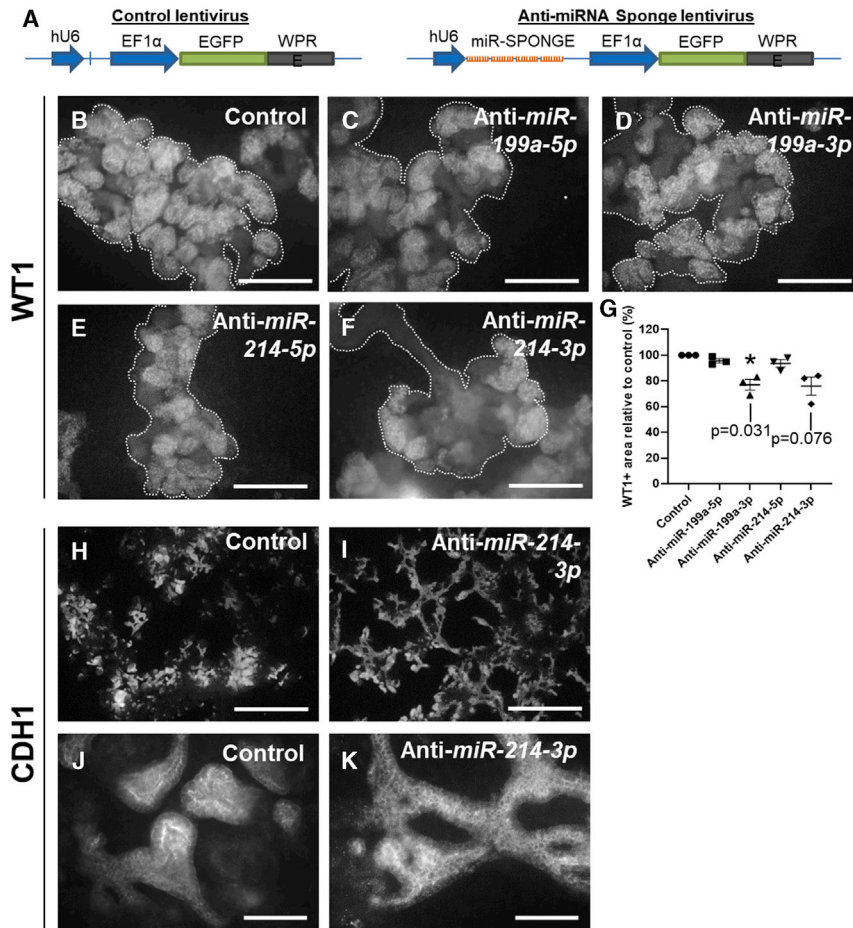

**Figure 4. Inhibition of Members of the *miR-199a/214* Cluster by miRNA Sponges in Differentiating 2D Cultures**

MAN13 hESCs transduced either with control (EGFP-only) lentiviral vectors or with vectors expressing “sponge” inhibitors against *miR-199a-5p*, *miR199a-3p*, *miR-214-5p*, or *miR-214-3p* schematically shown in (A) were differentiated in 2D and immunostained with WT1 or CDH1 antibodies at the end (day 30) of the protocol.

(B–G) Inhibition of *miR-199a-3p* caused a significant decrease in the extent of the WT1<sup>+</sup>-stained area (MM) within developing cell aggregates (examples outlined) in differentiating cultures. Quantified in (G): mean ± SEM; n = 3 independent differentiation experiments; \*p < 0.05, one-sample t test; individual p values are also shown for anti-*miR-199a-3p* and anti-*miR-214-3p*. Scale bars, 120 μm.

(H and I) Low-magnification images showing that inhibition of *miR-214-3p* results in more elongated epithelial structures (CDH1<sup>+</sup>) in the cultures. Scale bars, 600 μm.

(J and K) Examples of individual CDH1<sup>+</sup> tubules showing normal (control) versus elongated (anti-*miR-214-3p*) phenotype. Scale bars, 60 μm.

See also Figures S2 and S3.

*miR-199a/214* target transcripts that have been shown to be destabilized by these miRNAs in other (non-renal) models and which have also been shown to play roles in kidney development (reviewed in Little and McMahon, 2012; Papakrivopoulou et al., 2013). We predicted that, if the activity of the miRNAs were to be inhibited by the molecular sponges, then the levels of the target transcripts should increase. Indeed, we observed tendencies for several of these targets to increase at the later time points of our organoid differentiation protocol. *FZD4*, *VANGL2*, and *MAPK8* tended to increase when the anti-*miR-199a-3p* sponge was applied (Figure S7A), while levels of *FZD4* transcripts tended to increase in the presence of the anti-*miR-214-3p* sponge (Figure S7B). As assessed by the DIANA-miR-Path software (Vlachos et al., 2012), these three species of transcripts are not only targets of the *miR-199a/214* cluster, but they also participate in the same WNT signaling pathway that controls planar cell polarity. Indeed, an aberration in planar cell polarity may help explain the loss of uniform apical CUBN immunostaining in tubules in the organoids when either of the miRNAs was inhibited (Figures 6J–6L). Furthermore, WNT9b from the developing ureteric

bud signals to the surrounding MM, binding to FZD4 to synchronize the maturation of both tissues (Carroll et al., 2005) and this is in agreement with our observation that the balance between MM and tubules is deregulated in our sponge-treated 2D cultures (Figures 4B–4G). In addition to this, levels of *TWIST1* and *JAG1* transcripts, both previously shown to be downstream of WNT (Howe et al., 2003; Katoh and Katoh, 2006), also showed a tendency to increase at certain points of the organoid differentiation protocol after exposure to the molecular sponges.

## DISCUSSION

In this study, we showed that a particular miRNA locus, encoding the *miR-199a/214* cluster, is expressed both in human embryonic kidneys *in vivo*, and in kidney tissues differentiated from cultured hESCs. We inhibited these miRNAs using molecular sponges, and we overexpressed them in human stem cell-derived kidney tissues. Neither manipulation prevented the formation of kidney-like tissues, either in 2D or in 3D organoid cultures. Critically,

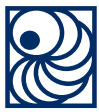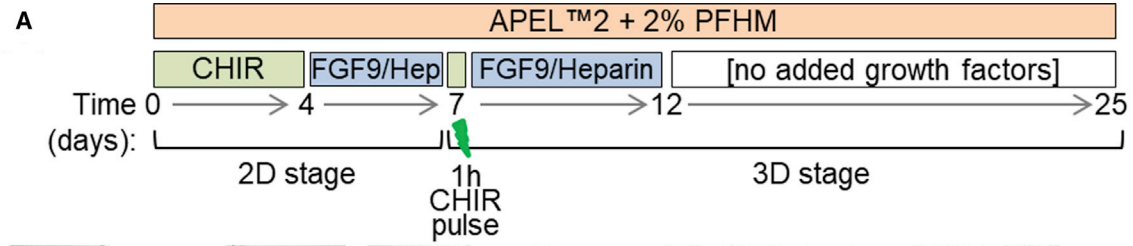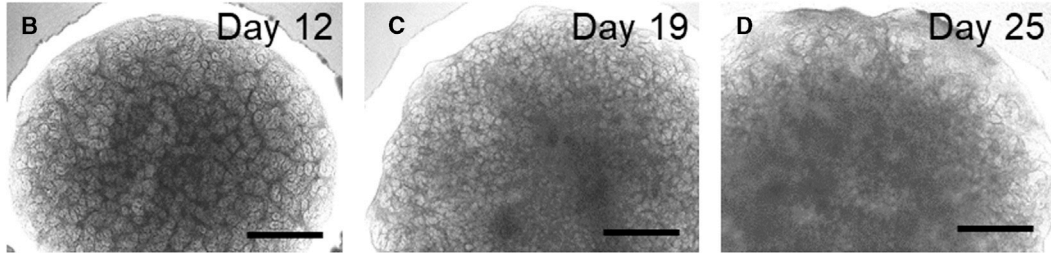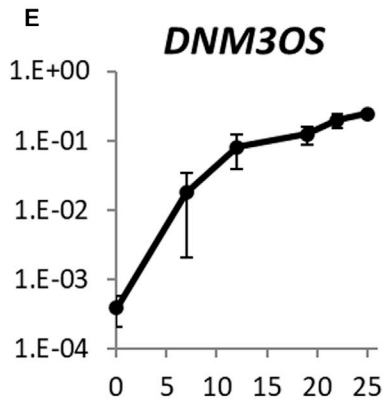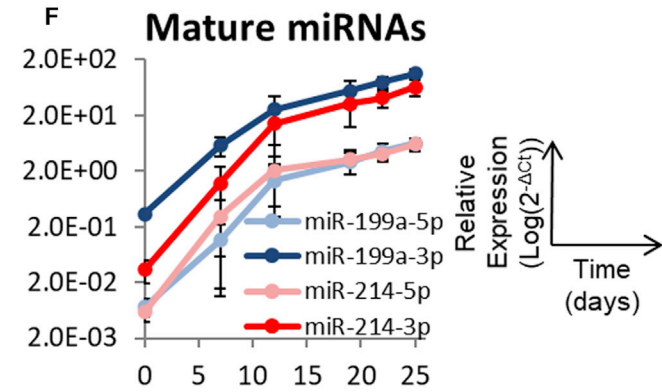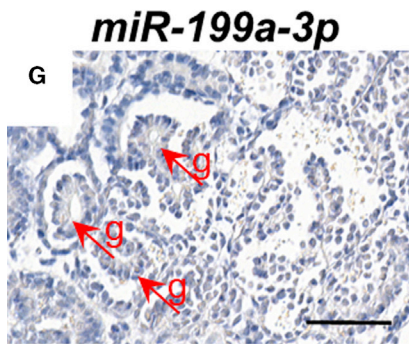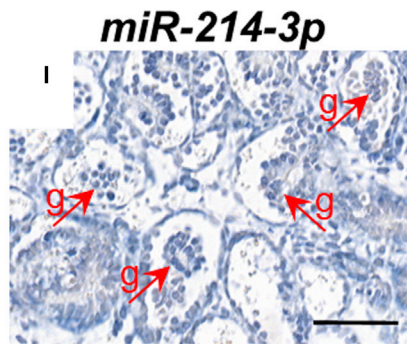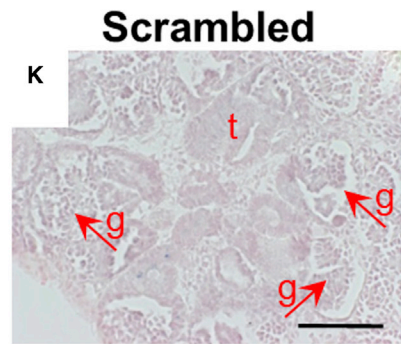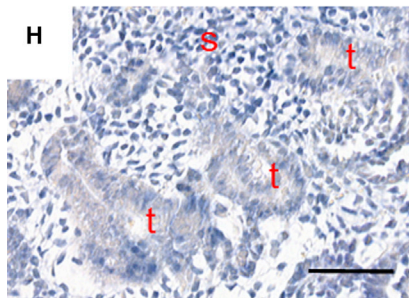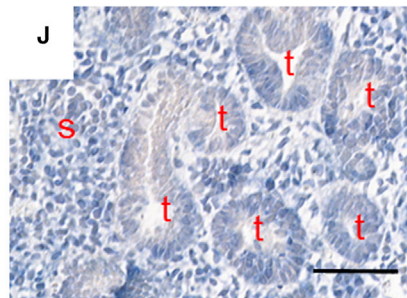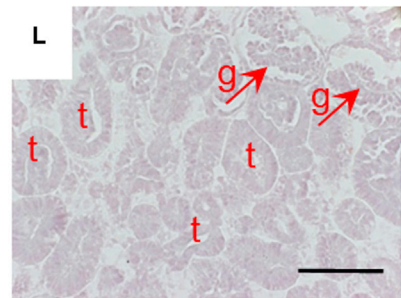

(legend on next page)



however, we report here that the *miR-199a/214* cluster has demonstrable effects in fine-tuning the development of human nephrons, and the extent of the capillary network between tubules. These effects are also consistent with the fine-tuning roles played by miRNAs in other, non-kidney, examples of mammalian development and differentiation (e.g., [Martinez and Walhout, 2009](#); [Schratt, 2009](#); [Xiao and Dudley, 2017](#)). Indeed, we noted that the expression level of the *miR-199a/214* cluster tended to increase during the stem cell-to-kidney differentiation protocol. This, again, is in accord with the idea that these molecules do not control, for example, whether a specific organ, such as a kidney, will initiate but instead will modify its tissue components as its nephron and vascular lineages continue to mature.

Using ISH of human embryonic kidneys we detected both miRNAs in the interstitium within the rudimentary metanephros and around the ureter stalk at 7 weeks gestation. At 12 weeks, both miRNAs were expressed in the interstitium, with *miR-214* also detected in the nephrogenic zone and in deeper tubules. Next, hESCs were used to investigate the role of the cluster in kidney development. *miR-199a/214* was upregulated during 2D kidney differentiation in several wild-type lines. In 3D organoids, interstitial cells, tubules, and avascular glomeruli expressed these miRNAs as assessed by ISH. It should be noted that, as previously observed ([Bantounas et al., 2018](#)), glomeruli that differentiate in organoid culture remain immature compared with *in vivo* counterparts. This may explain why we observed marked miRNA expression in glomeruli within organoids yet only transient expression of the miRNAs in glomeruli in native embryonic human kidneys, i.e., the outer layers of glomeruli, that would have recently formed from MM, were positive but the deeper, more mature, glomeruli appeared to have downregulated the miRNAs. In 2D cultures, transduction of lentiviral vectors overexpressing sponge inhibitors into hESCs decreased the MM domain, as assessed by WT1 immunostaining, and altered the morphology of adjacent tubules, as assessed by CDH1 immunostaining. To understand the repercus-

sions in more mature developing kidneys, we differentiated control or miRNA sponge-transduced hESCs into 3D organoids. Here, we documented dysmorphic glomeruli and a more prominent interstitial vascular network. Thus, the *miR-199a/214* cluster fine-tunes differentiation of both MM-derived nephrons and capillaries between tubules.

While clinical implications of these observations require further study, it is noted that a subset of people with heterozygous deletions encompassing the *DNM3OS* locus that encodes the *miR-199a/214* cluster, have malformed kidneys and renal tracts ([Chatron et al., 2015](#)). Importantly, these patients did not completely lack kidneys but instead had organs that were, for example, abnormal in shape ([Chatron et al., 2015](#)). Although there is no published information about kidney physiology or histology in these individuals, based on our *ex vivo* organoid experiments we predict that the following may be found in the patients on further investigation: a reduced glomerular filtration rate, because of dysmorphic glomeruli; and a Fanconi-like syndrome of proximal tubule dysfunction, because of the combination of disturbed polarity demonstrated by CUBN mislocalization, as well as aberrations in peritubular capillaries. In future, it would be informative to generate induced pluripotent stem cells from such individuals; we predict that the kidney organoids that would form from them would have similar phenotypic aberrations to those in the current study. To our knowledge, patients with biallelic deletions of the *DNM3OS* locus have yet to be reported, so their potential renal phenotype is unknown.

In the 2D differentiating cultures, inhibiting *miR-199a* or *miR-214* resulted in a proportionally smaller WT1<sup>+</sup> domain (representing MM) at the end of the protocol, which could be linked to nephron abnormalities that were observed in our 3D organoid experiments. A similar effect in terms of the MM domain was observed by [Takasato et al. \(2016\)](#), whereby increasing the duration of Wnt pathway activation at the beginning of hESC differentiation to kidney tissue resulted in a higher proportion of MM in the cultures, at the expense of presumptive ureteric bud-derived epithelium, whereas decreasing it had the opposite effect. Wnt

### Figure 5. Endogenous Expression of *miR199a/214* Cluster Members during Differentiation of MAN13 hESC-Derived 3D Kidney Organoids

(A) Schematic representation of the differentiation protocol. On day 7, the cells are pelleted and transferred to Transwell membranes to continue developing as 3D organoids.

(B–D) Phase contrast images showing the development of the organoids during the 3D part of the differentiation protocol; clear morphogenesis is visible in the periphery of the organoids. Scale bars, 600  $\mu$ m.

(E and F) Time course of the primary transcript (D) and mature miRNAs (E) of the *miR-199a/214* cluster during 3D organoid differentiation, assessed by qPCR (mean  $\pm$  SEM; n = 3 independent differentiation experiments, with three organoids pooled per time point in each experiment).

(G–L) *In situ* hybridization with LNA probes against *miR-199a-3p* and *miR-214-3p* on day 30 organoids shows strong interstitial and glomerular expression as well as some often patchy expression in the tubules. Scale bars, 50  $\mu$ m. t, tubules; g, glomeruli (shown by arrows). Stained areas appear purple, over Nuclear fast red (pink) counterstain.



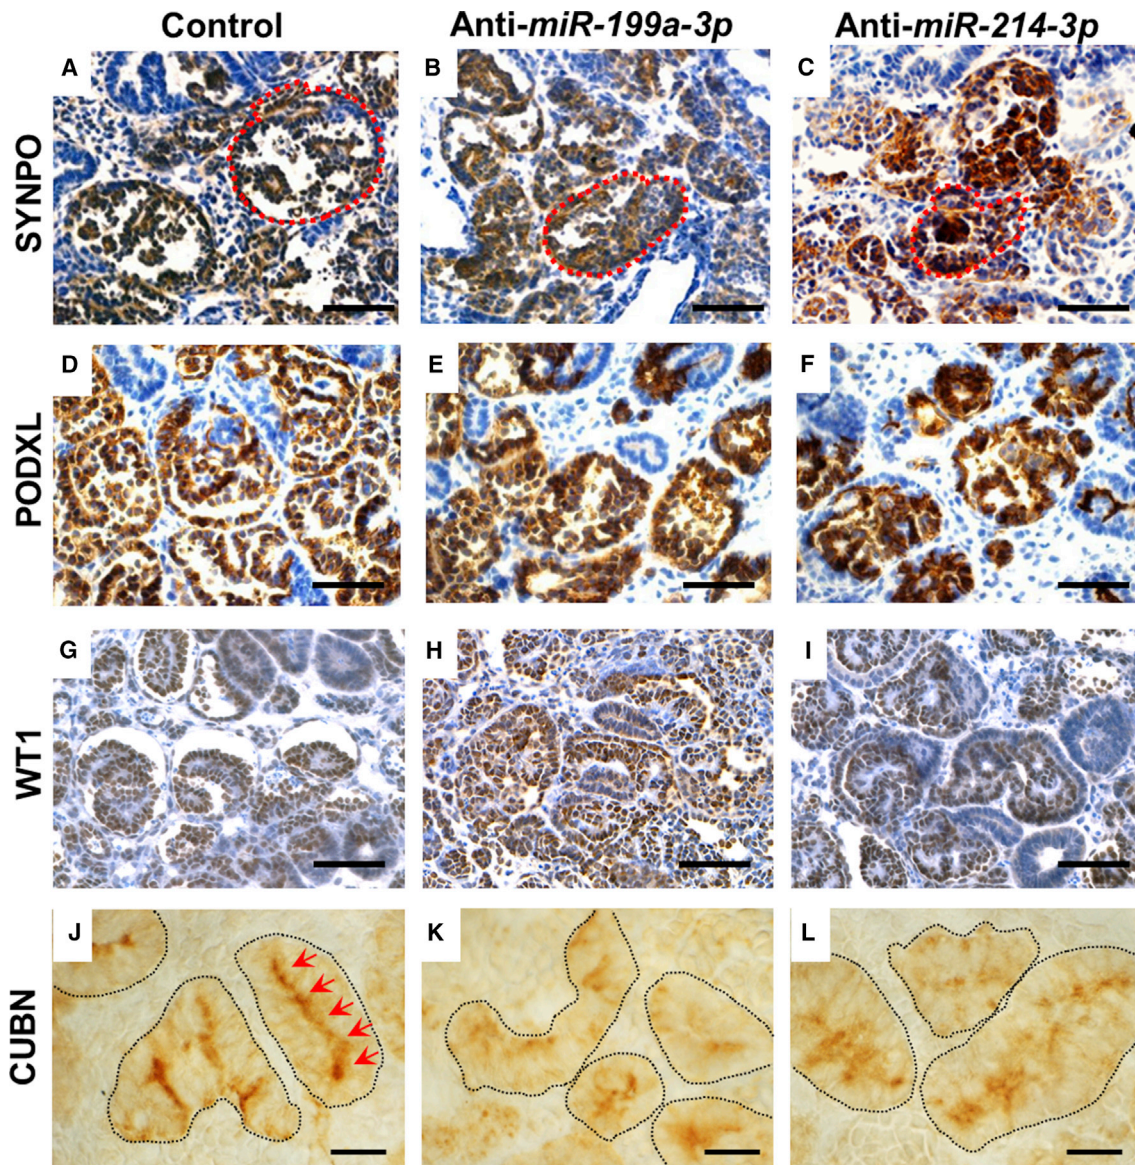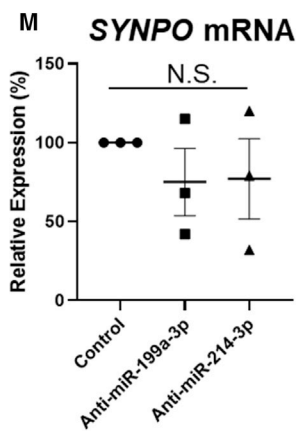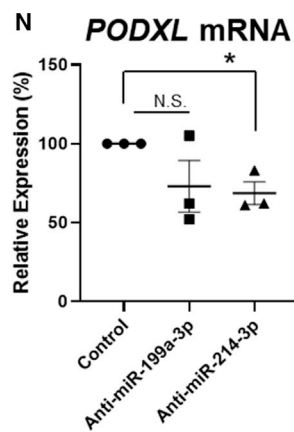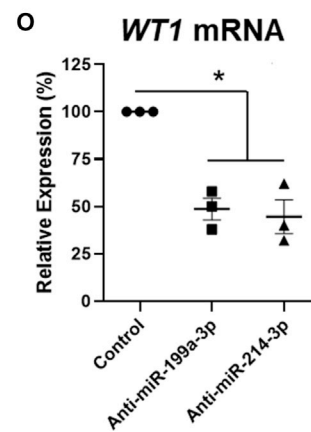

(legend on next page)



signaling is central to nephron development (Carroll et al., 2005; Kobayashi et al., 2008; Park et al., 2007); so, mechanistically, the two observations could be linked, given that the *miR-199a/214* cluster has been shown to control members of the Wnt pathway (including  $\beta$ -catenin, GSK3 $\beta$ , and Frizzled-4 [Alexander et al., 2013; Ghatak and Raha, 2015; Wang et al., 2012; Xia et al., 2012]) in a variety of tissues. Notably, although in 2D there was a reduction of the WT1<sup>+</sup> cell population when the miRNAs were inhibited, we did not observe the same in our 3D organoids, where the overall area stained with an anti-WT1 antibody was the same across all conditions. It must be noted, however, that our 3D organoids reach a later stage in kidney development, when the majority of WT1<sup>+</sup> cells are confined to glomeruli and, thus, WT1 staining represents immature podocytes rather than MM. Nonetheless, in miRNA sponge-treated organoids, we observed a trend for increased levels of target transcripts of genes involved in WNT signaling, implying the deregulation of the pathway and potentially linking our 2D with our 3D organoid results, as well as mechanistically explaining our observed phenotype. In future studies, detailed proteomic analyses of control versus sponge-treated organoids should be informative to both confirm the effects on these target molecules and to identify further targets. The latter is especially important given that levels of many target transcripts do not decrease upon miRNA binding, but instead the levels of encoded proteins are reduced due to miRNA-induced block in translation.

In addition, despite the extent of PODXL and WT1 immunostaining being unchanged compared with controls, transcripts encoding these proteins were actually lower in the sponge-treated organoids. Since immunohistochemistry is not quantitative, the amount of WT1 protein in tissues may therefore actually be less, contributing to the abnormal glomerulogenesis observed: indeed, it is known that WT1 drives expression of *PODXL* (Palmer et al., 2001), which may in turn lead to the glomerular abnormalities observed in our organoids.

Another abnormality that was observed in organoids treated with the miRNA sponges was in proximal tubules

that, like glomeruli, are derived from WT1<sup>+</sup> MM. In the sponge-treated organoids, proximal tubules lacked the normal apical linear pattern of CUBN, perhaps suggesting aberrant polarity. This phenotype is in keeping with the expression of the miRNAs we observed in control organoid tubules, as well as *miR-214-3p* expression in human embryonic kidney tubules *in vivo*. Moreover, we observed tendencies for increased transcript levels of *FZD4*, *VANGL2*, and *MAPK8*, mRNAs encoding planar cell polarity molecules implicated in kidney tubule morphogenesis and differentiation (Papakrivopoulou et al., 2013). An aberration of CUBN would be predicted to compromise the processing of glomerular ultrafiltrate (Nielsen et al., 2016) and we note that an important role for miRNAs in regulating ion transport in the kidney has already been suggested (Elvira-Matelot et al., 2011; Liu et al., 2017).

Epithelial structures were clearly affected in 2D cultures transduced with the anti-*miR-214* sponge vector: CDH1<sup>+</sup> epithelia became more elongated and connected up to form a network. These branched CDH1<sup>+</sup> tubules in 2D cultures are more likely to represent ureteric bud derivatives and inhibiting *miR-214-3p* could, thus, favor ureteric bud epithelium stabilization, while restricting MM (as shown by the reduction in WT1<sup>+</sup> cells). In agreement with this interpretation, CDH1 itself has been previously reported as a direct target of *miR-214* (Wang et al., 2016), while in some cancers *miR-214* was found to promote EMT (Liu et al., 2018a; Long et al., 2015; Zhao et al., 2018) and therefore inhibiting it would be expected to result in epithelial stabilization.

We have also shown that inhibition of *miR-199a/214* resulted in an increased vascular network in kidney organoids. This is in agreement with previous studies in non-kidney tissues indicating that *miR-199a* and *miR-214* are mainly antiangiogenic. For instance, *miR-214* is expressed in vascular smooth muscle cells, where it targets proangiogenic *QKI* (van Mil et al., 2012) and it is upregulated in heart failure patients (Duan et al., 2015), in both cases preventing vascular sprouting. The cluster also targets

### Figure 6. Characterization of Glomerular and Proximal Tubule Morphology following Inhibition of *miR-199a/214* Activity

(A–I) MAN13-derived organoids treated with anti-miRNA sponges and control organoids were fixed at the end of differentiation (day 25) and immunostained using antibodies against glomerular markers: (A–C) SYNPO, with a typical glomerulus circled in each condition. Note the circular profiles in controls with fine fronds in the glomerular tufts, whereas the glomeruli are dysmorphic in the sponge-treated organoids; (D–F) PODXL; (G–I) WT1. Scale bars, 100  $\mu$ m. Immunostaining is brown over hematoxylin (blue) counterstain.

(J–L) Organoids immunostained for CUBN (brown; no counterstain), marking proximal tubules (individual tubules outlined) revealed a continuous linear apical pattern in control tubules (J) (marked by arrows), which is disorganized in the anti-miRNA sponge organoids (K, L). Scale bars, 20  $\mu$ m.

(M–O) Quantification of transcripts encoding *SYNPO*, *PODXL*, and *WT1* by qPCR at day 25 of differentiation (mean  $\pm$  SEM; n = 3 independent differentiation experiments; each dot represents a pooled RNA sample from three organoids; N.S., not significant; \*p < 0.05, one-sample t test).

See also Figures S4–S7.

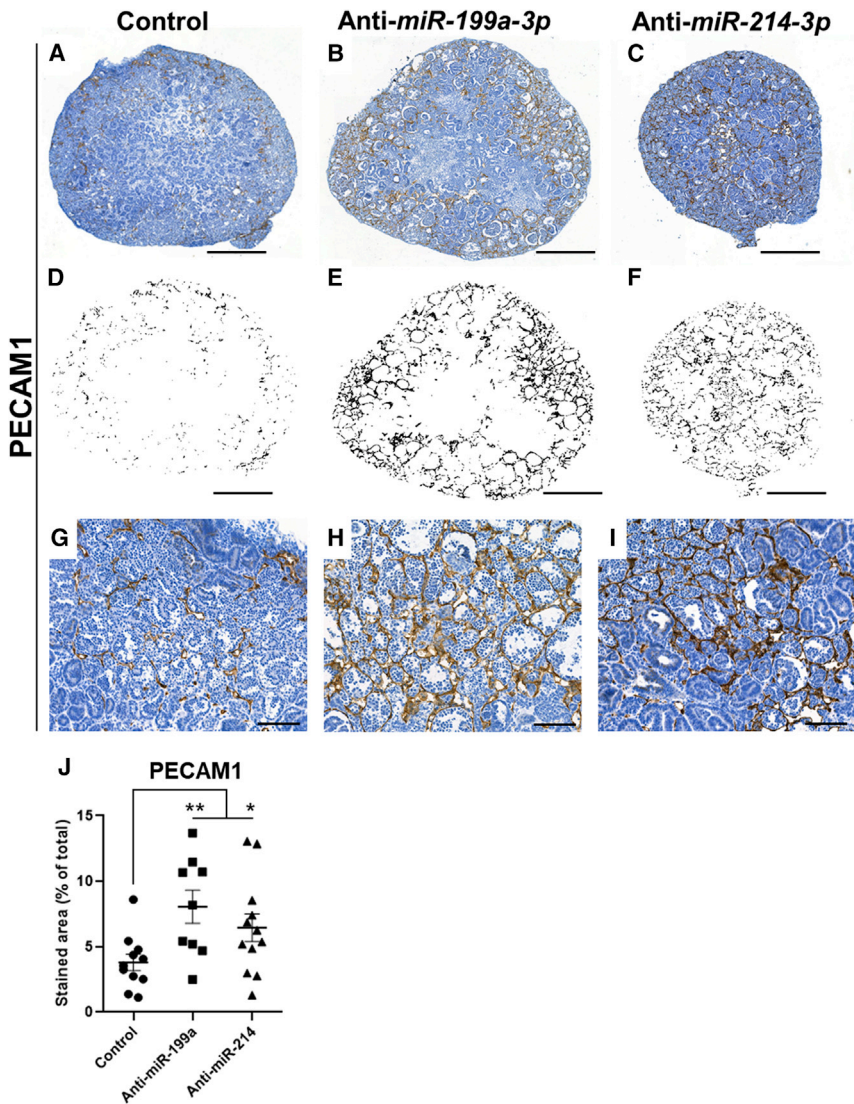

**Figure 7. Inhibition of *miR-199a* or *miR-214* Increases Vascular Density in Kidney Organoids**

(A–C) MAN13-derived organoid sections were immunostained for PECAM1 (marking vascular endothelial cells). Scale bars, 500  $\mu\text{m}$ .

(D–F) PECAM1<sup>+</sup> areas of the organoids in (A–C) are highlighted in each case showing the increased extent of staining in the anti-miRNA organoids.

(G–I) High-power images showing the denser network of blood vessels in the anti-miRNA organoids compared with controls. Scale bars, 100  $\mu\text{m}$ . Immunostaining is brown over hematoxylin (blue) counterstain.

(J) Quantification of the extent PECAM1 staining in organoids (mean  $\pm$  SEM; each dot represents a separate organoid; organoids from three independent experiments were used \* $p < 0.05$ , \*\* $p < 0.01$  ANOVA, followed by *post-hoc* t tests).

See also Figures S4–S7.

vascular endothelial growth factor (VEGF) and its receptors in endometrial cell hypoxia, coronary heart disease, and cancer (Dai et al., 2015; Ghosh et al., 2017; Jin et al., 2015). In fact, inhibition of these miRNA is emerging as a mechanism that allows tumor angiogenesis and survival (He et al., 2013; Lombardo et al., 2018; Orso et al., 2020; Wang et al., 2012). In the light of these findings, it is, therefore, not surprising that we observed a similar “contra-vascular” function for the cluster in the kidney. Our data reinforce the idea that considering regulation of the vascularization as predominantly reliant on growth factor (e.g., VEGFA)-receptor interactions is a considerable simplification. This is supported by the recent data from Wang et al. (2020) showing that, although *miR-218-2* homozygous knockout mice were not viable, in the heterozygote knockout the density of

capillaries was found to be reduced around kidney tubules postnatally.

Finally, given the very strong stromal expression of the miRNA cluster in both human tissue sections and organoids, it may appear surprising that abnormalities following miRNA inhibition were mainly in nephrons. However, it must be stressed that the different cell populations in the developing kidney depend on each other to co-develop and differentiate and that miRNA may play a role in this communication. Furthermore, a significant change occurred in the vasculature throughout the interstitium. In keeping with the results of our study, when *Dicer1* (the main nuclease effecting miRNA maturation) was knocked out in the kidney stroma (Foxd1<sup>+</sup> cells of mice), severe glomerular, tubular, and angiogenic abnormalities were observed (Nakagawa et al., 2015).



In summary, our data strongly suggest the importance of the *miR-199a/214* cluster in fine-tuning human kidney development, as assessed by a human stem cell model. Further work is necessary to both define the precise molecular mechanisms of the observed aberrations of glomerular, tubule, and capillary differentiation, and to determine the potential physiological effects of these phenotypes.

## EXPERIMENTAL PROCEDURES

### Human Tissues

Human tissues, collected after maternal consent and ethical approval (REC 08/H0906/21+5), were provided by the Medical Research Council and Wellcome Trust Human Developmental Biology Resource (<http://www.hdbr.org/>). Kidneys were fixed, processed, and sections prepared as described previously (Lopes et al., 2019).

### hESC Culture and Renal Differentiation

ESCs were grown on 24-well or 6-well plates coated with  $5 \mu\text{g mL}^{-1}$  recombinant human Vitronectin (Life Technologies, no. A14700) in the case of MAN11 and MAN13 (Ye et al., 2017) or with Matrigel (BD Biosciences, no. 734-1440) in the case of HUES1, in mTeSR1 (STEMCELL Technologies, no. 5850) or TeSR2 medium (STEMCELL Technologies, no. 5860), with the medium changed once daily. The cells were passaged by treatment of the cultures with 0.5 mM EDTA solution (pH 8) (Invitrogen, no. 15575-038; diluted in PBS) and replating the cells in mTeSR1 or TeSR2 medium, containing 5 nM ROCK inhibitor, Y-27632 (Tocris, no. 1254) for 24 h.

For differentiation, stem cells were plated on Vitronectin-coated plates, at a density of  $18,000 \text{ cells cm}^{-2}$  when untransduced, or at  $20,500 \text{ cells cm}^{-2}$  when transduced with lentivirus (to account for additional cell death due to some viral toxicity) in mTeSR1 or TeSR2 medium containing 10 nM Y-27632. The following day the medium was replaced with STEMdiff APEL (STEMCELL Technologies, no. 05210), containing 8  $\mu\text{M}$  CHIR-99021 (Tocris, no. 4423) for 3 days, followed by APEL supplemented with 200 ng  $\text{mL}^{-1}$  FGF9 (PeproTech, no. 100-23) and 1  $\mu\text{g mL}^{-1}$  heparin (Sigma, no. 3149) for a further 10 days. Subsequently, the cells were cultured in basal APEL medium, which was changed daily.

3D hESC-kidney organoid culture was performed according to Takasato et al. (2016) and Bantounas et al. (2018). In brief, hESCs were seeded as above and, beginning the following day (day 0), they were incubated in STEMdiff APEL 2 medium (STEMCELL Technologies, no. 05270) with 2% PFHM-II (protein-free hybridoma medium II) (Thermo Fisher Scientific, no. 12040077), supplemented with 8  $\mu\text{M}$  CHIR-99021 for a period of 4 days, before switching to APEL 2/2% PFMH with FGF9/heparin, as above. At day 7, the cells were collected by treatment with TrypLE (Life Technologies, no. 12605-028) and divided into 200,000 cell aliquots. The aliquots were then centrifuged at  $400 \times g$  in a microcentrifuge and the resulting cell pellets were placed on Millicell Cell Culture inserts (pore size, 0.4  $\mu\text{m}$ ; diameter, 30 mm; no. PICM03050), which were placed into 6-well plates with 1.2 mL of APEL 2/2% PFMH/5  $\mu\text{M}$  CHIR-99021 medium per well. After 1 h, the medium was changed back to APEL 2/PFMH/FGF9/heparin until day 12 and

then to APEL 2/PFMH for the remainder of the protocol (day 25). At the 3D stage, the medium was changed once every 2 days.

### RNA Extraction and qPCR

RNA was extracted using the mirVana miRNA isolation kit (Thermo Fisher Scientific, AM1560) according to the manufacturer's instructions. Mature miRNA PCR was conducted using the appropriate TaqMan miRNA Assays (Thermo Fisher Scientific) and longer transcripts were detected using the TaqMan RNA-to-Ct 1-Step Kit (Thermo Fisher Scientific, no. 4392653). For a more detailed description and primer sequences, see Supplemental Experimental Procedures and Table S2.

### ISH of miRNA in Kidney Tissue and 3D Organoid Sections

Digoxigenin-labeled miRCURY LNA probes were used to detect mature miRNAs on paraffin-embedded sections of kidney organoids. See Supplemental Experimental Procedures for details.

### Immunostaining of 2D Cultures and Immunohistochemistry on 3D Organoid Sections

See Supplemental Experimental Procedures. Primary antibodies used are listed in Table S1.

### Construction of miRNA Sponge-Expressing Lentiviral Shuttle Plasmids, Lentiviral Vector Production, and Transduction of Stem Cells

Previously published miRNA sponge-expressing plasmids: pLLX (empty vector), pLLX-sponge-*miR-199a-5p*, pLLX-sponge-*miR-199a-3p*, pLLX-sponge-*miR-214-5p*, and pLLX-sponge-*miR-214-3p* were a gift from Professor Nakashima's group (Kyushu University, Japan) (Tsujiura et al., 2015). Each of these five plasmids was digested with *Apal/XhoI* to excise the pU6 sponge expression cassette, which was then cloned into *Apal/XhoI*-digested pLL3.7 vector (Addgene, no. 11795). Lentiviral vectors were then produced as described previously in Bantounas et al. (2018) (see Supplemental Experimental Procedures). hESCs were transduced with lentivirus at a multiplicity of infection of 5 IU/cell.

## SUPPLEMENTAL INFORMATION

Supplemental Information can be found online at <https://doi.org/10.1016/j.stemcr.2020.11.007>.

## AUTHOR CONTRIBUTIONS

I.B., A.S.W., and S.J.K. designed the study. I.B., F.M.L., and K.M.R. conducted the research. I.B., F.M.L., A.S.W., and S.J.K. analyzed the data. I.B., A.S.W., and S.J.K. wrote the paper. All authors approved the final paper.

## ACKNOWLEDGMENTS

We are most grateful to the following funding bodies: UK Research and Innovation/Medical Research Council (MRC) UK Regenerative Medicine Platform hub grant MR/K026739/1; Kidney Research UK John Feehally-Stoneygate Project and Innovation award JFS/RP/008/20160916; Kidneys for Life pump priming grant; Horizon



2020 Marie Skłodowska-Curie Actions Initial Training Network RE-NALTRACT (642937) grant, EPSRC/MRC Center for Doctoral Training grant EP/L014904/1. The authors declare no conflict of interest. We thank Paul A. Humphreys for assistance with the graphical abstract art.

Received: May 20, 2020

Revised: November 9, 2020

Accepted: November 10, 2020

Published: December 10, 2020

## REFERENCES

- Alexander, M.S., Kawahara, G., Motohashi, N., Casar, J.C., Eisenberg, I., Myers, J.A., Gasperini, M.J., Estrella, E.A., Kho, A.T., Mitsuhashi, S., et al. (2013). MicroRNA-199a is induced in dystrophic muscle and affects WNT signaling, cell proliferation, and myogenic differentiation. *Cell Death Differ.* *20*, 1194–1208.
- Aurora, A.B., Mahmoud, A.I., Luo, X., Johnson, B.A., van Rooij, E., Matsuzaki, S., Humphries, K.M., Hill, J.A., Bassel-Duby, R., Sadek, H.A., et al. (2012). MicroRNA-214 protects the mouse heart from ischemic injury by controlling Ca<sup>2+</sup>(+) overload and cell death. *J. Clin. Invest.* *122*, 1222–1232.
- Bantounas, I., Ranjzad, P., Tengku, F., Silajdzic, E., Forster, D., Asselin, M.C., Lewis, P., Lennon, R., Plagge, A., Wang, Q., et al. (2018). Generation of functioning nephrons by implanting human pluripotent stem cell-derived kidney progenitors. *Stem Cell Reports* *10*, 766–779.
- Bartel, D.P. (2009). MicroRNAs: target recognition and regulatory functions. *Cell* *136*, 215–233.
- Carroll, T.J., Park, J.S., Hayashi, S., Majumdar, A., and McMahon, A.P. (2005). Wnt9b plays a central role in the regulation of mesenchymal to epithelial transitions underlying organogenesis of the mammalian urogenital system. *Dev. Cell* *9*, 283–292.
- Chatron, N., Haddad, V., Andrieux, J., Desir, J., Boute, O., Dieux, A., Baumann, C., Drunat, S., Gerard, M., Bonnet, C., et al. (2015). Refinement of genotype-phenotype correlation in 18 patients carrying a 1q24q25 deletion. *Am. J. Med. Genet. A* *167A*, 1008–1017.
- Chen, H., Shalom-Feuerstein, R., Riley, J., Zhang, S.D., Tucci, P., Agostini, M., Aberdam, D., Knight, R.A., Genchi, G., Nicotera, P., et al. (2010). miR-7 and miR-214 are specifically expressed during neuroblastoma differentiation, cortical development and embryonic stem cells differentiation, and control neurite outgrowth in vitro. *Biochem. Biophys. Res. Commun.* *394*, 921–927.
- Dai, L., Lou, W., Zhu, J., Zhou, X., and Di, W. (2015). MiR-199a inhibits the angiogenic potential of endometrial stromal cells under hypoxia by targeting HIF-1 $\alpha$ /VEGF pathway. *Int. J. Clin. Exp. Pathol.* *8*, 4735–4744.
- Denby, L., Ramdas, V., Lu, R., Conway, B.R., Grant, J.S., Dickinson, B., Aurora, A.B., McClure, J.D., Kipgen, D., Delles, C., et al. (2014). MicroRNA-214 antagonism protects against renal fibrosis. *J. Am. Soc. Nephrol.* *25*, 65–80.
- Duan, Q., Yang, L., Gong, W., Chaugai, S., Wang, F., Chen, C., Wang, P., Zou, M.H., and Wang, D.W. (2015). MicroRNA-214 is up-regulated in heart failure patients and suppresses XBP1-mediated endothelial cells angiogenesis. *J. Cell Physiol.* *230*, 1964–1973.
- Dweep, H., Sticht, C., Kharkar, A., Pandey, P., and Gretz, N. (2013). Parallel analysis of mRNA and microRNA microarray profiles to explore functional regulatory patterns in polycystic kidney disease: using PKD/Mhm rat model. *PLoS One* *8*, e53780.
- Ebert, M.S., Neilson, J.R., and Sharp, P.A. (2007). MicroRNA sponges: competitive inhibitors of small RNAs in mammalian cells. *Nat. Methods* *4*, 721–726.
- Ebert, M.S., and Sharp, P.A. (2010). MicroRNA sponges: progress and possibilities. *RNA* *16*, 2043–2050.
- Elvira-Matlot, E., Jeunemaitre, X., and Hadchouel, J. (2011). Regulation of ion transport by microRNAs. *Curr. Opin. Nephrol. Hypertens.* *20*, 541–546.
- Filipowicz, W., Bhattacharyya, S.N., and Sonenberg, N. (2008). Mechanisms of post-transcriptional regulation by microRNAs: are the answers in sight? *Nat. Rev. Genet.* *9*, 102–114.
- Flynt, A.S., Li, N., Thatcher, E.J., Solnica-Krezel, L., and Patton, J.G. (2007). Zebrafish miR-214 modulates Hedgehog signaling to specify muscle cell fate. *Nat. Genet.* *39*, 259–263.
- Ghatak, S., and Raha, S. (2015). Micro RNA-214 contributes to proteasome independent downregulation of beta catenin in Huntington's disease knock-in striatal cell model STHdhQ111/Q111. *Biochem. Biophys. Res. Commun.* *459*, 509–514.
- Ghosh, A., Dasgupta, D., Ghosh, A., Roychoudhury, S., Kumar, D., Gorain, M., Butti, R., Datta, S., Agarwal, S., Gupta, S., et al. (2017). MiRNA199a-3p suppresses tumor growth, migration, invasion and angiogenesis in hepatocellular carcinoma by targeting VEGFA, VEGFR1, VEGFR2, HGF and MMP2. *Cell Death Dis.* *8*, e2706.
- Godwin, J.G., Ge, X., Stephan, K., Jurisch, A., Tullius, S.G., and Iacomini, J. (2010). Identification of a microRNA signature of renal ischemia reperfusion injury. *Proc. Natl. Acad. Sci. U S A* *107*, 14339–14344.
- Gu, S., and Chan, W.Y. (2012). Flexible and versatile as a chameleon-sophisticated functions of microRNA-199a. *Int. J. Mol. Sci.* *13*, 8449–8466.
- He, H., Wang, L., Zhou, W., Zhang, Z., Wang, L., Xu, S., Wang, D., Dong, J., Tang, C., Tang, H., et al. (2015). MicroRNA expression profiling in clear cell renal cell carcinoma: identification and functional validation of key miRNAs. *PLoS One* *10*, e0125672.
- He, J., Jing, Y., Li, W., Qian, X., Xu, Q., Li, F.S., Liu, L.Z., Jiang, B.H., and Jiang, Y. (2013). Roles and mechanism of miR-199a and miR-125b in tumor angiogenesis. *PLoS One* *8*, e56647.
- Hemker, S.L., Cerqueira, D.M., Bodnar, A.J., Cargill, K.R., Clugston, A., Anslow, M.J., Sims-Lucas, S., Kostka, D., and Ho, J. (2020). Deletion of hypoxia-responsive microRNA-210 results in a sex-specific decrease in nephron number. *FASEB J.* *34*, 5782–5799.
- Howe, L.R., Watanabe, O., Leonard, J., and Brown, A.M. (2003). Twist is up-regulated in response to Wnt1 and inhibits mouse mammary cell differentiation. *Cancer Res.* *63*, 1906–1913.
- Jin, Y., Yang, C.J., Xu, X., Cao, J.N., Feng, Q.T., and Yang, J. (2015). MiR-214 regulates the pathogenesis of patients with coronary artery disease by targeting VEGF. *Mol. Cell Biochem.* *402*, 111–122.
- Joglekar, M.V., Parekh, V.S., and Hardikar, A.A. (2007). New pancreas from old: microregulators of pancreas regeneration. *Trends Endocrinol. Metab.* *18*, 393–400.



- Jones, T.F., Bekele, S., O'Dwyer, M.J., and Prowle, J.R. (2018). MicroRNAs in acute kidney injury. *Nephron* *140*, 124–128.
- Katoh, M., and Katoh, M. (2006). Notch ligand, JAG1, is evolutionarily conserved target of canonical WNT signaling pathway in progenitor cells. *Int. J. Mol. Med.* *17*, 681–685.
- Kobayashi, A., Valerius, M.T., Mugford, J.W., Carroll, T.J., Self, M., Oliver, G., and McMahon, A.P. (2008). Six2 defines and regulates a multipotent self-renewing nephron progenitor population throughout mammalian kidney development. *Cell Stem Cell* *3*, 169–181.
- Kozomara, A., and Griffiths-Jones, S. (2011). miRBase: integrating microRNA annotation and deep-sequencing data. *Nucleic Acids Res.* *39*, D152–D157.
- Lakhia, R., Yheskel, M., Flaten, A., Ramalingam, H., Aboudehen, K., Ferre, S., Biggers, L., Mishra, A., Chaney, C., Wallace, D.P., et al. (2020). Interstitial microRNA miR-214 attenuates inflammation and polycystic kidney disease progression. *JCI Insight* *5*, 133785.
- Lee, Y.B., Bantounas, I., Lee, D.Y., Phylactou, L., Caldwell, M.A., and Uney, J.B. (2009). Twist-1 regulates the miR-199a/214 cluster during development. *Nucleic Acids Res.* *37*, 123–128.
- Little, M.H., and McMahon, A.P. (2012). Mammalian kidney development: principles, progress, and projections. *Cold Spring Harb. Perspect. Biol.* *4*, a008300.
- Liu, X., Edinger, R.S., Klemens, C.A., Phua, Y.L., Bodnar, A.J., LaFramboise, W.A., Ho, J., and Butterworth, M.B. (2017). A microRNA cluster miR-23-24-27 is upregulated by aldosterone in the distal kidney nephron where it alters sodium transport. *J. Cell Physiol.* *232*, 1306–1317.
- Liu, C., Luo, J., Zhao, Y.T., Wang, Z.Y., Zhou, J., Huang, S., Huang, J.N., Long, H.X., and Zhu, B. (2018a). TWIST1 upregulates miR-214 to promote epithelial-to-mesenchymal transition and metastasis in lung adenocarcinoma. *Int. J. Mol. Med.* *42*, 461–470.
- Liu, J., Liu, B., Guo, Y., Chen, Z., Sun, W., Gao, W., Wu, H., and Wang, Y. (2018b). MiR-199a-3p acts as a tumor suppressor in clear cell renal cell carcinoma. *Pathol. Res. Pract.* *214*, 806–813.
- Liu, M., Liu, L., Bai, M., Zhang, L., Ma, F., Yang, X., and Sun, S. (2018c). Hypoxia-induced activation of Twist/miR-214/E-cadherin axis promotes renal tubular epithelial cell mesenchymal transition and renal fibrosis. *Biochem. Biophys. Res. Commun.* *495*, 2324–2330.
- Lombardo, G., Gili, M., Grange, C., Cavallari, C., Dentelli, P., Togliatto, G., Taverna, D., Camussi, G., and Brizzi, M.F. (2018). IL-3R-alpha blockade inhibits tumor endothelial cell-derived extracellular vesicle (EV)-mediated vessel formation by targeting the beta-catenin pathway. *Oncogene* *37*, 1175–1191.
- Long, H., Wang, Z., Chen, J., Xiang, T., Li, Q., Diao, X., and Zhu, B. (2015). microRNA-214 promotes epithelial-mesenchymal transition and metastasis in lung adenocarcinoma by targeting the suppressor-of-fused protein (Sufu). *Oncotarget* *6*, 38705–38718.
- Lopes, F.M., Roberts, N.A., Zeef, L.A., Gardiner, N.J., and Woolf, A.S. (2019). Overactivity or blockade of transforming growth factor-beta each generate a specific ureter malformation. *J. Pathol.* *249*, 472–484.
- Marrone, A.K., Stolz, D.B., Bastacky, S.I., Kostka, D., Bodnar, A.J., and Ho, J. (2014). MicroRNA-17-92 is required for nephrogenesis and renal function. *J. Am. Soc. Nephrol.* *25*, 1440–1452.
- Martinez, N.J., and Walhout, A.J.M. (2009). The interplay between transcription factors and microRNAs in genome-scale regulatory networks. *Bioessays* *31*, 435–445.
- Nakagawa, N., Xin, C., Roach, A.M., Naiman, N., Shankland, S.J., Ligresti, G., Ren, S., Szak, S., Gomez, I.G., and Duffield, J.S. (2015). Dicer1 activity in the stromal compartment regulates nephron differentiation and vascular patterning during mammalian kidney organogenesis. *Kidney Int.* *87*, 1125–1140.
- Nielsen, R., Christensen, E.I., and Birn, H. (2016). Megalin and cubilin in proximal tubule protein reabsorption: from experimental models to human disease. *Kidney Int.* *89*, 58–67.
- Orso, F., Quirico, L., Dettori, D., Coppo, R., Virga, F., Ferreira, L.C., Paoletti, C., Baruffaldi, D., Penna, E., and Taverna, D. (2020). Role of miRNAs in tumor and endothelial cell interactions during tumor progression. *Semin. Cancer Biol.* *60*, 214–224.
- Palmer, R.E., Kotsianti, A., Cadman, B., Boyd, T., Gerald, W., and Haber, D.A. (2001). WT1 regulates the expression of the major glomerular podocyte membrane protein Podocalyxin. *Curr. Biol.* *11*, 1805–1809.
- Papakrivopoulou, E., Dean, C.H., Copp, A.J., and Long, D.A. (2013). Planar cell polarity and the kidney. *Nephrol. Dial. Transpl.* *29*, 1320–1326.
- Park, J.S., Valerius, M.T., and McMahon, A.P. (2007). Wnt/beta-catenin signaling regulates nephron induction during mouse kidney development. *Development* *134*, 2533–2539.
- Phua, Y.L., Chen, K.H., Hemker, S.L., Marrone, A.K., Bodnar, A.J., Liu, X., Clugston, A., Kostka, D., Butterworth, M.B., and Ho, J. (2019). Loss of miR-17-92 results in dysregulation of Cfr in nephron progenitors. *Am. J. Physiol. Ren. Physiol.* *316*, F993–F1005.
- Sankrityayan, H., Kulkarni, Y.A., and Gaikwad, A.B. (2019). Diabetic nephropathy: the regulatory interplay between epigenetics and microRNAs. *Pharmacol. Res.* *141*, 574–585.
- Schratt, G. (2009). Fine-tuning neural gene expression with microRNAs. *Curr. Opin. Neurobiol.* *19*, 213–219.
- Shaffi, S.K., Galas, D., Etheridge, A., and Argyropoulos, C. (2018). Role of microRNAs in renal parenchymal diseases—a new dimension. *Int. J. Mol. Sci.* *19*, 1797.
- Shi, K., Lu, J., Zhao, Y., Wang, L., Li, J., Qi, B., Li, H., and Ma, C. (2013). MicroRNA-214 suppresses osteogenic differentiation of C2C12 myoblast cells by targeting Osterix. *Bone* *55*, 487–494.
- Sun, Y., Kuek, V., Liu, Y., Tickner, J., Yuan, Y., Chen, L., Zeng, Z., Shao, M., He, W., and Xu, J. (2018). MiR-214 is an important regulator of the musculoskeletal metabolism and disease. *J. Cell Physiol.* *234*, 231–245.
- Takasato, M., Er, P.X., Becroft, M., Vanslambrouck, J.M., Stanley, E.G., Elefanty, A.G., and Little, M.H. (2014). Directing human embryonic stem cell differentiation towards a renal lineage generates a self-organizing kidney. *Nat. Cell Biol.* *16*, 118–126.
- Takasato, M., Er, P.X., Chiu, H.S., Maier, B., Baillie, G.J., Ferguson, C., Parton, R.G., Wolvetang, E.J., Roost, M.S., Lopes, S.M., et al.



- (2016). Kidney organoids from human iPS cells contain multiple lineages and model human nephrogenesis. *Nature* 536, 238.
- Trionfini, P., Benigni, A., and Remuzzi, G. (2015). MicroRNAs in kidney physiology and disease. *Nat. Rev. Nephrol.* 11, 23–33.
- Tsujimura, K., Irie, K., Nakashima, H., Egashira, Y., Fukao, Y., Fujiwara, M., Itoh, M., Uesaka, M., Imamura, T., Nakahata, Y., et al. (2015). miR-199a links MeCP2 with mTOR signaling and its dysregulation leads to Rett syndrome phenotypes. *Cell Rep.* 12, 1887–1901.
- van Mil, A., Grundmann, S., Goumans, M.J., Lei, Z., Oerlemans, M.I., Jaksani, S., Doevendans, P.A., and Sluijter, J.P. (2012). MicroRNA-214 inhibits angiogenesis by targeting Quaking and reducing angiogenic growth factor release. *Cardiovasc. Res.* 93, 655–665.
- Vlachos, I.S., Kostoulas, N., Vergoulis, T., Georgakilas, G., Reczko, M., Maragkakis, M., Paraskevopoulou, M.D., Prionidis, K., Dalamagas, T., and Hatzigeorgiou, A.G. (2012). DIANA miRPath v.2.0: investigating the combinatorial effect of microRNAs in pathways. *Nucleic Acids Res.* 40, W498–W504.
- Wang, X., Chen, J., Li, F., Lin, Y., Zhang, X., Lv, Z., and Jiang, J. (2012). MiR-214 inhibits cell growth in hepatocellular carcinoma through suppression of beta-catenin. *Biochem. Biophys. Res. Commun.* 428, 525–531.
- Wang, X., Liu, J., Yin, W., Abdi, F., Pang, P.D., Fucci, Q.A., Abbott, M., Chang, S.L., Steele, G., Patel, A., et al. (2020). miR-218 expressed in endothelial progenitor cells contributes to the development and repair of the kidney microvasculature. *Am. J. Pathol.* 190, 642–659.
- Wang, X., Shen, E., Wang, Y., Li, J., Cheng, D., Chen, Y., Gui, D., and Wang, N. (2016). Cross talk between miR-214 and PTEN attenuates glomerular hypertrophy under diabetic conditions. *Sci. Rep.* 6, 31506.
- Watanabe, T., Sato, T., Amano, T., Kawamura, Y., Kawamura, N., Kawaguchi, H., Yamashita, N., Kurihara, H., and Nakaoka, T. (2008). Dnm3os, a non-coding RNA, is required for normal growth and skeletal development in mice. *Dev. Dyn.* 237, 3738–3748.
- Xia, H., Ooi, L.L., and Hui, K.M. (2012). MiR-214 targets beta-catenin pathway to suppress invasion, stem-like traits and recurrence of human hepatocellular carcinoma. *PLoS One* 7, e44206.
- Xiao, L., and Dudley, A.C. (2017). Fine-tuning vascular fate during endothelial-mesenchymal transition. *J. Pathol.* 241, 25–35.
- Ye, H., Su, B., Ni, H., Li, L., Chen, X., You, X., and Zhang, H. (2018). microRNA-199a may be involved in the pathogenesis of lupus nephritis via modulating the activation of NF-kappaB by targeting Klotho. *Mol. Immunol.* 103, 235–242.
- Ye, J., Bates, N., Soteriou, D., Grady, L., Edmond, C., Ross, A., Kerby, A., Lewis, P.A., Adeniyi, T., Wright, R., et al. (2017). High quality clinical grade human embryonic stem cell lines derived from fresh discarded embryos. *Stem Cell Res. Ther.* 8, 128.
- Zhao, H., Diao, C., Wang, X., Xie, Y., Liu, Y., Gao, X., Han, J., and Li, S. (2018). LncRNA BDNF-AS inhibits proliferation, migration, invasion and EMT in oesophageal cancer cells by targeting miR-214. *J. Cell. Mol. Med.* 22, 3729–3739.
- Zhao, H., Ma, S.X., Shang, Y.Q., Zhang, H.Q., and Su, W. (2019). MicroRNAs in chronic kidney disease. *Clin. Chim. Acta* 491, 59–65.

**Stem Cell Reports, Volume 16**

**Supplemental Information**

**The *miR-199a/214* Cluster Controls Nephrogenesis and Vascularization  
in a Human Embryonic Stem Cell Model**

**Ioannis Bantounas, Filipa M. Lopes, Kirsty M. Rooney, Adrian S. Woolf, and Susan J. Kimber**



**Figure S1**

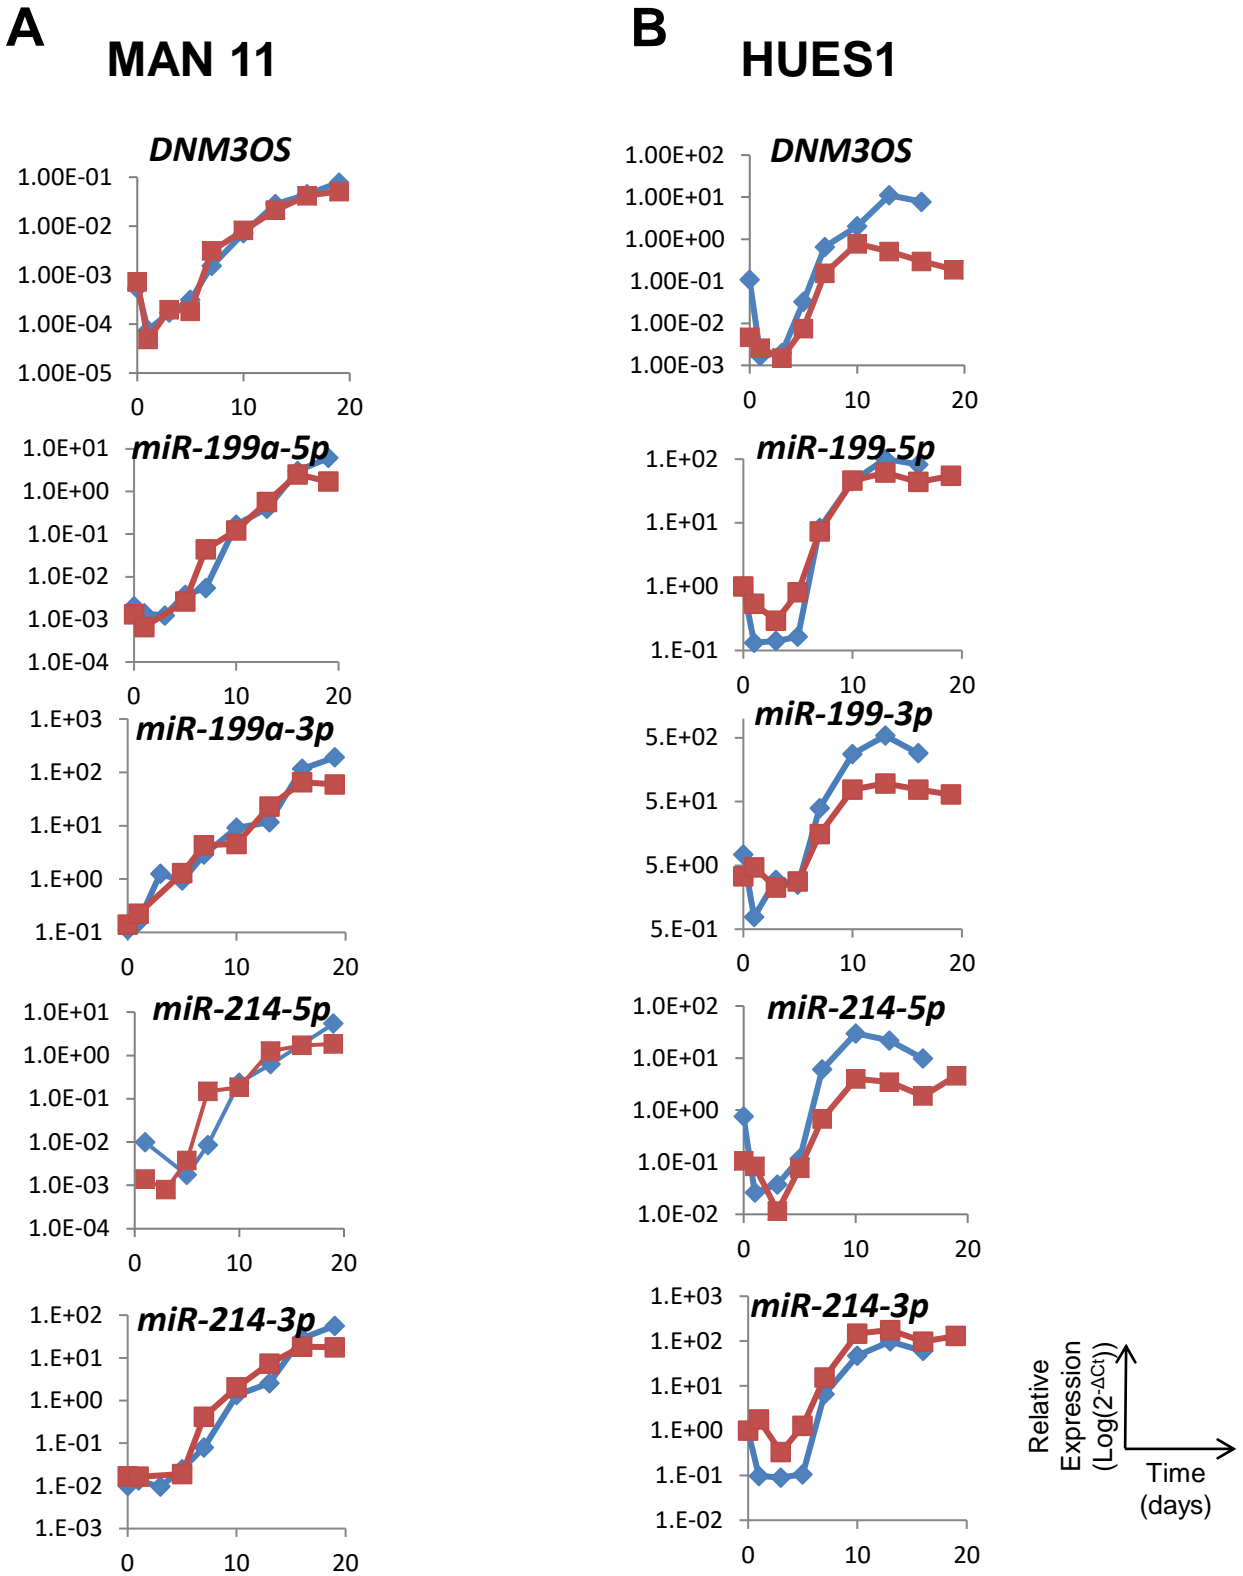

**Figure S1.** qPCR analysis of *miR-199a/214* cluster expression during 2D kidney differentiation

## Figure S2

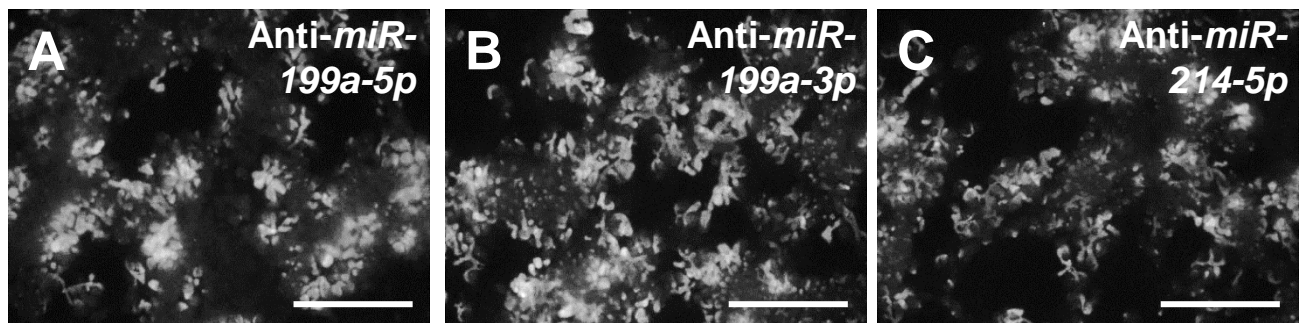

**Figure S2.** Inhibition of *miR-199a-5p*, *miR-199a-3p* or *miR-214-5p* by miRNA sponges in MAN13 differentiating 2D cultures

# Figure S3

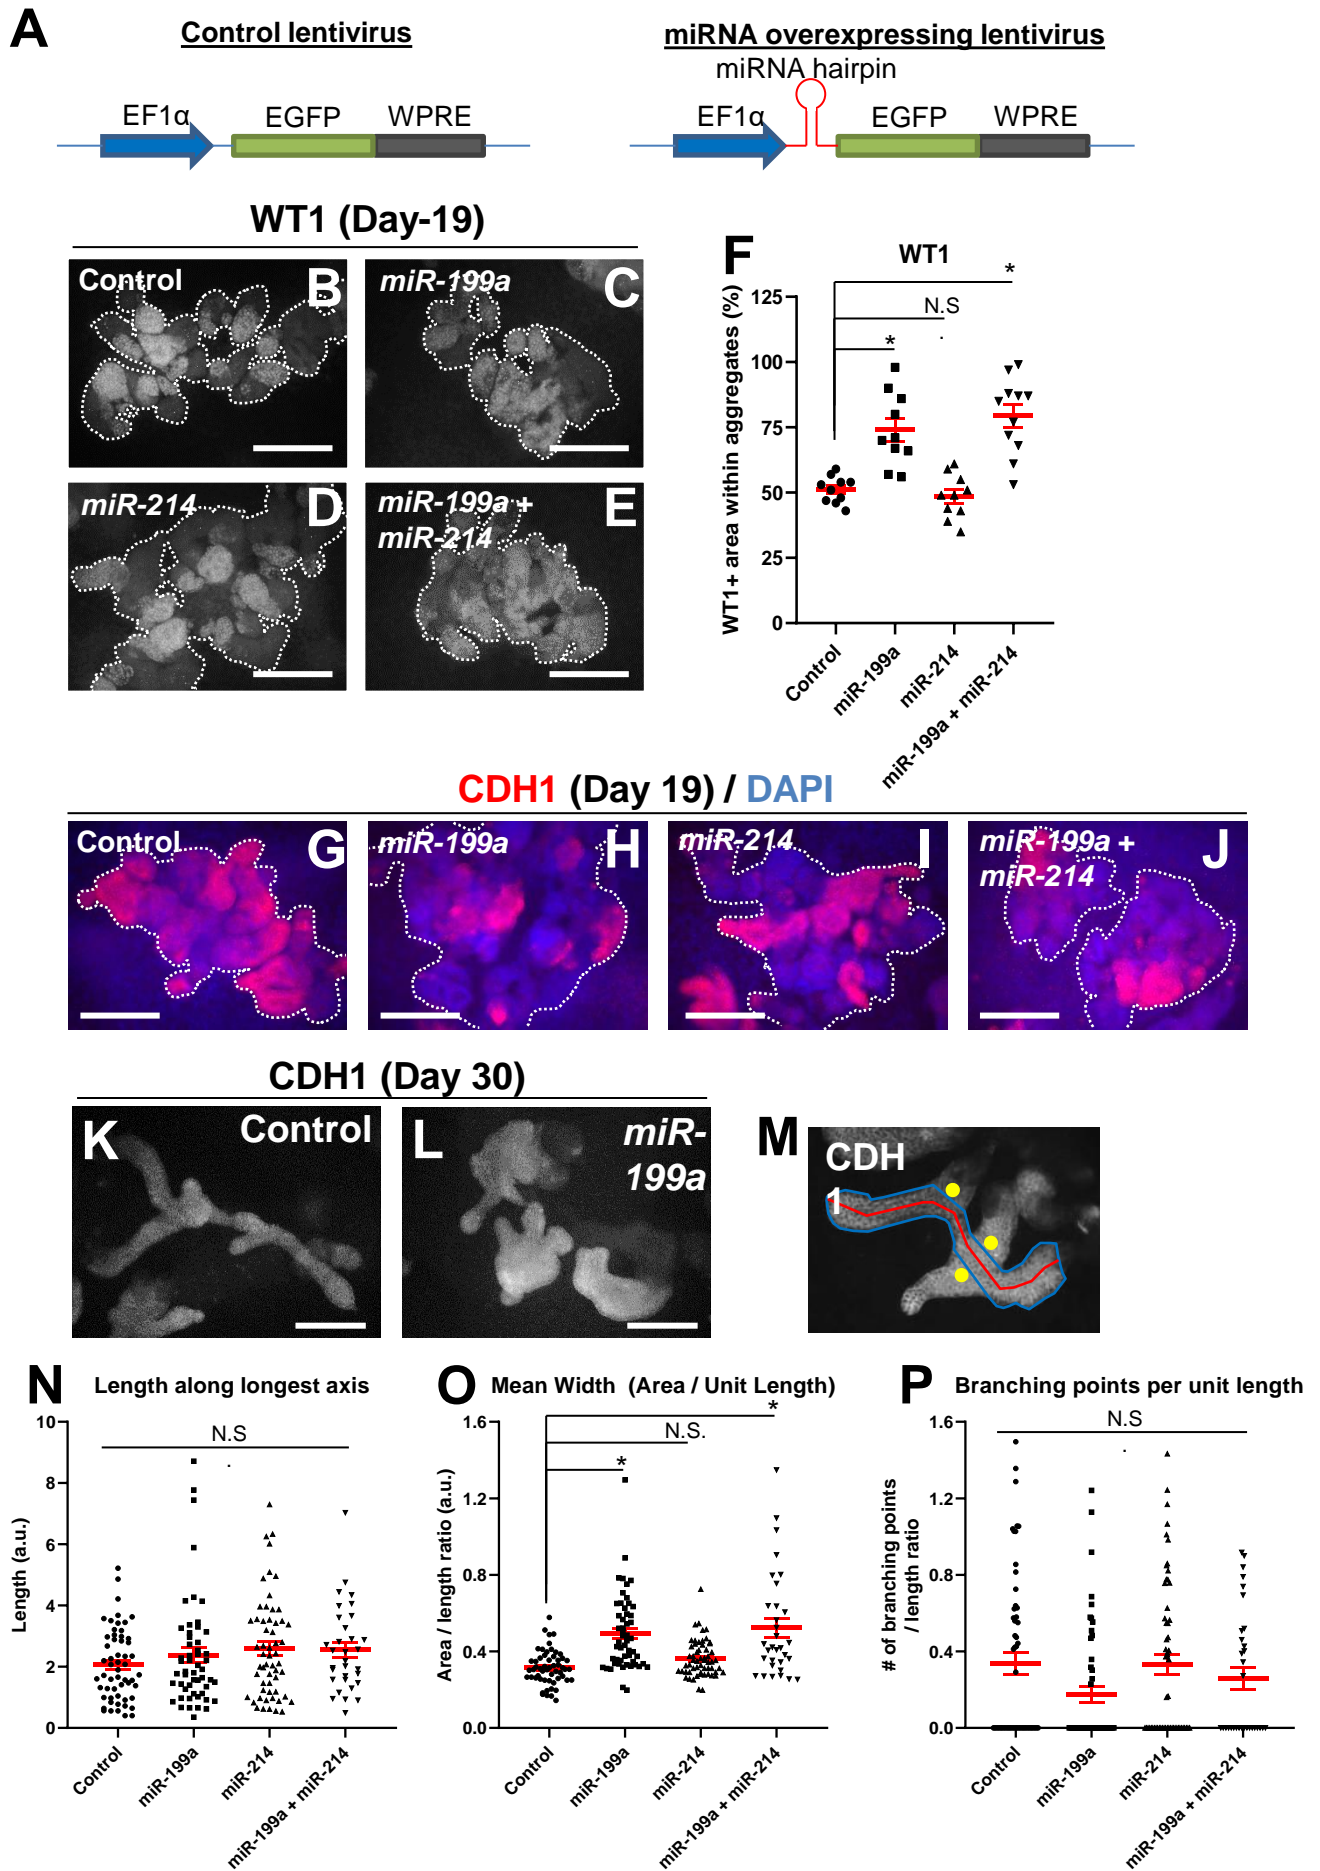

## Figure S4

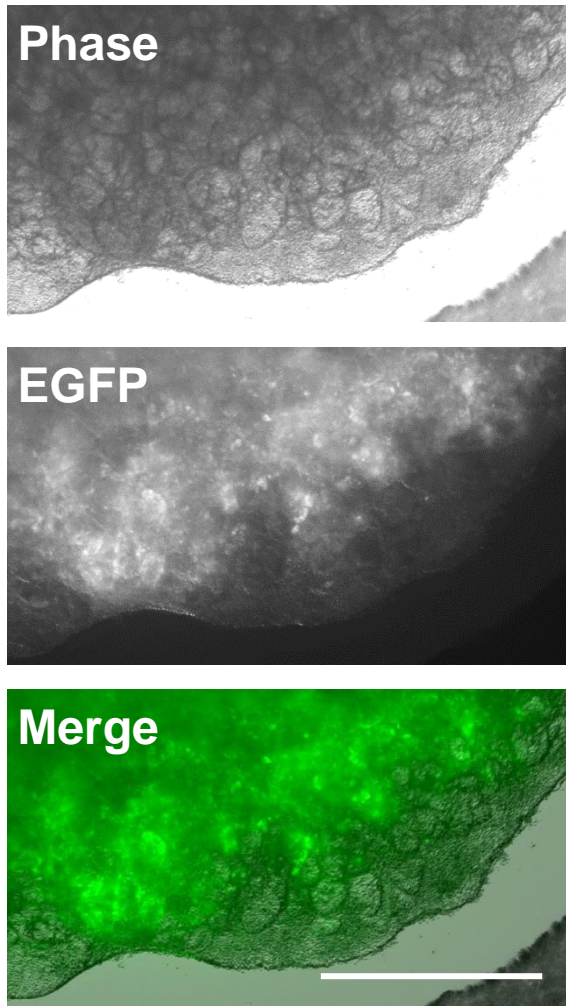

**Figure S4.** Lentiviral-mediated expression in 3D organoids.

**Figure S5**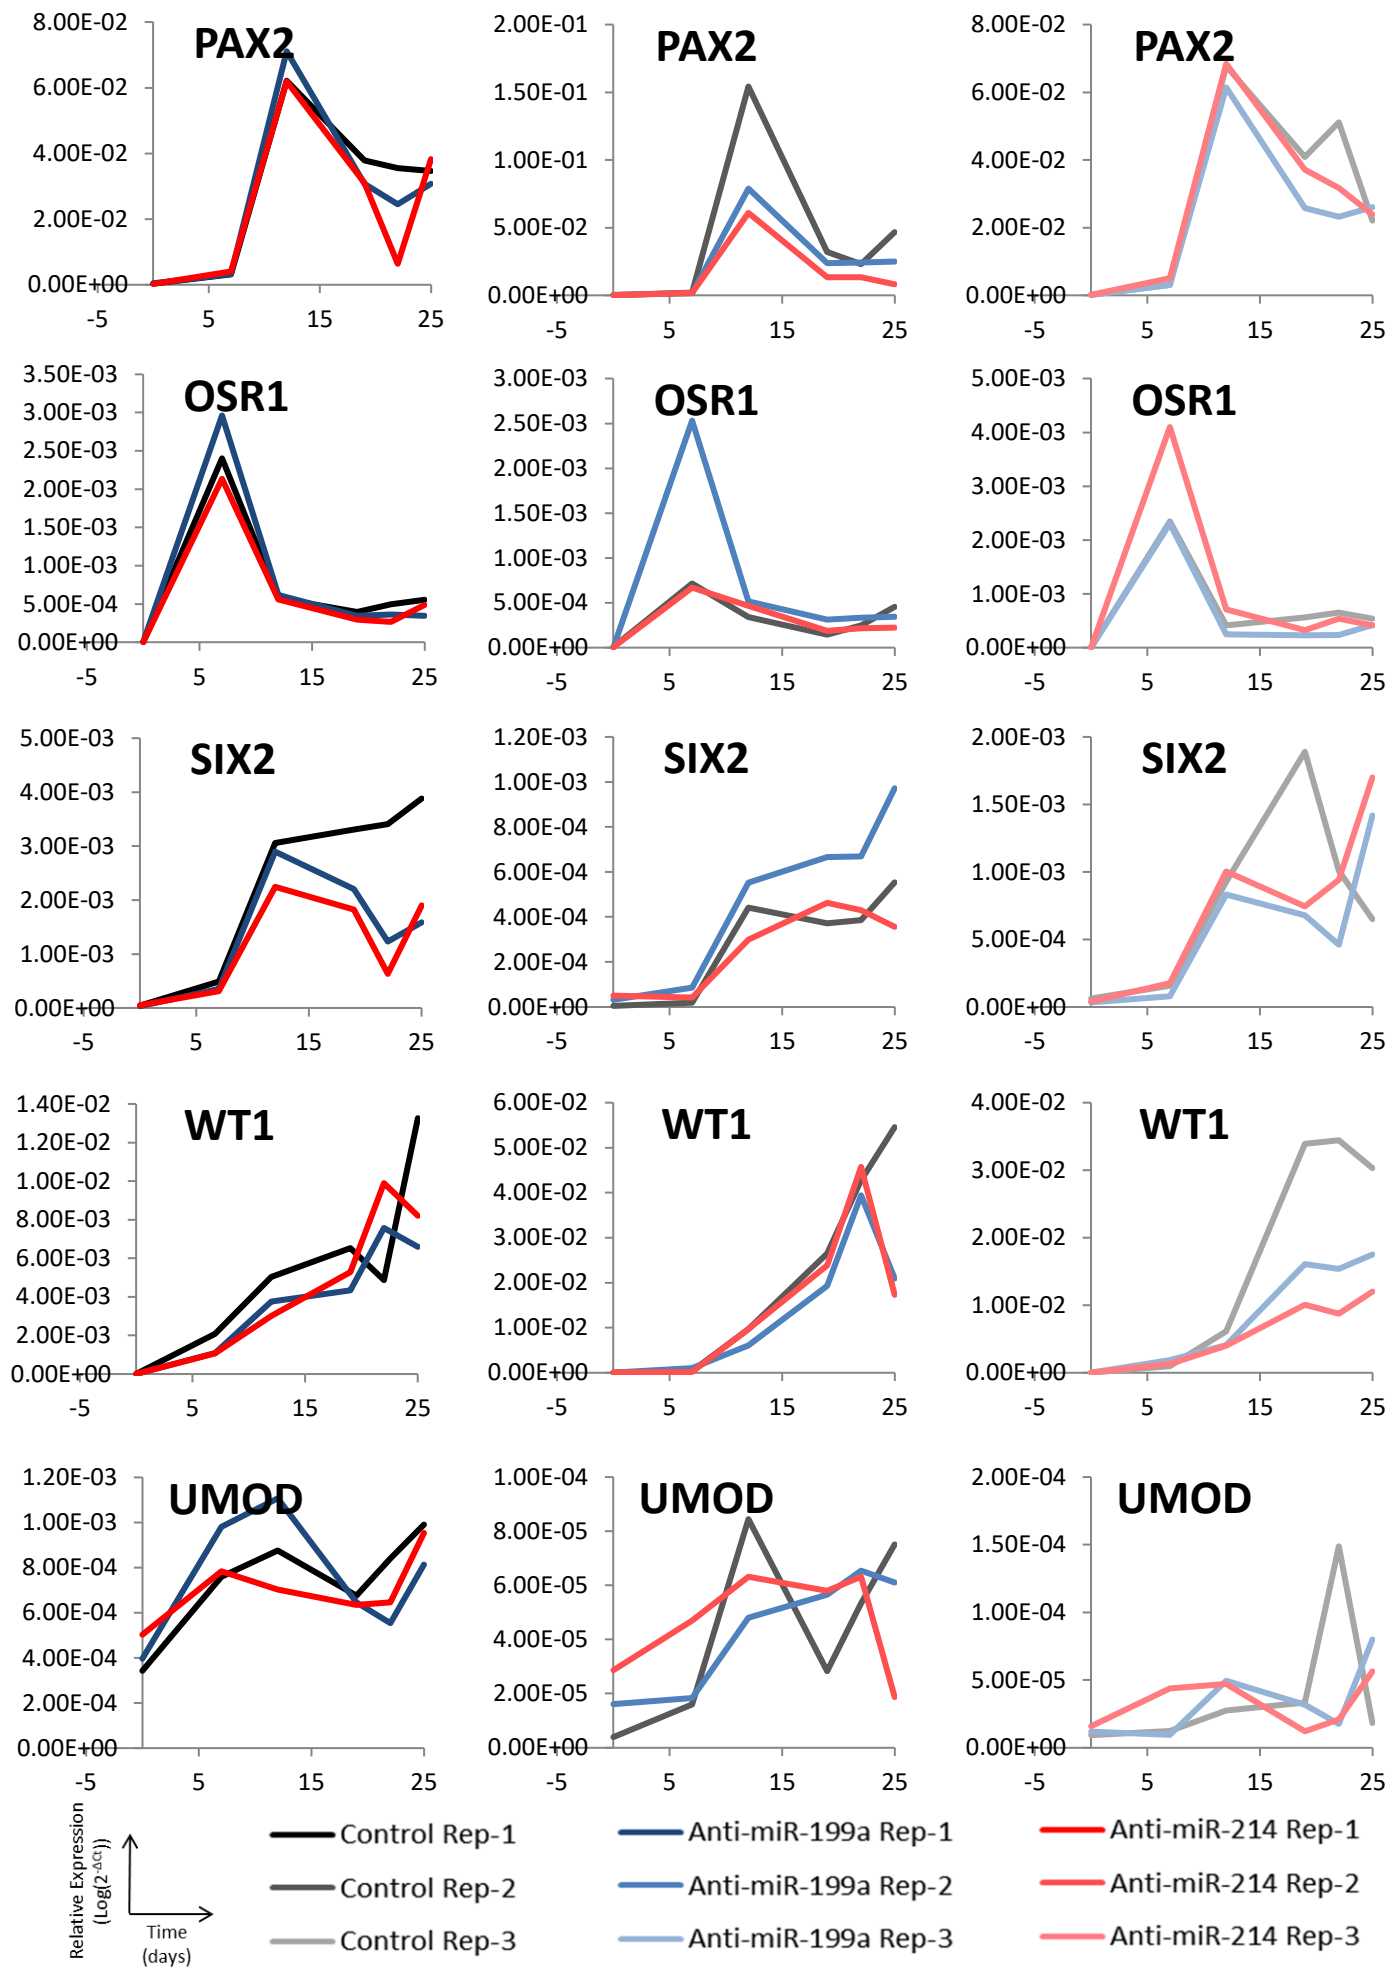

**Figure S5 (Continued)**

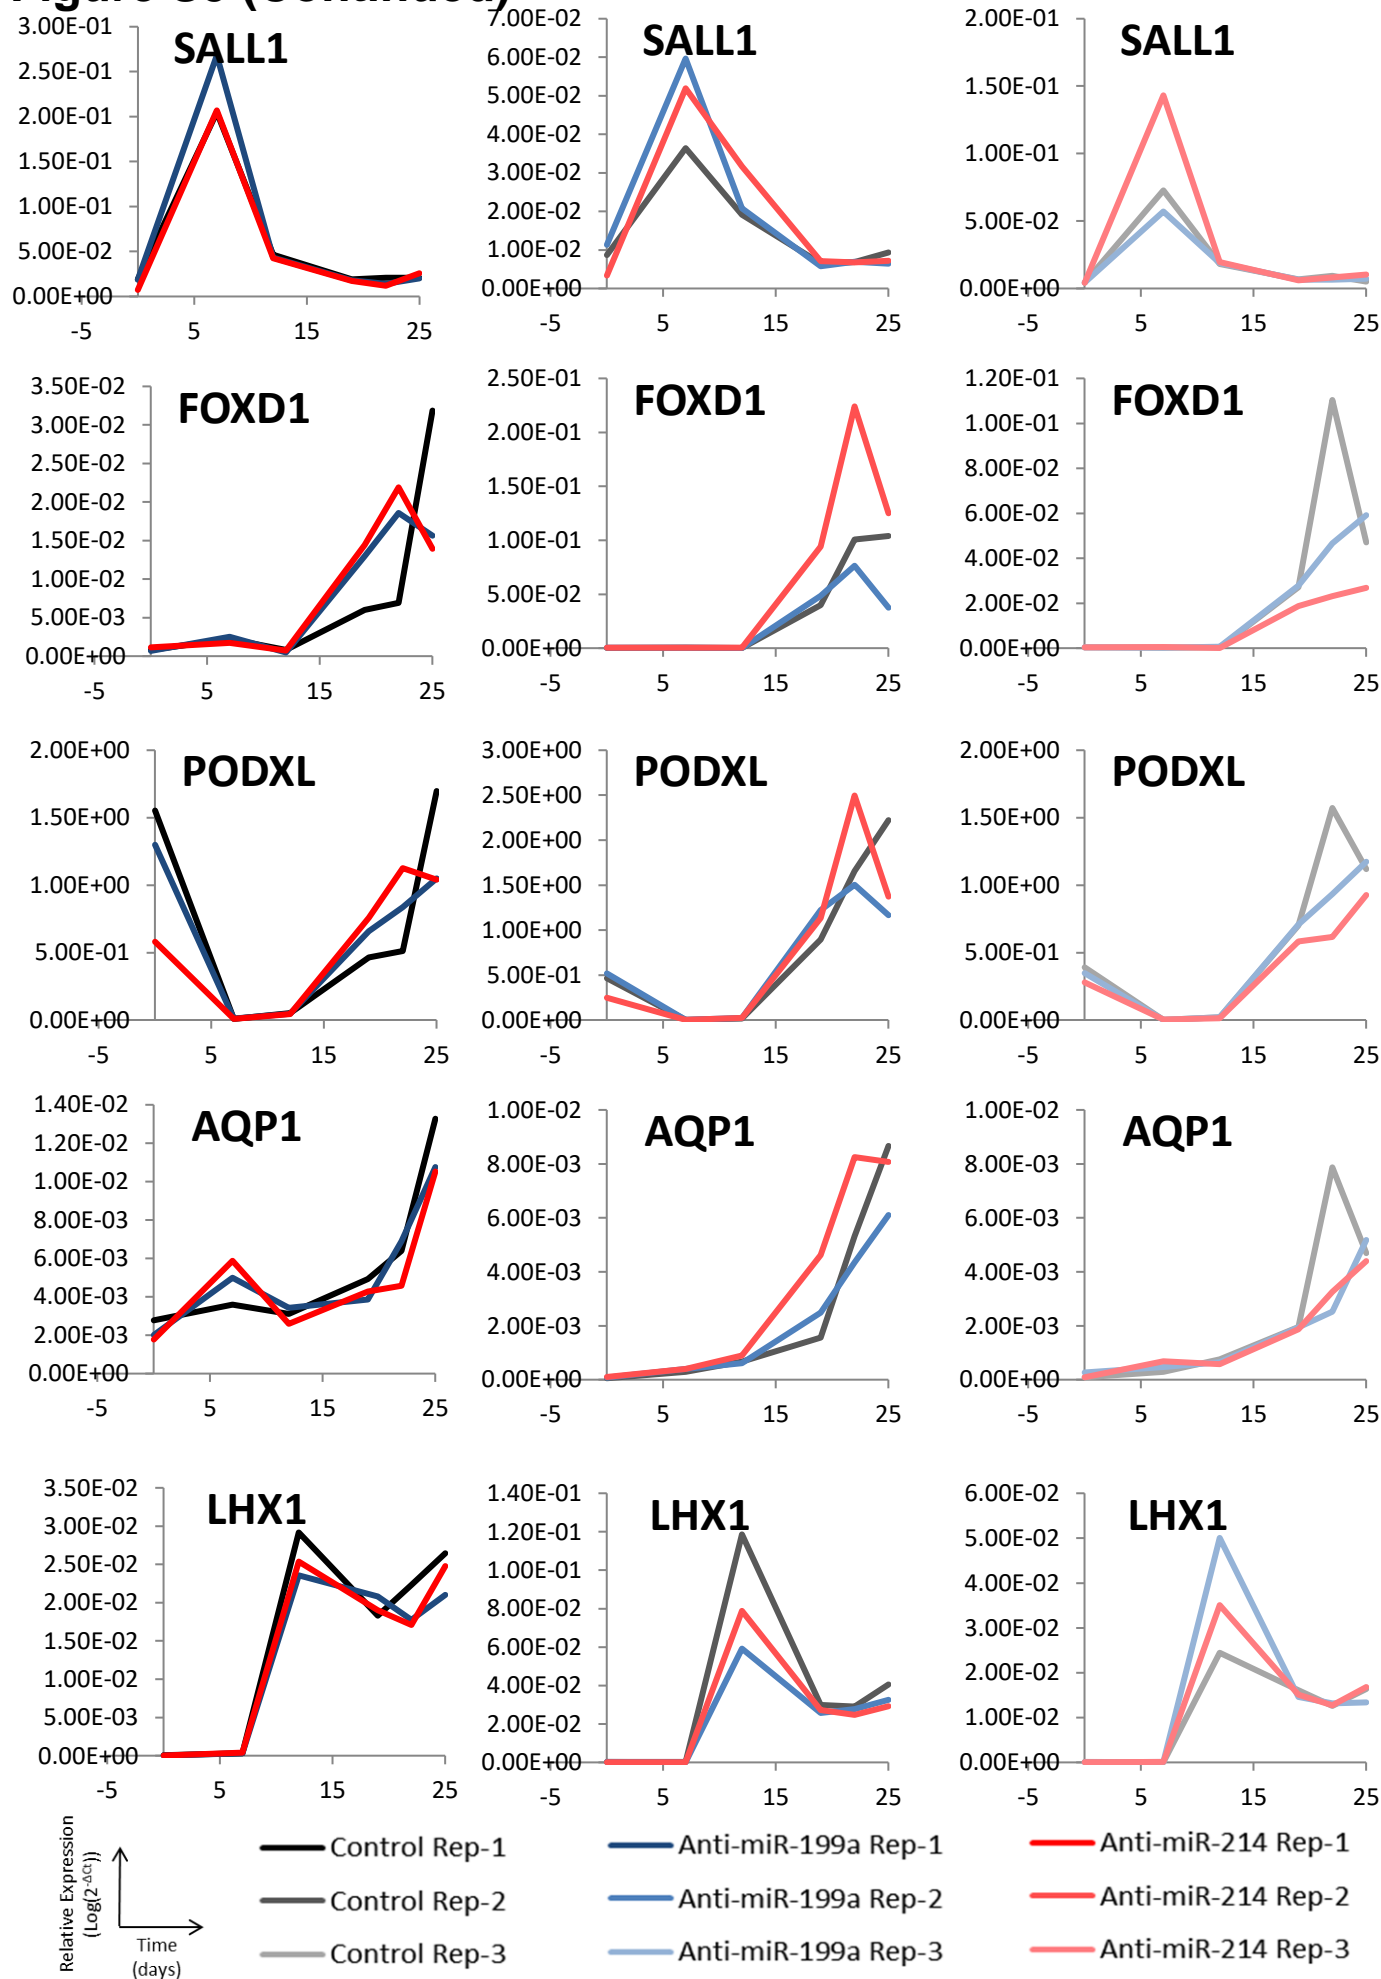

**Figure S5 (Continued)**

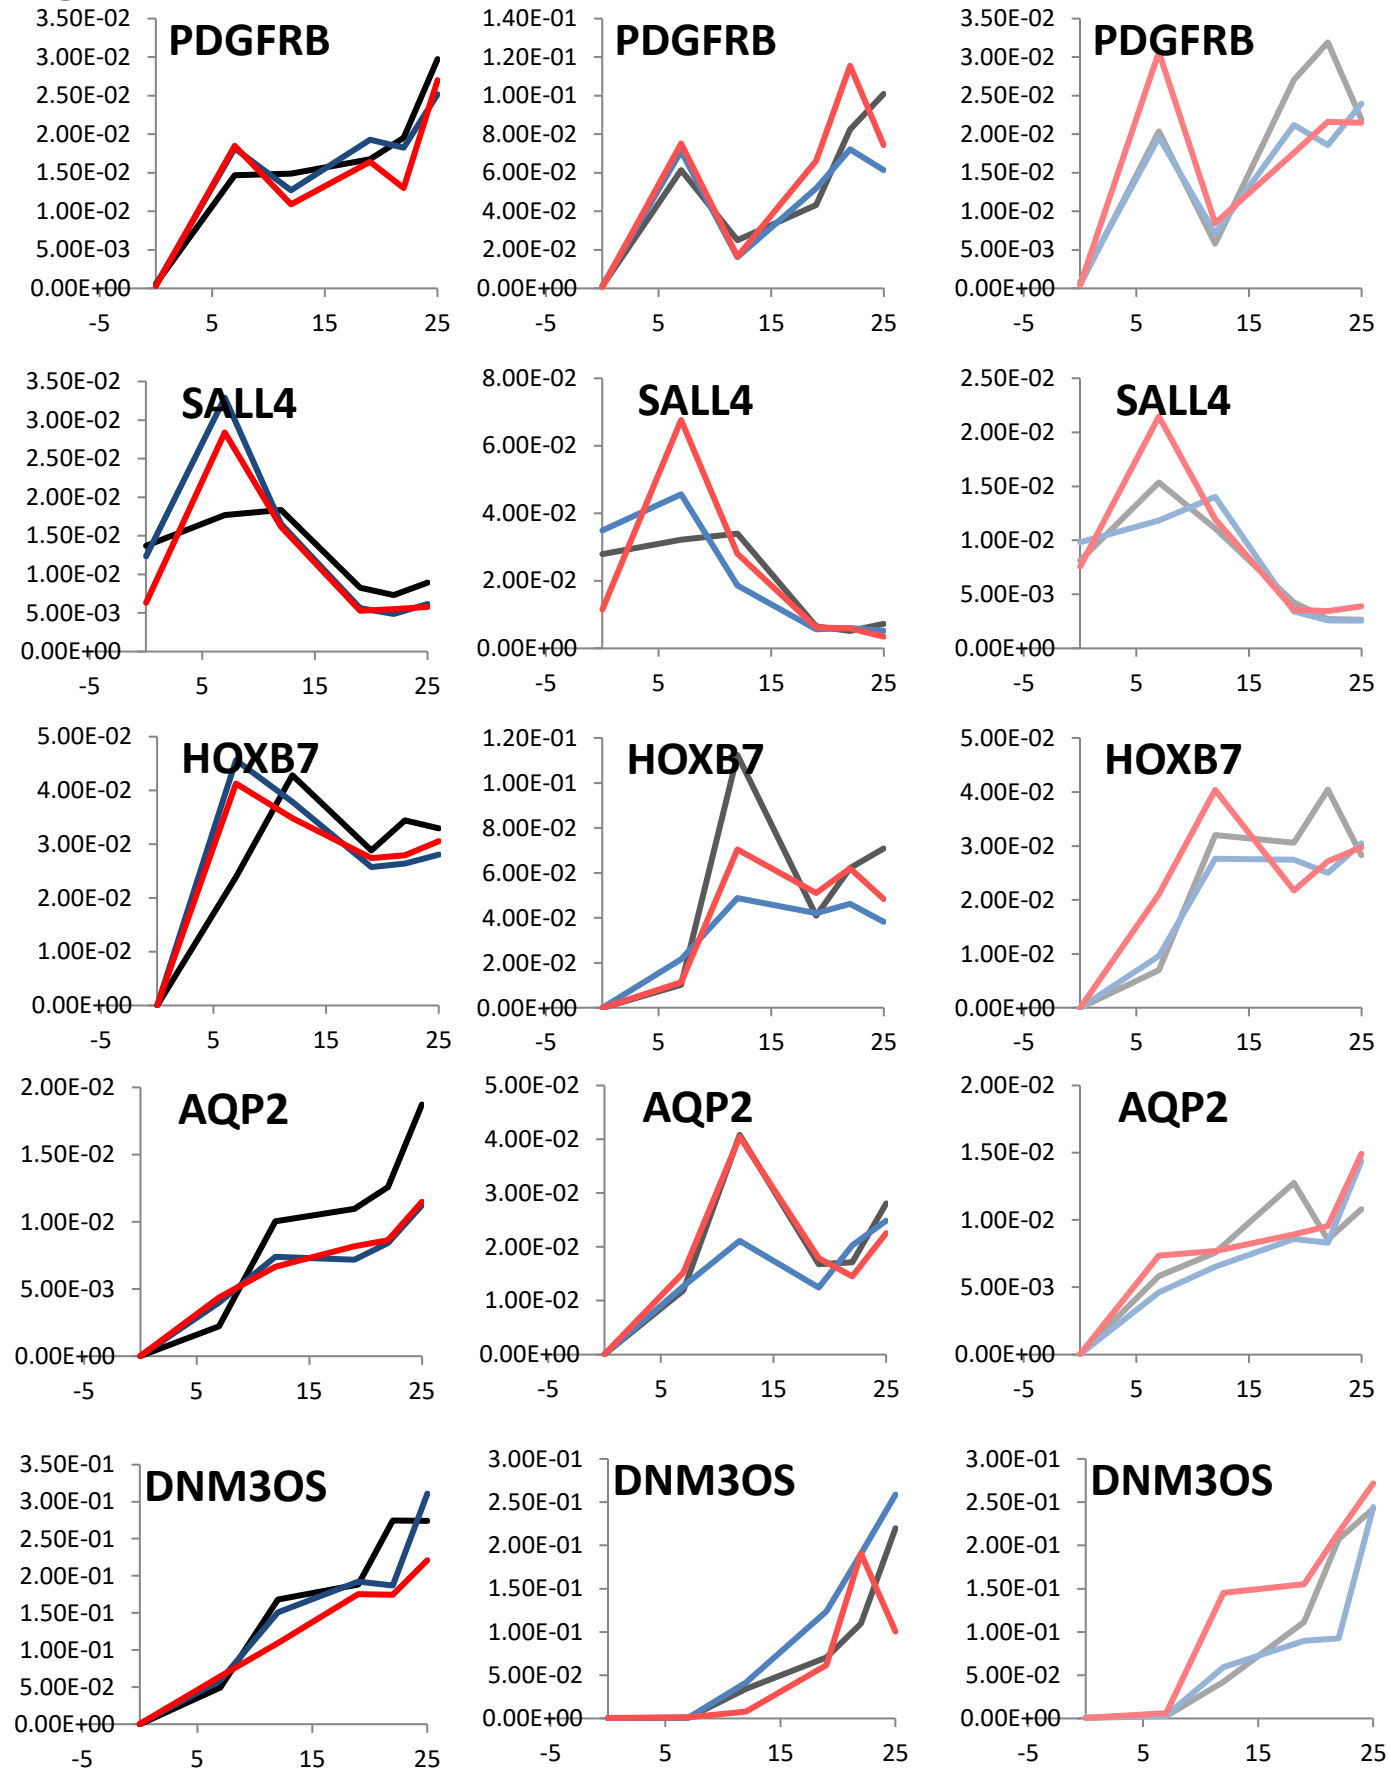

Relative Expression  
(Log<sub>2</sub><sup>-ΔC<sub>T</sub></sup>)

Time  
(days)

— Control Rep-1  
— Control Rep-2  
— Control Rep-3

— Anti-miR-199a Rep-1  
— Anti-miR-199a Rep-2  
— Anti-miR-199a Rep-3

— Anti-miR-214 Rep-1  
— Anti-miR-214 Rep-2  
— Anti-miR-214 Rep-3

**Figure S5 (Continued)**

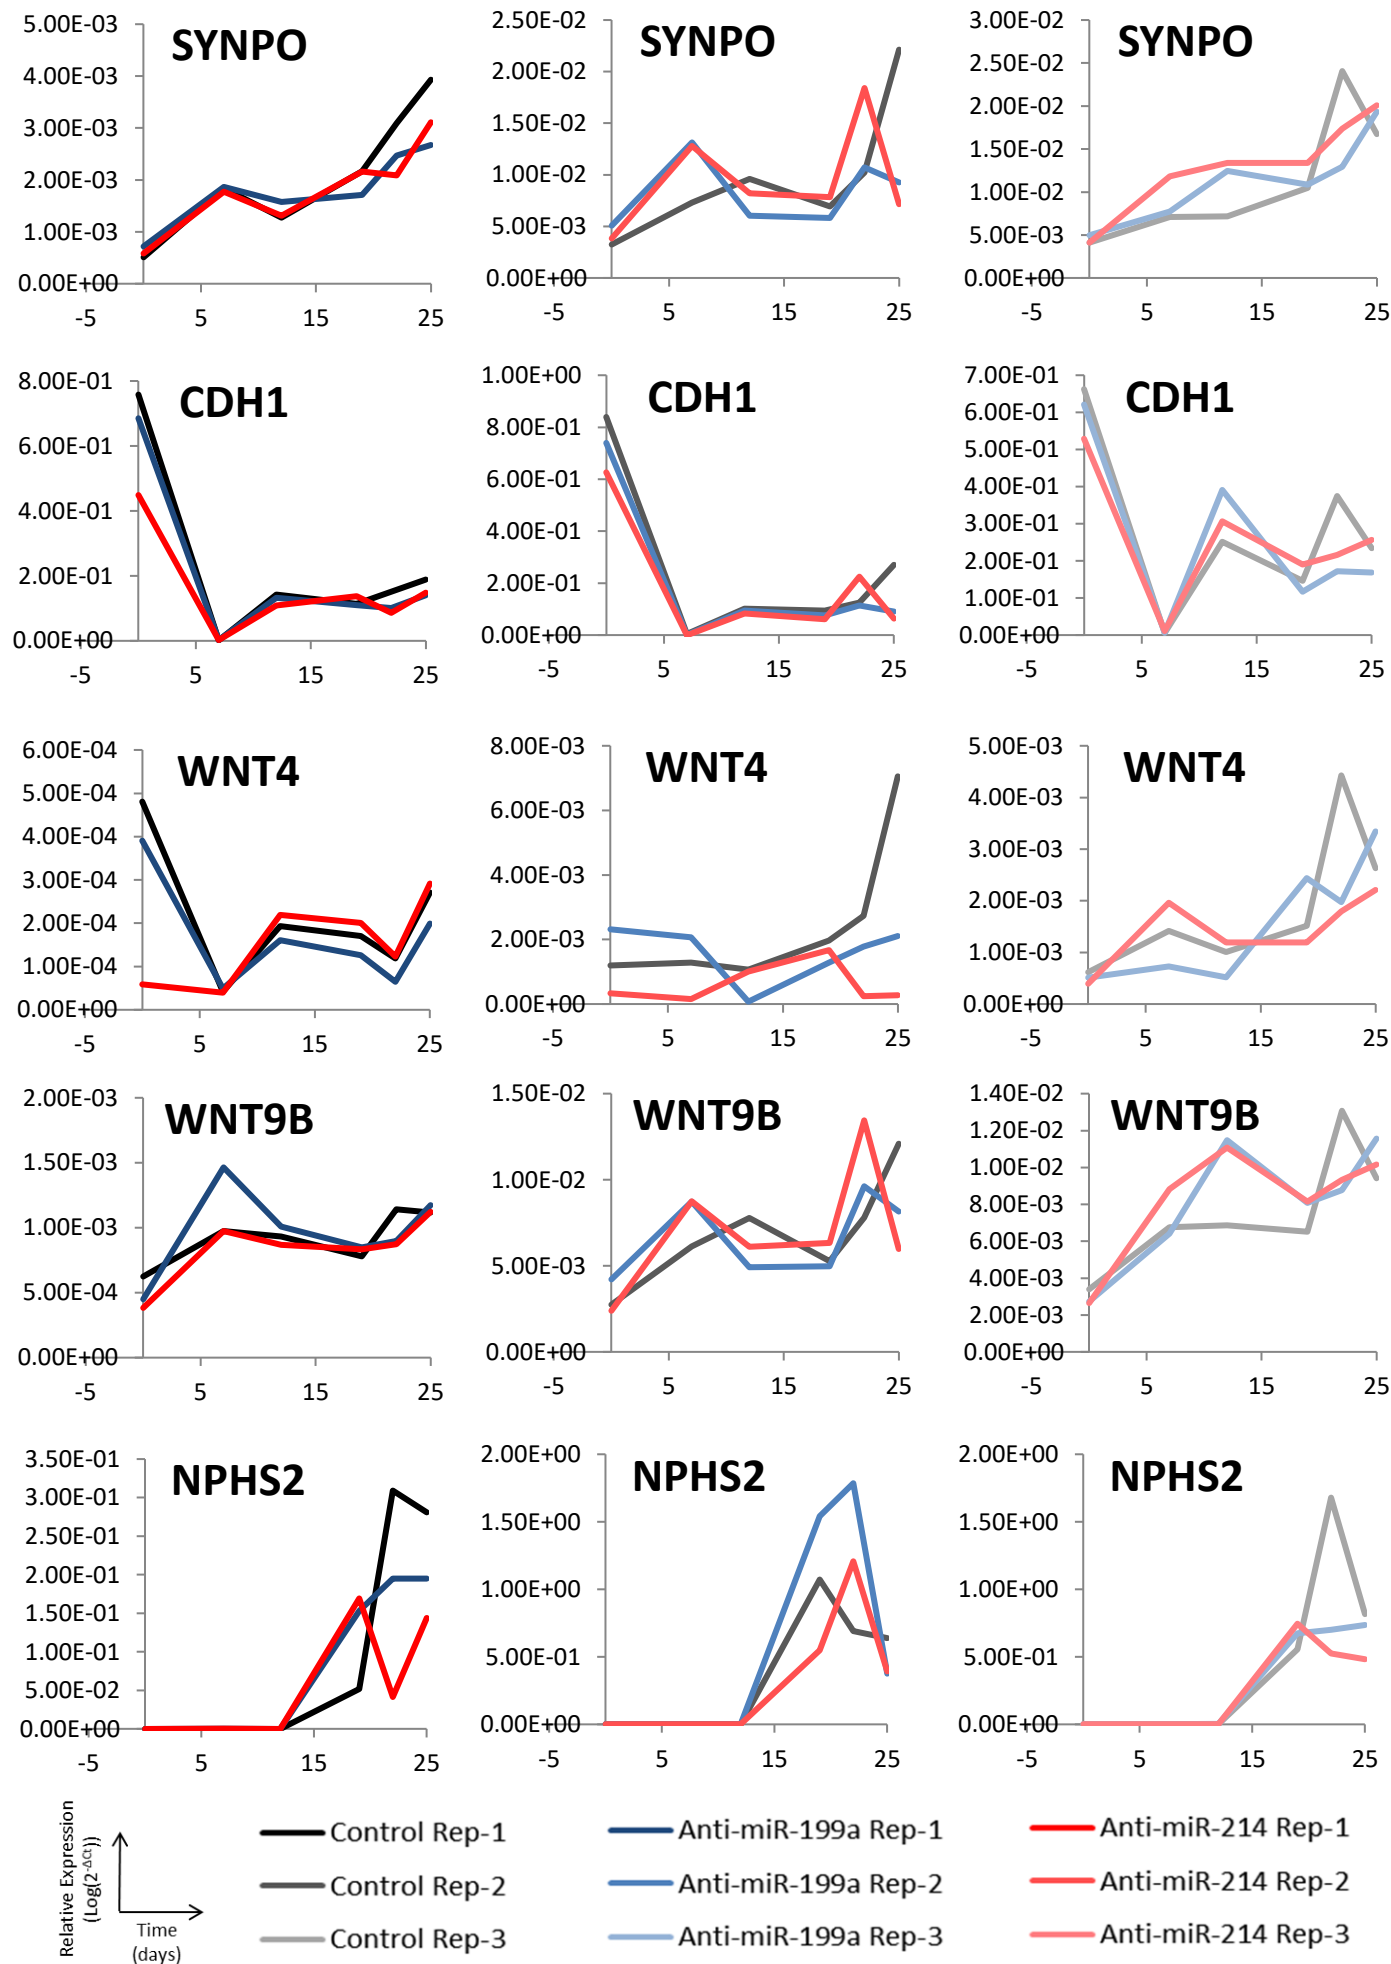



# Figure S5 (Continued)

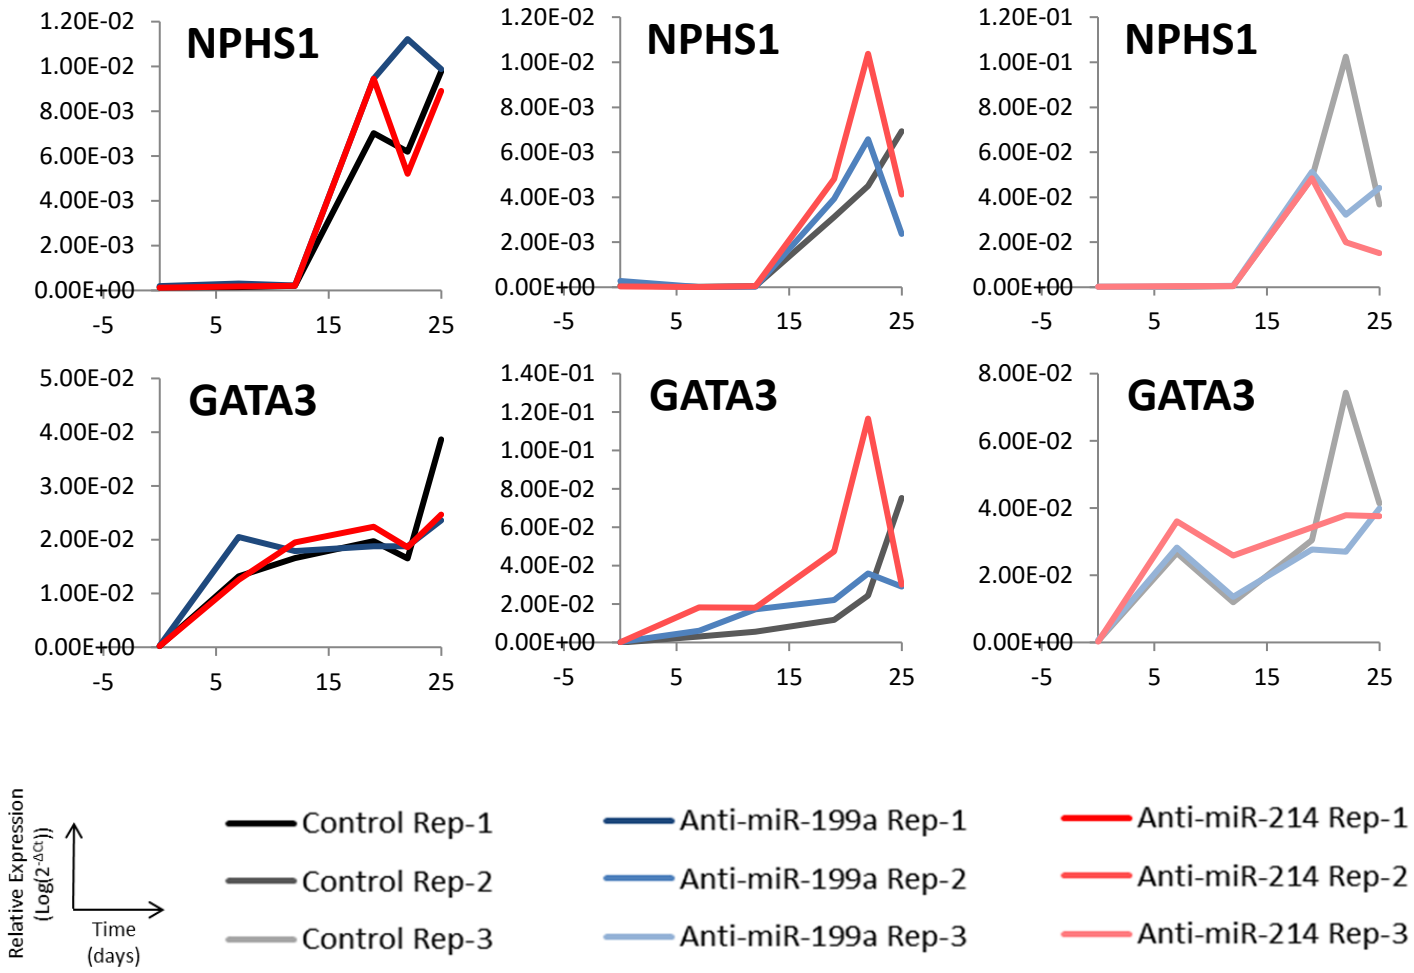

**Figure S5.** QPCR analysis of key marker gene expression in developing 3D kidney organoids derived from MAN13 hESCs transduced with either control or anti-miRNA sponge-expressing lentiviruses.

**Figure S6**

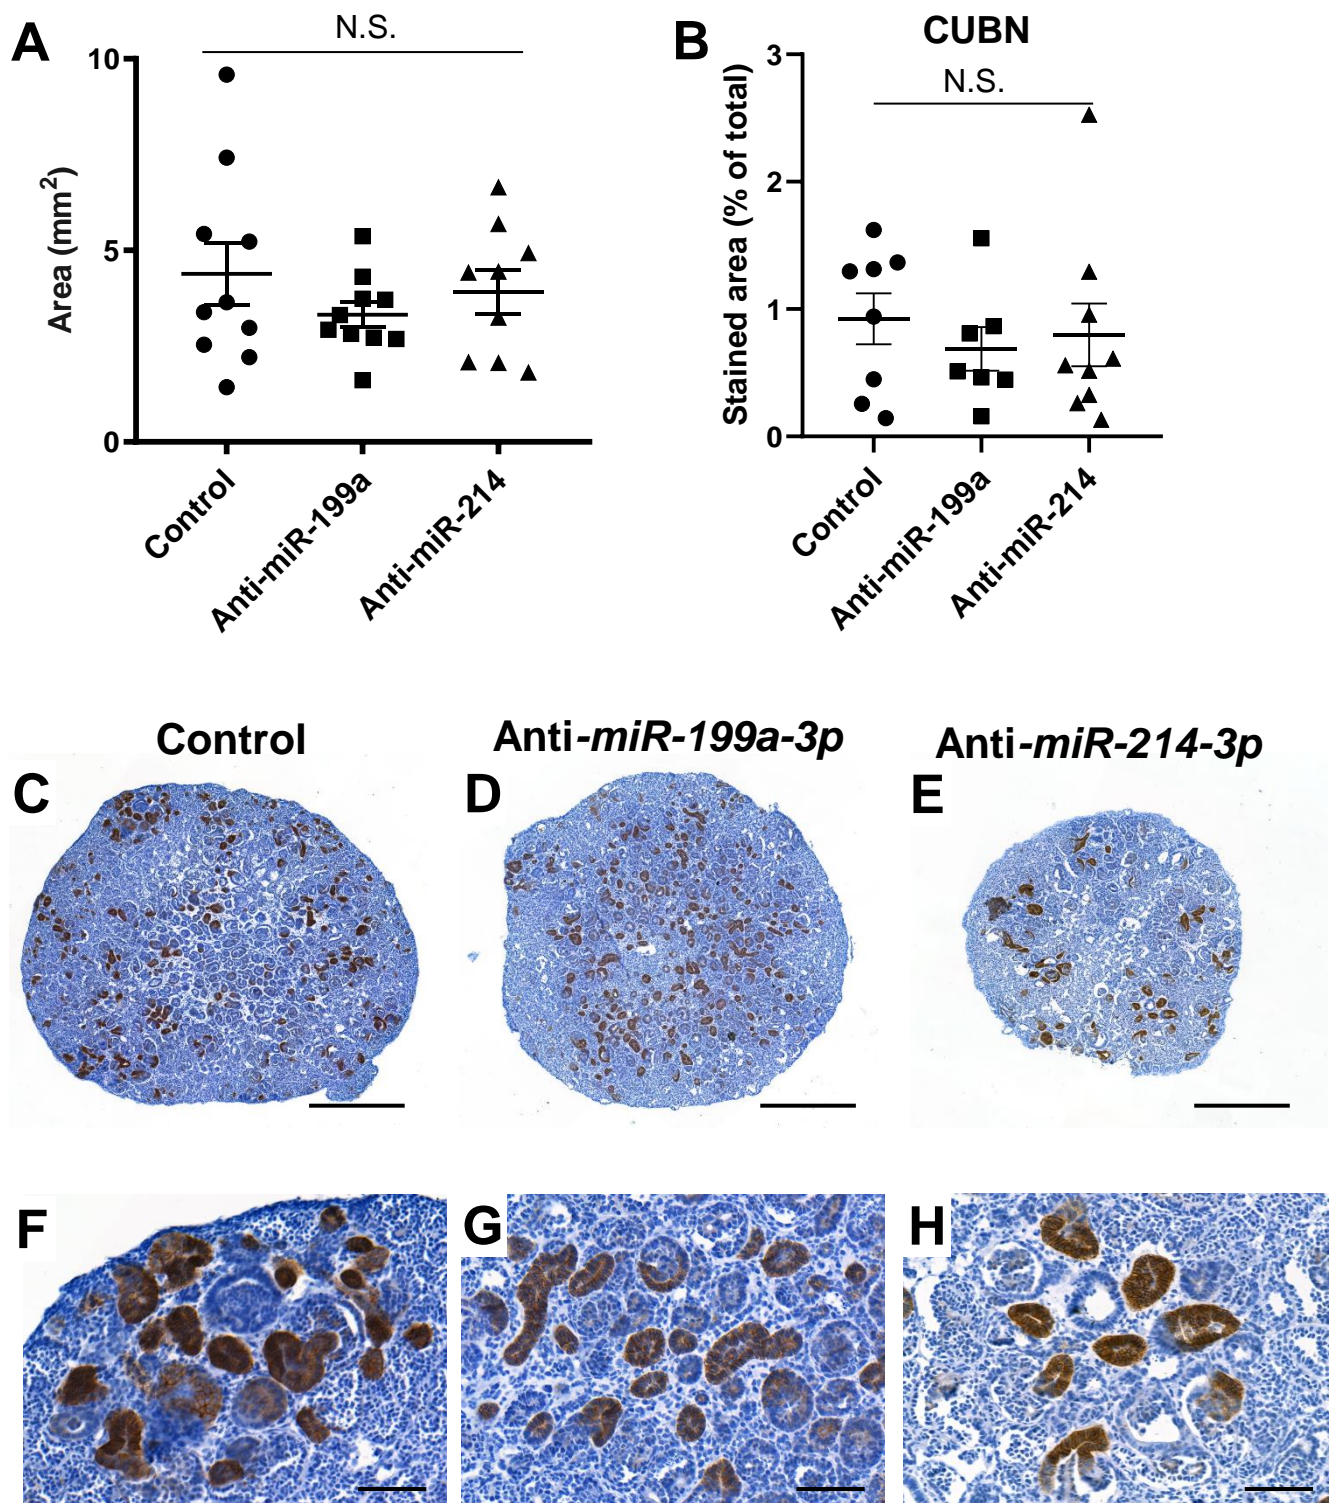

**Figure S6.** Size, total CUBN expression and CDH1 expression of anti-miRNA sponge-treated organoids.

**Figure S7**

**A**

**Anti-*miR-199a-3p***

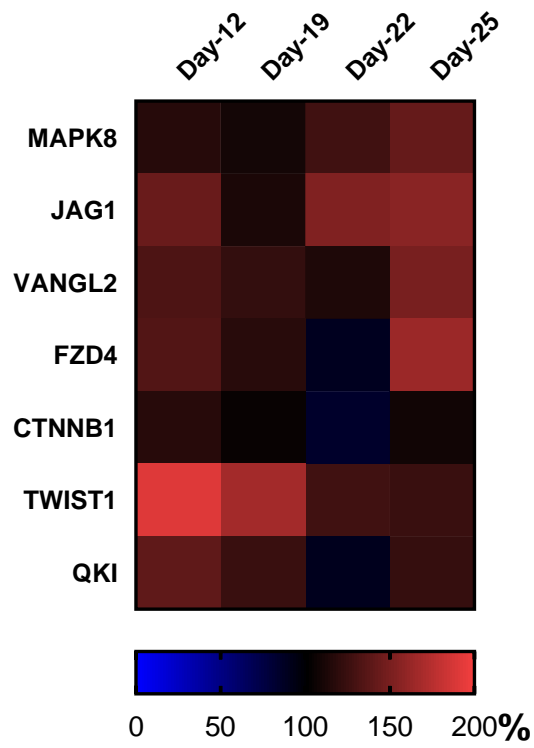

**B**

**Anti-*miR-214-3p***

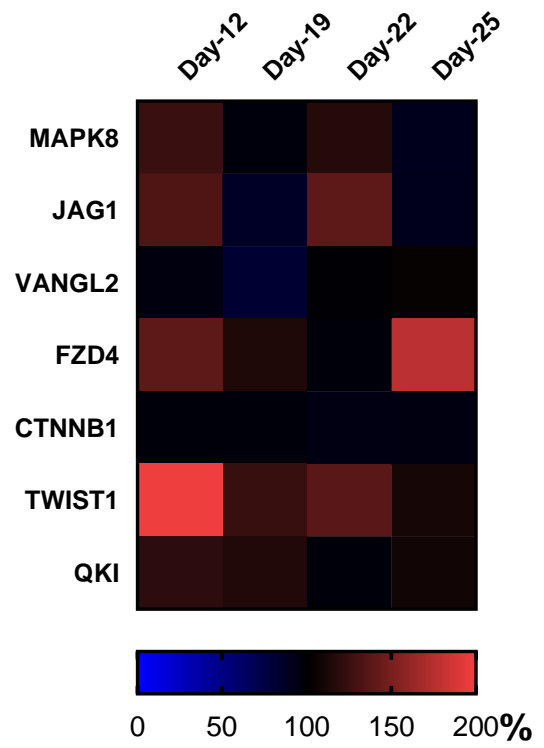

**Figure S7.** Derepression of targets of the *miR-199a/214* cluster, in the presence of anti-miRNA sponges..

## SUPPLEMENTAL FIGURE LEGENDS

**Figure S1** (Related to Figure 3). qPCR analysis of *miR-199a/214* cluster expression during 2D kidney differentiation in (A) MAN11 and (B) HUES1 hESCs. Different colours denote separate runs of the experiment.

**Figure S2** (Related to Figure 4). Inhibition of *miR-199a-5p*, *miR-199a-3p* or *miR-214-5p* by miRNA sponges in MAN13 differentiating 2D cultures did not alter the morphology of the developing epithelium, as shown by immunostaining with an anti-CDH1 antibody (compare to control in Figure 4).

**Figure S3.** (Related to Figure 4). Overexpression of *miR-199a* and *miR-214* in differentiating 2D cultures. MAN11 hESCs were transduced with either control or miRNA-overexpressing lentiviral vectors and differentiated to kidney in 2D (schematically shown in (A)). (B-E) Cultures were fixed at day 19 of differentiation and stained with antibodies against WT1. Overexpression of *miR-199a* or *miR-199a and miR-214 together* resulted in an increase of the WT1<sup>+</sup> cell population (MM) in emanating cell aggregates. Scale bars: 120µm. (F) Quantification of WT1<sup>+</sup> in kidney cell aggregates (one differentiation experiment; dots represent separate images taken from the same run of the experiment; mean±S.E.M. \*P<0.001, ANOVA followed by post-hoc t-tests). (G-J) Day 19 cultures were also immunostained for CDH1. Overexpression of *miR-199a* or *miR-199a and miR-214 together* resulted in a decrease of the CDH1<sup>+</sup> epithelia in emanating cell aggregates. (K-L) Cultures were also fixed at day 30 (end of protocol) and immunostained for CDH1, revealing a change in morphology of the epithelial structures, towards a more rounded, compact shape after *miR-199a overexpression*. Scale bar: 60µm. (M) Example cell aggregate with schematic overlay explaining the metrics used to quantify its shape, following overexpression of the miRNAs. Parameters measured were: The length of the aggregate along its longest CDH1<sup>+</sup> axis (red), quantified in (N); the ratio of the area of the main axis (blue) divided by the length (red), as a measure of how wide or elongated the aggregate was, quantified in (O); the number of branching points (yellow) per unit length of the main axis, quantified in (P). Overall, *miR-199a* overexpression (or overexpression of both miRNAs together) resulted in more rounded aggregates. Results in (N-P) are from one differentiation experiment, with between 32 and 57 aggregates measured per experimental group. Mean±S.E.M; \*P<0.001, Kruskal-Wallis followed by post-hoc Dunn's tests.

**Figure S4.** (Related to Figures 6 and 7). Lentiviral-mediated expression in 3D organoids. Example of a day 25 organoid, derived from MAN13 hESCs that were transduced with a lentiviral vector expressing an anti-miR-199a-3p sponge and an EGFP tag (see schematic representation of the vector in figure 3A). The transgenes continue to be expressed through to the end of the differentiation protocol, as shown by the persistence of the EGFP signal. Scale bars: 600µm.

**Figure S5.** (Related to Figures 6 and 7). QPCR analysis of key marker gene expression in developing 3D kidney organoids derived from MAN13 hESCs transduced with either control or anti-miRNA sponge-expressing lentiviruses. The results of three independent differentiation experiments are shown in each case. At least three organoids were pooled for each RNA sample, at each time point. Expression shown as  $2^{-\Delta C_t}$  relative to GAPDH against time.

**Figure S6.** (Related to Figures 6 and 7). Size, total CUBN expression and CDH1 expression of anti-miRNA sponge-treated organoids. (A) Quantification of the size of histological sections used in IHC experiments, showed that inhibition of *miRNA-199a-3p* or *miR-214-3p* activity had no effect on the overall mid-section area of organoids, reflecting their size. (Mean ± S.E.M.; each dot represents a separate organoid; organoids from three independent experiments were used; N.S.: Not significant, ANOVA). (B) Quantification of the extent of CUBN staining over entire histological sections showed that there was no significant change in the proportional area of CUBN<sup>+</sup> tubules (Mean ± S.E.M.; each dot represents a separate organoid; organoids from three independent experiments were used; N.S.: Not significant, ANOVA). (C-E) Low and (F-H) higher magnification representative images of sections from control and anti-miRNA sponge-treated organoids, immunostained for CDH1 (brown, over haematoxylin (blue) counterstain). Scale bars: A-C, 500µm; D-F, 100µm.

**Figure S7.** (Related to figures 6 and 7). Derepression of targets of the *miR-199a/214* cluster, in the presence of anti-miRNA sponges. (A, B) Heatmaps showing the derepression of key kidney developmental genes in anti-miRNA sponge treated organoids, during their differentiation. Gene expression was determined at different time points by qPCR, and each box of the map represents the change of expression relative to untreated controls (set at 100%, in each case). Each box on the map is the median of three independent differentiation experiments.

**SUPPLEMENTAL TABLES**

**Table S1. Antibodies used in immunocytochemical (ICC) and immunohistochemical (IHC) analyses. (Related to Experimental Procedures).**

| <b>Antibody</b> | <b>Host</b> | <b>Source</b>   | <b>Catalogue #</b> | <b>Application</b> | <b>Dilution</b> |
|-----------------|-------------|-----------------|--------------------|--------------------|-----------------|
| CUBN            | Goat        | Santa Cruz      | sc-20607           | IHC                | 1:100           |
| CDH1            | Mouse       | Abcam           | 76055              | ICC                | 1:300           |
|                 |             |                 |                    | IHC                | 1:1000          |
| MEIS1/2/3       | Mouse       | Active Motif    | 39796              | IHC                | 1:200           |
| PODXL           | Mouse       | R&D Systems     | MAB1658            | IHC                | 1:200           |
| PECAM1 (CD31)   | Mouse       | Cell Signalling | 3528               | IHC                | 1:100           |
| SYNPO (H-140)   | Rabbit      | Santa Cruz      | sc-50459           | IHC                | 1:200           |
| WT1             | Rabbit      | Santa Cruz      | sc-192             | ICC                | 1:100           |
| WT1             | Rabbit      | Calbiochem      | CA1026             | IHC                | 1:1000          |

**Table S2. Primers used for quantitative PCR. (Related to Experimental Procedures).**

| <b>Gene Name</b> | <b>Forward or Reverse</b> | <b>Sequence</b>           |
|------------------|---------------------------|---------------------------|
| AQP1             | Fwd                       | ATTAACCCTGCTCGGTCCTT      |
| AQP1             | Rev                       | ACCCTGGAGTTGATGTCGTC      |
| AQP2             | Fwd                       | GTGCGCCGAAAATTTCCA        |
| AQP2             | Rev                       | CCTCGACTTCTCCTTGAAGCA     |
| CDH1             | Fwd                       | CAATACATCTCCCTTCACAGCA    |
| CDH1             | Rev                       | AATGATAGATTCTTGGGTGGGTC   |
| CITED2           | Fwd                       | CACCAATGGGCTGCACCATCAC    |
| CITED2           | Rev                       | GCCGCTCGTGGCATTTCATGTTG   |
| CTNNB1           | Fwd                       | GCCACAAGATTACAAGAAACGG    |
| CTNNB1           | Rev                       | CAAGATCAGCAGTCTCATTTCCA   |
| DNM3OS           | Fwd                       | CTTACAATGCTTCCACTTCTCTG   |
| DNM3OS           | Rev                       | TCTGCCTTCGTTTACAAATTC     |
| FZD4             | Fwd                       | CTGACAACCTTTCACACCGCT     |
| FZD4             | Rev                       | CATTGGCACATAAACAGAACAAAGG |
| GAPDH            | Fwd                       | AGCCACATCGCTCAGACAC       |
| GAPDH            | Rev                       | GCCAATACGACCAAATCC        |
| GATA3            | Fwd                       | GCCCCTCATTAAGCCCAAG       |
| GATA3            | Rev                       | TTGTGGTGGTCTGACAGTTTCG    |
| HOXB7            | Fwd                       | GCCTACAAATCATCCGGCCA      |
| HOXB7            | Rev                       | GGTTGGAAGCAAACGCACAA      |
| JAG1             | Fwd                       | CTTACCTTGTGCCTTTGGA       |
| JAG1             | Rev                       | GGTCTCCCTGAACTTCCTG       |
| LHX1             | Fwd                       | ATGCAACCTGACCGAGAAGT      |

|        |     |                           |
|--------|-----|---------------------------|
| LHX1   | Rev | CAGGTCGCTAGGGGAGATG       |
| MAPK8  | Fwd | CTCTCCTTTAGGTGCAGCAG      |
| MAPK8  | Rev | CGGATCTGTTGACATTGAAGAC    |
| NPHS1  | Fwd | AGTGTGGCTAAGGGATTACCC     |
| NPHS1  | Rev | TCACCGTGAATGTTCTGTTCC     |
| NPHS2  | Fwd | CAAAGTGCGGATGATTGCTG      |
| NPHS2  | Rev | GTGTGGAGGTATCGAAGCTG      |
| OSR1   | Fwd | CTCCTCGAGATCCGGATTGAG     |
| OSR1   | Rev | GTTCACTGCCTGAAGGAAGG      |
| PAX2   | Fwd | GCAACCCCGCCTTACTAAT       |
| PAX2   | Rev | AACTAGTGGCGGTCATAGGC      |
| PDGFRB | Fwd | GCCGTCAAGATGCTTAAATCC     |
| PDGFRB | Rev | TATAGATGGGTCCTCCTTTGGT    |
| PODXL  | Fwd | TCATCATCACCATCGTCTGC      |
| PODXL  | Rev | CCACCTTCTTCTCCTGCATC      |
| QKI    | Fwd | CTGATGAACGACAAGAAGCTC     |
| QKI    | Rev | CGTACTCTGCTAATTTCTTCGTC   |
| SALL1  | Fwd | AGCGAAGCCTCAACATTTCCAATCC |
| SALL1  | Rev | AATTCAAAGAACTCGGCACAGCACC |
| SALL4  | Fwd | CAGATCCACGAGCGGACTCA      |
| SALL4  | Rev | CCCCGTGTGTCATGTAGTGA      |
| SIX2   | Fwd | CGCCCATGTGGGTCAGTGGG      |
| SIX2   | Rev | AGCCGGGAGCGCTGTAGTCA      |
| SYNPO  | Fwd | CATGGTGGAAAGGAGGATGATGG   |
| SYNPO  | Rev | ACTTGGGGTTCGGAGCTGGGATAC  |
| TWIST1 | Fwd | CTTCTCGGTCTGGAGGATGG      |
| TWIST1 | Rev | TTCTCCTTCTCTGGAAACAATGAC  |
| UMOD   | Fwd | AACATCACTGATATCTCCCTCCT   |
| UMOD   | Rev | TTGTCTCTGTCATTGAAGCCC     |
| VANGL2 | Fwd | GATGAGCGGGATGACAACCTG     |
| VANGL2 | Rev | GTGTGAGGTCATCATGGGAG      |
| WNT4   | Fwd | ACCTGGAAGTCATGGACTCG      |
| WNT4   | Rev | TCAGAGCATCCTGACCACTG      |
| WNT9B  | Fwd | AGTACAGCACCAAGTTTCTGAG    |
| WNT9B  | Rev | ACTCTTCACAGCCTTGATGC      |
| WT1    | Fwd | GGCAGCACAGTGTGTGAACT      |
| WT1    | Rev | CCAGGCACACCTGGTAGTTT      |

## SUPPLEMENTAL EXPERIMENTAL PROCEDURES

### *Quantitative PCR*

QPCR for the *DNM3OS* and protein-coding transcripts was performed using the TaqMan® RNA-to-Ct™ 1-Step Kit (ThermoFisher, #4392653) according to the manufacturer's instructions, on a BioRad C1000™ Thermal Cycler fitted with a CFX384™ Real Time System, using 15ng of RNA per reaction. GAPDH was used as the housekeeping gene to normalise readings between samples. Primers used are listed in Table S2.

For mature miRNA detection, the following TaqMan™ miRNA Assays (ThermoFisher, #4366597) were used: *hsa-miR-199a* (assay number #000498), *hsa-miR-199a\** (assay number #000499), *hsa-miR-214* (assay number #002306), *hsa-miR-214\** (assay number #002293). All readings were normalised against the *RNU6b* (assay number #001093). Ten ng of RNA were reverse transcribed in a 15µl reaction, using the TaqMan™ MicroRNA Reverse Transcription kit (ThermoFisher #4366596) and the RT primer of the appropriate miRNA assay according to the manufacturer's instructions. For the PCR, 1µl of the RT reaction was amplified in a total volume of 15µl, using the appropriate miRNA Assay mix and TaqMan™ Universal Mastermix II, no UNG (ThermoFisher, #4440040) according to the manufacturer's instructions.

### *In situ hybridisation of miRNA in kidney tissue and 3D organoid sections*

3D organoids were fixed in 4% paraformaldehyde, embedded in paraffin and sectioned at 5 µm. Digoxigenin-labelled miRCURY LNA® probes against *miR-199a-3p* (#YD00615410) and *miR-214-3p* (#YD00611471) and a control scrambled probe (#YD00699004) were purchased from QIAGEN and used according to the manufacturer's instructions. Proteinase K (QIAGEN, miRCURY LNA miRNA ISH Buffer Set (FFPE), #339450) treatment was for 10min, at 0.33x strength, at 37°C. Scrambled and anti-*miR-199a* probes were used at a final concentration of 40nM, whereas the anti-*miR-214-3p* probe was used at 1nM at a hybridisation temperature of 55°C. An alkaline phosphatase-linked, sheep anti-digoxigenin antibody (Sigma-Aldrich, #11093274910) was then used at 1:400 dilution. The alkaline phosphatase catalysed reaction was allowed to proceed for 2h followed by counterstaining with Nuclear Fast Red. Images were acquired on a 3D-Histech Panoramic-250 microscope slide-scanner using a 40x/0.95 Plan Apochromat objective (Zeiss). Snapshots of the slide-scans were taken using the Case Viewer software (3D-Histech).

### *Immunostaining of 2D cultures*

Cells were washed twice in PBS and then fixed in 4% paraformaldehyde (PFA) for 20 minutes, followed by another two PBS washes. The fixed cells were blocked and permeabilised for 30 min with 3% bovine serum albumin (BSA)/0.3% Triton-X in PBS before overnight incubation at 4°C with primary antibodies (Table S1) diluted in 3% BSA/PBS. They were then washed three times with PBS/0.1% Triton-X, followed by Alexa-Fluor™-488- or Alexa-Fluor™-594-labelled, anti-mouse or anti-rabbit (as needed) (Life Technologies; 1:300 dilution in 3% BSA/PBS). Images were captured on an Olympus IX-71 inverted fluorescence microscope and captured using a QImaging Retiga SRV camera. Images were then processed and analysed using ImageJ (<http://imagej.net/Fiji/Downloads>).

### *Immunohistochemistry on 3D organoid sections*

Tissue was fixed in 4% paraformaldehyde, embedded in paraffin and sectioned at 5 µm. Sections were dewaxed and rehydrated. After rehydration, slides were boiled in an 800W microwave in 10 mM sodium citrate buffer (pH 6.0). After cooling to room temperature, endogenous peroxidase activity was blocked using 0.3% H<sub>2</sub>O<sub>2</sub> in PBS for 10 minutes. Sections were permeabilized using 0.2% Triton X-100 (Sigma-Aldrich) for 10 minutes and blocked using 1% bovine serum albumin (BSA) with 10% serum from the species in which the secondary antibody was raised. Sections were incubated overnight at 4°C with the primary antibody + 1% BSA. Primary antibodies used are listed in Table S1. Biotin-conjugated species specific secondary antibodies with 1% BSA were incubated at room temperature for 2 hours. Following

PBS washes, slides were incubated in avidin-biotin enzyme complex (Vector Laboratories VECTASTAIN Elite ABC Reagent, PK-6100) for 1 hour at room temperature. Peroxidase activity was detected with the 3, 3'-diaminobenzidine (DAB) peroxidase substrate solution (Vector Laboratories, SK4100). Images were acquired on a 3D-Histech Panoramic-250 microscope slide-scanner using a 40x/0.95 Plan Apochromat objective (Zeiss). Snapshots of the slide-scans were taken using the Case Viewer software (3D-Histech).

#### *Lentiviral vector production and hESC transduction*

Briefly, HEK-293T cells were transfected by calcium phosphate precipitation, in 15cm dishes, at 50% confluency, with 10 $\mu$ g shuttle plasmid, 10 $\mu$ g pMDLg-pRRE, 3.4 $\mu$ g pMD2.G and 2 $\mu$ g pRSV-Rev per dish. Cell medium was collected over two days and centrifuged at 6,000g overnight, the pellet resuspended in PBS and the new suspension centrifuged in a SW40-Ti rotor (Beckman Coulter Ltd, High Wycombe, UK) at 50,000g for 90min. Finally, the resulting pellet was resuspended in PBS, at 1:2,000 of the original medium volume. The viral titre was calculated by FACS (detecting EGFP fluorescence) on HEK-293T cells transduced with serial dilutions of the viral preparations.

#### *Combined KEGG pathway / miRNA-target prediction analysis*

Version 2 of the DIANA miRPath software was used (Vlachos et al., 2012). The four mature species of the human *miR-199a/214* cluster (*hsa-miR-199a-5p*, *hsa-miR-199a-3p*, *hsa-miR-214-5p*, *hsa-miR-214-3p*) were used as input.
